# Supplementary material for: Water Treatment Effect, Microbial Community Structure, and Metabolic Characteristics in a Field-Scale Aquaculture Wastewater Treatment System
Source: Front Microbiol. 2020 Jun 5;11:930. doi: 10.3389/fmicb.2020.00930 (PMC7325950; doi:10.3389/fmicb.2020.00930)
Supplement: Supplementary file 2 [file Table_2.xlsx]

## Sheet: Sheet1
Table S2. Dominant OTUs detected in the present study.
#OTU_num	p-values	Effect size	WCP1	WCP2	WCP3	BAS1	BAS2	BAS3	WASFP1	WASFP2	WASFP3	BAFB1	BAFB2	BAFB3	WAFBFP1	WAFBFP2	WAFBFP3	BBr1	BBr2	BBr3	WBrFP1	WBrFP2	WBrFP3	WWSP1	WWSP2	WWSP3	Taxonomy
OTU_13	0.0496073	0.538156	0.00502188	0.00442522	0.00278441	0.0124304	0.00770684	0.00497216	0.00820406	0.00472355	0.00671241	0.0132259	0.0140215	0.059815	0.00228719	0.00313246	0.00293357	0.00198886	0.00223747	0.00303302	0.00313246	0.00213803	0.00243636	0.000745823	0.00104415	0.00094471	k__Bacteria;p__Proteobacteria;c__Betaproteobacteria;o__Rhodocyclales;f__Rhodocyclaceae;g__Dechloromonas;s__
OTU_248	0.0487281	0.539465	0.000198886	0.000198886	0.000149165	0.000198886	0.000248608	0.000198886	0.00119332	0.000248608	0.000795545	0.000348051	0.000198886	0.000198886	0.000298329	0.000894988	0.00104415	0.000795545	0.000497216	0.000149165	9.94431e-05	9.94431e-05	0.000298329	0.000198886	0.000149165	9.94431e-05	k__Bacteria;p__Verrucomicrobia;c__Verrucomicrobiae;o__Verrucomicrobiales;f__Verrucomicrobiaceae;g__;s__
OTU_724	0.0440804	0.546703	0.000149165	4.97216e-05	4.97216e-05	0.000198886	0.000149165	0.000298329	9.94431e-05	0	4.97216e-05	0.000248608	4.97216e-05	0.000198886	4.97216e-05	0.000149165	4.97216e-05	0.00109387	0.000348051	0.000248608	4.97216e-05	0	4.97216e-05	0	0.000149165	4.97216e-05	k__Bacteria;p__Planctomycetes;c__Planctomycetia;o__Gemmatales;f__Gemmataceae;g__Gemmata;s__
OTU_514	0.0433334	0.547921	0	4.97216e-05	0	4.97216e-05	9.94431e-05	9.94431e-05	9.94431e-05	0	4.97216e-05	0	4.97216e-05	4.97216e-05	4.97216e-05	4.97216e-05	9.94431e-05	0.00149165	0.000298329	0.000298329	0	4.97216e-05	4.97216e-05	0	0	9.94431e-05	k__Bacteria;p__Planctomycetes;c__Planctomycetia;o__Pirellulales;f__Pirellulaceae;g__Pirellula;s__
OTU_436	0.0425428	0.549228	4.97216e-05	0.000149165	4.97216e-05	0.000696102	0.000248608	0.000248608	0.000149165	0.000149165	4.97216e-05	0.000397772	0.000149165	0.000745823	0	0	9.94431e-05	0.000745823	0.000198886	0.00174025	4.97216e-05	0	4.97216e-05	0	0.000149165	9.94431e-05	k__Bacteria;p__Proteobacteria;c__Gammaproteobacteria
OTU_5271	0.036463	0.559967	0.00387828	0.0118835	0.0346062	0.00208831	0.00149165	0.00159109	0.00188942	0.00164081	0.00243636	0.00283413	0.00338107	0.00278441	0.00159109	0.00134248	0.00193914	0.000894988	0.0013922	0.00154137	0.00357995	0.00223747	0.00318218	0.000795545	0.000994431	0.000497216	k__Bacteria;p__Proteobacteria;c__Betaproteobacteria;o__Burkholderiales;f__Comamonadaceae
OTU_399	0.0342971	0.564133	0.00129276	0.000696102	0.000248608	0.000397772	9.94431e-05	0.000198886	0.000149165	0.000248608	0.000198886	9.94431e-05	4.97216e-05	0.000198886	9.94431e-05	4.97216e-05	4.97216e-05	0.000298329	0.000298329	0.000248608	4.97216e-05	0.000397772	0.000298329	9.94431e-05	9.94431e-05	0	k__Bacteria;p__Proteobacteria;c__TA18;o__PHOS-HD29;f__;g__;s__
OTU_361	0.0326487	0.567444	0	4.97216e-05	0	0	4.97216e-05	0.000149165	0	0.000149165	9.94431e-05	0.000248608	4.97216e-05	9.94431e-05	0	0	9.94431e-05	0.000596659	0.000298329	0.00203858	0	0	9.94431e-05	0.000149165	0	0	k__Bacteria;p__Proteobacteria;c__Deltaproteobacteria
OTU_279	0.0311002	0.570677	0.00238663	0.00144193	0	0.000198886	0.000149165	0	4.97216e-05	0.000198886	0.000248608	9.94431e-05	4.97216e-05	4.97216e-05	0.000149165	4.97216e-05	9.94431e-05	9.94431e-05	4.97216e-05	4.97216e-05	4.97216e-05	4.97216e-05	0.000149165	4.97216e-05	0	4.97216e-05	k__Bacteria;p__Bacteroidetes;c__[Saprospirae];o__[Saprospirales];f__Chitinophagaceae;g__Segetibacter;s__
OTU_2111	0.0301074	0.572817	0.000348051	0.000397772	0.000348051	0.00258552	0.00223747	0.00104415	0.000248608	0.000397772	0.000248608	0.000795545	0.000845267	0.00472355	0.000198886	4.97216e-05	0.000298329	0.000596659	0.000198886	0.000298329	0.000248608	0.000149165	9.94431e-05	0.000198886	0.000397772	0.000149165	k__Bacteria;p__Acidobacteria;c__Acidobacteria-6;o__iii1-15;f__;g__;s__
OTU_113	0.0294351	0.574298	0.000696102	0.00233691	0.000546937	0.00064638	0.00169053	0.00178998	0.000497216	0.000447494	0.000447494	0.000149165	0.000447494	0.000298329	0.000447494	0.000447494	0.000497216	0.000397772	0.000596659	0.000397772	0.000497216	0.000795545	0.00064638	0.000546937	0.00064638	0.000348051	k__Bacteria;p__Actinobacteria;c__Actinobacteria;o__Actinomycetales;f__Nocardiaceae;g__Rhodococcus;s__
OTU_357	0.0293937	0.57439	9.94431e-05	0.000248608	9.94431e-05	0.000397772	0.000248608	0.000149165	0	0.000198886	0.000149165	0.000298329	0.000795545	0.000198886	4.97216e-05	0	9.94431e-05	0.000298329	0.000845267	0.00178998	0.000198886	0.000198886	0.000248608	0	9.94431e-05	9.94431e-05	k__Bacteria;p__Proteobacteria;c__Alphaproteobacteria;o__Sphingomonadales;f__Sphingomonadaceae;g__;s__
OTU_351	0.0292611	0.574685	0.000298329	9.94431e-05	0.000248608	0.000447494	4.97216e-05	0.000298329	9.94431e-05	0	0	4.97216e-05	0	0	9.94431e-05	0.000149165	0	0.00149165	0.000546937	0.000348051	4.97216e-05	0.000198886	4.97216e-05	0	0.000149165	0	k__Bacteria;p__Cyanobacteria;c__Synechococcophycideae
OTU_390	0.0280426	0.577452	0.000894988	4.97216e-05	4.97216e-05	0.000447494	0.000447494	0.000198886	9.94431e-05	0.000248608	4.97216e-05	0	0.000298329	9.94431e-05	0.000149165	4.97216e-05	9.94431e-05	0.000546937	0.000497216	0.00119332	9.94431e-05	4.97216e-05	4.97216e-05	9.94431e-05	4.97216e-05	4.97216e-05	k__Bacteria;p__Proteobacteria;c__Alphaproteobacteria;o__Rhodobacterales;f__Hyphomonadaceae;g__;s__
OTU_364	0.0279156	0.577746	9.94431e-05	4.97216e-05	0	0.000198886	0	0.000149165	9.94431e-05	0.000149165	9.94431e-05	0.000596659	0.00238663	0.000546937	9.94431e-05	4.97216e-05	9.94431e-05	0.000298329	9.94431e-05	4.97216e-05	4.97216e-05	0.000149165	0	0	9.94431e-05	4.97216e-05	k__Bacteria;p__Proteobacteria;c__Gammaproteobacteria;o__Alteromonadales;f__Alteromonadaceae;g__Cellvibrio;s__
OTU_674	0.025659	0.583154	0.000795545	0.00104415	0.000149165	0.000497216	0.000348051	0.000248608	0.000696102	0.000198886	0.000546937	9.94431e-05	9.94431e-05	0.000298329	0.000149165	0.000248608	9.94431e-05	0.000596659	0.000149165	9.94431e-05	0.000497216	0.000994431	0.000994431	0	4.97216e-05	4.97216e-05	k__Bacteria;p__Cyanobacteria;c__Synechococcophycideae;o__Synechococcales;f__Synechococcaceae;g__Synechococcus;s__
OTU_199	0.0255977	0.583306	0.0011436	0.000596659	0.000248608	0.000696102	0.000994431	0.000745823	0.000298329	0.000298329	0.000348051	0.0057677	0.00223747	0.000894988	9.94431e-05	0.000298329	0.000248608	0.000447494	0.000596659	0.000497216	0.000149165	0.000149165	0.000298329	0.000348051	0.000298329	0.000397772	k__Bacteria;p__Proteobacteria;c__Alphaproteobacteria;o__Rhizobiales;f__Rhizobiaceae
OTU_271	0.0254799	0.583599	0.000149165	0.000198886	0	0.00174025	0.000447494	0.000497216	0.000397772	0.000397772	0.000596659	0.000149165	0.000298329	0.000149165	9.94431e-05	0.000149165	0.000198886	0.000298329	0.000397772	0.000497216	0.000149165	0	0.000149165	9.94431e-05	0.000149165	4.97216e-05	k__Bacteria;p__Proteobacteria;c__Deltaproteobacteria;o__Syntrophobacterales;f__Syntrophaceae;g__;s__
OTU_1378	0.0253533	0.583915	0.000348051	0.00104415	0.000198886	0	9.94431e-05	9.94431e-05	4.97216e-05	9.94431e-05	0	0	4.97216e-05	4.97216e-05	4.97216e-05	0.000149165	0.000149165	0	0	0	4.97216e-05	4.97216e-05	0	0	0	4.97216e-05	k__Bacteria;p__Proteobacteria;c__Deltaproteobacteria;o__FAC87;f__;g__;s__
OTU_201	0.0247764	0.585372	9.94431e-05	0.000149165	0.000298329	0.000298329	0.000248608	0.000447494	4.97216e-05	4.97216e-05	4.97216e-05	0.00611575	0.00149165	0.00119332	4.97216e-05	4.97216e-05	4.97216e-05	0.000298329	0.000348051	0.000397772	9.94431e-05	4.97216e-05	9.94431e-05	9.94431e-05	0.000149165	9.94431e-05	k__Bacteria;p__Proteobacteria;c__Alphaproteobacteria;o__Rhizobiales;f__;g__;s__
OTU_700	0.023694	0.58818	0.000198886	0.000149165	0	9.94431e-05	9.94431e-05	0	4.97216e-05	9.94431e-05	9.94431e-05	0.000298329	0.000795545	0.00213803	0	4.97216e-05	9.94431e-05	9.94431e-05	0	0.000149165	0	4.97216e-05	9.94431e-05	9.94431e-05	4.97216e-05	0	k__Bacteria;p__Bacteroidetes;c__[Saprospirae];o__[Saprospirales];f__Chitinophagaceae
OTU_617	0.022083	0.592555	0	9.94431e-05	0	4.97216e-05	9.94431e-05	4.97216e-05	0	0	0.000149165	0.00313246	0.000845267	0.000596659	4.97216e-05	4.97216e-05	4.97216e-05	9.94431e-05	0.000149165	0.000149165	0.000149165	0	0.000198886	0.000149165	0.000149165	0	k__Bacteria;p__Proteobacteria;c__Alphaproteobacteria;o__Rhizobiales
OTU_5464	0.0213635	0.594591	0.00109387	0.000248608	0.000497216	0.000596659	0.000149165	0.000149165	0.00109387	9.94431e-05	0.000447494	0	9.94431e-05	0.000248608	0.000198886	0.000348051	0.000248608	0.000397772	9.94431e-05	4.97216e-05	0.000696102	0.00203858	0.00124304	9.94431e-05	0.000149165	0	k__Bacteria;p__Cyanobacteria;c__Synechococcophycideae;o__Synechococcales;f__Synechococcaceae;g__Synechococcus;s__
OTU_389	0.0212689	0.594863	9.94431e-05	9.94431e-05	9.94431e-05	9.94431e-05	9.94431e-05	0.000248608	9.94431e-05	4.97216e-05	9.94431e-05	0.000397772	0.000497216	0.00169053	9.94431e-05	9.94431e-05	4.97216e-05	0	0.000149165	9.94431e-05	9.94431e-05	0	4.97216e-05	9.94431e-05	4.97216e-05	0	k__Bacteria;p__Proteobacteria;c__Gammaproteobacteria
OTU_298	0.0205721	0.596896	0.000348051	0.000745823	0.00178998	0.000298329	0.000397772	0.000447494	0.000248608	0.000248608	0.000348051	0.000149165	0.000348051	0.000149165	0.000198886	0.000248608	0.000298329	0.000497216	0.000696102	0.000447494	9.94431e-05	9.94431e-05	0.000198886	9.94431e-05	9.94431e-05	9.94431e-05	k__Bacteria;p__Gemmatimonadetes;c__Gemmatimonadetes;o__Gemmatimonadales
OTU_237	0.0202925	0.597727	0.000149165	0.000198886	9.94431e-05	0.00208831	0.00109387	0.000497216	0.000198886	0.000298329	0.000348051	0.000546937	0.00213803	0.000348051	9.94431e-05	4.97216e-05	0.000149165	0.000696102	0.000497216	0.000894988	0.000149165	0.000149165	0.000198886	9.94431e-05	0	0	k__Bacteria;p__Proteobacteria;c__Betaproteobacteria;o__Burkholderiales;f__Oxalobacteraceae;g__;s__
OTU_541	0.0201509	0.598152	0.00144193	0.000894988	0.000149165	0.000248608	0.000248608	0.000248608	0.000198886	0.000348051	0.000248608	4.97216e-05	0.000149165	0.000149165	4.97216e-05	4.97216e-05	0.000348051	0.000149165	0	4.97216e-05	0.000149165	4.97216e-05	4.97216e-05	0	9.94431e-05	9.94431e-05	k__Bacteria;p__Proteobacteria;c__Gammaproteobacteria;o__Legionellales;f__Legionellaceae;g__;s__
OTU_407	0.0198038	0.599202	0.000546937	0.00164081	0.000546937	0	9.94431e-05	0.000149165	0.000397772	0.000447494	0.000447494	9.94431e-05	4.97216e-05	9.94431e-05	4.97216e-05	0.000596659	0.000447494	0.000198886	0.000198886	0.000149165	0.000149165	0	4.97216e-05	0.000149165	0.000149165	4.97216e-05	k__Bacteria;p__Bacteroidetes;c__[Saprospirae];o__[Saprospirales];f__Chitinophagaceae;g__;s__
OTU_547	0.019663	0.599633	4.97216e-05	0	4.97216e-05	4.97216e-05	0.000149165	0.000149165	0.000149165	4.97216e-05	4.97216e-05	0.000298329	0	4.97216e-05	0	4.97216e-05	0	0.000447494	0.00169053	0.000397772	0	0	0	0	4.97216e-05	9.94431e-05	k__Bacteria;p__Proteobacteria;c__Alphaproteobacteria;o__Rhizobiales
OTU_324	0.0195542	0.599967	4.97216e-05	0.000149165	0	9.94431e-05	4.97216e-05	9.94431e-05	0	0	0.000149165	4.97216e-05	9.94431e-05	0.000149165	9.94431e-05	9.94431e-05	0	0.000994431	0.000248608	0.00218775	0	0	0	4.97216e-05	4.97216e-05	9.94431e-05	k__Bacteria;p__Bacteroidetes;c__[Saprospirae];o__[Saprospirales];f__Chitinophagaceae
OTU_629	0.0192051	0.60105	4.97216e-05	9.94431e-05	0	0.000298329	0.000149165	0.000149165	0	0	0	0.000248608	9.94431e-05	0	4.97216e-05	4.97216e-05	0	0.000596659	0.00258552	0.00064638	4.97216e-05	4.97216e-05	4.97216e-05	0.000149165	9.94431e-05	0.000198886	k__Bacteria;p__Proteobacteria;c__Alphaproteobacteria;o__Rhodobacterales;f__Hyphomonadaceae;g__;s__
OTU_863	0.0190663	0.601485	0	0.000198886	4.97216e-05	0.00124304	0.000447494	0.000348051	0.000248608	0.000298329	0.000149165	0.000845267	0.00174025	0.000298329	0.000149165	0.000149165	0	9.94431e-05	0.000149165	9.94431e-05	9.94431e-05	4.97216e-05	0	4.97216e-05	0.000198886	0	k__Bacteria;p__Proteobacteria;c__Betaproteobacteria;o__Burkholderiales;f__Oxalobacteraceae
OTU_365	0.0189497	0.601852	0.000447494	0.0011436	0.000149165	0.000198886	0.000149165	9.94431e-05	0.000497216	0.00064638	0.00124304	4.97216e-05	9.94431e-05	0.000149165	0.000546937	0.000894988	0.000596659	9.94431e-05	9.94431e-05	9.94431e-05	0.000248608	0.000298329	0.000596659	4.97216e-05	9.94431e-05	0.000149165	k__Bacteria;p__Spirochaetes;c__[Leptospirae];o__[Leptospirales];f__Leptospiraceae;g__Leptospira;s__
OTU_302	0.0188808	0.60207	4.97216e-05	0.000198886	0.000248608	0.000596659	0.000248608	0.000497216	9.94431e-05	0.000248608	0.000149165	0.000348051	0.00193914	0.000795545	0.000198886	4.97216e-05	4.97216e-05	0.000248608	0.000198886	0.000298329	0.000198886	4.97216e-05	9.94431e-05	4.97216e-05	9.94431e-05	9.94431e-05	k__Bacteria;p__Chlorobi;c__OPB56;o__;f__;g__;s__
OTU_4410	0.0187293	0.602552	0.000198886	0.000298329	0.000248608	0.0011436	0.000795545	0.00064638	0.000397772	0.000298329	0.000298329	0.00134248	0.00397772	0.000845267	0.000149165	0.000198886	0.000149165	0.000248608	0.000596659	0.000298329	0.000298329	0.000248608	0.000248608	4.97216e-05	0.000198886	0.000198886	k__Bacteria;p__Proteobacteria;c__Betaproteobacteria;o__Burkholderiales
OTU_36	0.0184728	0.603374	0.00447494	0.00258552	0.000845267	0.00144193	0.00119332	0.0011436	0.00890016	0.00193914	0.00432578	0.000795545	0.000745823	0.00203858	0.000447494	0.00094471	0.000696102	0.0013922	0.00109387	0.00109387	0.00248608	0.00566826	0.00666269	0.000845267	0.000497216	0.000994431	k__Bacteria;p__Verrucomicrobia;c__[Pedosphaerae];o__[Pedosphaerales]
OTU_308	0.0181828	0.604315	0.000298329	4.97216e-05	0.000298329	0.00308274	0.000397772	0.00154137	0.000149165	4.97216e-05	0.000149165	9.94431e-05	0.000198886	0.000198886	0.000348051	0.000149165	0.000198886	0.00104415	0.000447494	0.000198886	0.000198886	0.000248608	4.97216e-05	4.97216e-05	9.94431e-05	0	k__Bacteria;p__Cyanobacteria;c__Synechococcophycideae;o__Pseudanabaenales;f__Pseudanabaenaceae
OTU_780	0.0178527	0.6054	0.000696102	0.00119332	0.000298329	0.00109387	0.000248608	0.000745823	0.000696102	0.000248608	0.000546937	4.97216e-05	9.94431e-05	9.94431e-05	0.000447494	0.000397772	0.000397772	0.000447494	0.000198886	0.000198886	0.000845267	0.000994431	0.000845267	9.94431e-05	9.94431e-05	0.000149165	k__Bacteria;p__Cyanobacteria;c__Synechococcophycideae;o__Synechococcales;f__Synechococcaceae;g__Synechococcus;s__
OTU_196	0.0171237	0.607857	0.000348051	0.000248608	0.000497216	4.97216e-05	0.000149165	0.000198886	9.94431e-05	0.000149165	0.000198886	4.97216e-05	4.97216e-05	0.000149165	0.000149165	0.000149165	0.000149165	0.0050716	0.00223747	0.000596659	9.94431e-05	0.000198886	0.000149165	9.94431e-05	0.000149165	0	k__Bacteria;p__Cyanobacteria
OTU_41	0.0164317	0.610268	0.00357995	0.0011436	0.00313246	0.00258552	0.00208831	0.0025358	0.00094471	0.00129276	0.000795545	0.00174025	0.00159109	0.00109387	0.000546937	0.00064638	0.000546937	0.00357995	0.0148667	0.00467383	0.00104415	0.00169053	0.00154137	0.000745823	0.000845267	0.000397772	k__Bacteria;p__Proteobacteria;c__Alphaproteobacteria;o__Sphingomonadales;f__Erythrobacteraceae
OTU_809	0.0157846	0.612597	0.00124304	0.00193914	0.000596659	0.000745823	0.000696102	0.000596659	0.00104415	0.0011436	0.00223747	0.000397772	0.000298329	0.000596659	0.000348051	0.000845267	0.000546937	0.00218775	0.000546937	0.000795545	0.00159109	0.0018397	0.00238663	9.94431e-05	0.000248608	9.94431e-05	k__Bacteria;p__Planctomycetes;c__Planctomycetia;o__Pirellulales;f__Pirellulaceae;g__;s__
OTU_22	0.0155968	0.613288	0.0025358	0.00328162	0.00223747	0.0043755	0.00432578	0.0036794	0.00208831	0.00213803	0.00228719	0.0249602	0.050716	0.00621519	0.00164081	0.00198886	0.00174025	0.00372912	0.00551909	0.00517104	0.00159109	0.00134248	0.00129276	0.00606603	0.0109387	0.00701074	k__Bacteria;p__Proteobacteria;c__Alphaproteobacteria;o__Sphingomonadales;f__Sphingomonadaceae;g__Novosphingobium;s__
OTU_509	0.0155161	0.613587	0	4.97216e-05	4.97216e-05	9.94431e-05	4.97216e-05	9.94431e-05	4.97216e-05	4.97216e-05	0	0.000447494	0.00119332	0.000198886	4.97216e-05	9.94431e-05	0	4.97216e-05	4.97216e-05	0	0	0	4.97216e-05	4.97216e-05	0.000149165	4.97216e-05	k__Bacteria;p__Proteobacteria;c__Betaproteobacteria;o__Methylophilales;f__Methylophilaceae
OTU_440	0.0154319	0.6139	0	4.97216e-05	0.000149165	0	0.000198886	4.97216e-05	4.97216e-05	9.94431e-05	0	0.00228719	0.00094471	0.000298329	0	0	0	9.94431e-05	9.94431e-05	4.97216e-05	0	0	0	9.94431e-05	4.97216e-05	0	k__Bacteria;p__Proteobacteria;c__Alphaproteobacteria;o__Caulobacterales;f__Caulobacteraceae;g__Asticcacaulis;s__
OTU_154	0.0152497	0.614582	0.000298329	0.000745823	0.000497216	0.000546937	0.000745823	0.000696102	0.000198886	0.000397772	0.000149165	0.00154137	0.00174025	0.00551909	0.000298329	0.000149165	0.000298329	0.000397772	0.000596659	0.000447494	0.000198886	9.94431e-05	0.000248608	0.000397772	0.000248608	0.000248608	k__Bacteria;p__Proteobacteria;c__Alphaproteobacteria;o__Rhizobiales;f__Bradyrhizobiaceae;g__Bradyrhizobium;s__
OTU_1432	0.0151109	0.615106	0.00159109	0.00258552	0.000596659	0.000397772	0.000397772	0.000696102	0.00154137	0.000795545	0.00178998	0.000397772	0.000497216	0.000497216	0.000348051	0.000696102	0.000497216	0.000696102	0.000348051	0.000447494	0.000894988	0.000795545	0.00094471	0.000348051	0.000149165	0.000198886	k__Bacteria;p__Planctomycetes;c__Planctomycetia;o__Pirellulales;f__Pirellulaceae;g__;s__
OTU_220	0.0141931	0.618674	9.94431e-05	0.000198886	9.94431e-05	9.94431e-05	9.94431e-05	0.000149165	0.000546937	0.00119332	0.000696102	9.94431e-05	0.000248608	0.000248608	0.00064638	0.000397772	0.000298329	0.000198886	0.000149165	0.000298329	0.000348051	0.00134248	0.000397772	9.94431e-05	9.94431e-05	4.97216e-05	k__Bacteria;p__Proteobacteria;c__Gammaproteobacteria
OTU_260	0.0138561	0.620031	0.000198886	9.94431e-05	9.94431e-05	0.00104415	0.000497216	0.00094471	0.000497216	0.000248608	0.000348051	0.000397772	0.00104415	0.00243636	0.000198886	0.000149165	9.94431e-05	0.000397772	0.000149165	9.94431e-05	0.000149165	0.000198886	0.000149165	0.000149165	0.000149165	0.000198886	k__Bacteria;p__Verrucomicrobia;c__[Pedosphaerae];o__[Pedosphaerales];f__auto67_4W;g__;s__
OTU_413	0.0138384	0.620103	4.97216e-05	4.97216e-05	4.97216e-05	9.94431e-05	4.97216e-05	4.97216e-05	4.97216e-05	0	9.94431e-05	9.94431e-05	0.000348051	4.97216e-05	0	9.94431e-05	0	0.000397772	0.00178998	0.000546937	4.97216e-05	0.000149165	4.97216e-05	4.97216e-05	4.97216e-05	0	k__Bacteria;p__Proteobacteria;c__Alphaproteobacteria;o__Rhizobiales;f__Hyphomicrobiaceae
OTU_163	0.0135746	0.621186	0.000497216	0.000348051	0.000696102	0.00064638	0.000298329	0.000894988	0.000198886	9.94431e-05	0.000348051	9.94431e-05	0.000248608	0.000348051	0.000248608	0.000447494	0.000497216	0.00656325	0.000745823	0.00348051	0.000248608	0.000149165	0.000149165	9.94431e-05	0.000198886	9.94431e-05	k__Bacteria;p__Cyanobacteria
OTU_517	0.0135562	0.621262	0.000198886	4.97216e-05	4.97216e-05	0.00144193	0.000745823	0.000248608	0.000248608	9.94431e-05	0.000149165	0.000497216	0.00134248	0.000447494	9.94431e-05	9.94431e-05	0.000149165	9.94431e-05	4.97216e-05	9.94431e-05	0.000149165	9.94431e-05	0	4.97216e-05	9.94431e-05	4.97216e-05	k__Bacteria;p__Proteobacteria;c__Gammaproteobacteria;o__Pseudomonadales;f__Moraxellaceae
OTU_550	0.0134427	0.621733	0	4.97216e-05	0	4.97216e-05	4.97216e-05	0.000198886	0	9.94431e-05	9.94431e-05	0	4.97216e-05	0	0	9.94431e-05	0	0.00109387	0.000348051	0.000348051	0	4.97216e-05	4.97216e-05	0	4.97216e-05	0	k__Bacteria;p__Acidobacteria;c__[Chloracidobacteria];o__PK29;f__;g__;s__
OTU_360	0.0128413	0.624286	0.00174025	0.00213803	0.000198886	9.94431e-05	0.000348051	0.000198886	0.000298329	0.000497216	0.000497216	0.000198886	0.000149165	9.94431e-05	0.000198886	0.000348051	0.000348051	0.000198886	0.000198886	4.97216e-05	9.94431e-05	9.94431e-05	9.94431e-05	0.000149165	9.94431e-05	9.94431e-05	k__Bacteria;p__Actinobacteria;c__Acidimicrobiia;o__Acidimicrobiales
OTU_640	0.0123576	0.626411	4.97216e-05	4.97216e-05	0.000149165	4.97216e-05	0.000149165	0	0	0	4.97216e-05	0.00164081	0.00104415	9.94431e-05	0	4.97216e-05	0	0.000198886	0.000149165	4.97216e-05	4.97216e-05	0	0.000149165	4.97216e-05	9.94431e-05	9.94431e-05	k__Bacteria;p__Proteobacteria;c__Alphaproteobacteria;o__Caulobacterales;f__Caulobacteraceae;g__Caulobacter;s__
OTU_335	0.0122857	0.626733	0.000596659	0.000397772	0.00164081	0.000447494	0.000397772	0.000348051	0.000248608	0.000149165	9.94431e-05	0.000198886	0.000198886	0.000198886	0	0.000149165	0.000149165	0.000397772	0.000149165	0.000497216	0.000497216	0.000298329	0.000497216	9.94431e-05	9.94431e-05	9.94431e-05	k__Bacteria;p__Proteobacteria;c__Gammaproteobacteria;o__Xanthomonadales;f__Xanthomonadaceae
OTU_283	0.0122408	0.626934	0.00213803	0.00144193	0.000348051	0.000348051	0.000298329	0.000497216	0.000397772	0.000745823	0.000745823	0.000546937	0.000497216	0.00064638	0.000248608	0.000298329	0.000198886	0.00109387	0.000894988	0.00193914	0.000546937	0.000298329	0.000546937	0.000198886	0.000397772	9.94431e-05	k__Bacteria;p__Proteobacteria;c__Alphaproteobacteria;o__Rhodospirillales;f__Rhodospirillaceae;g__;s__
OTU_4356	0.0116829	0.629491	0.000795545	0.00134248	0.000149165	0	4.97216e-05	4.97216e-05	0.000497216	0.000298329	0.000397772	9.94431e-05	4.97216e-05	4.97216e-05	4.97216e-05	9.94431e-05	9.94431e-05	4.97216e-05	0	4.97216e-05	0.000497216	0.000149165	0.000298329	4.97216e-05	0	0	k__Bacteria;p__Actinobacteria;c__Actinobacteria;o__Actinomycetales;f__;g__;s__
OTU_598	0.011371	0.630964	0	4.97216e-05	0	0	4.97216e-05	9.94431e-05	4.97216e-05	0	4.97216e-05	0.000198886	0.000149165	0	0	9.94431e-05	0	0.000198886	0.0011436	0.000397772	4.97216e-05	0	4.97216e-05	4.97216e-05	9.94431e-05	4.97216e-05	k__Bacteria;p__Proteobacteria;c__Alphaproteobacteria;o__Caulobacterales;f__Caulobacteraceae;g__Mycoplana;s__
OTU_174	0.0105642	0.634933	0.000497216	0.000546937	0.00452466	0.000497216	0.000248608	0.000546937	0.000298329	0.000298329	0.000298329	0.000298329	0.000497216	0.000497216	0.000348051	0.000198886	0.000198886	0.00218775	0.00203858	0.00422633	4.97216e-05	4.97216e-05	0.000298329	0	0.000248608	0.000248608	k__Bacteria;p__Bacteroidetes;c__[Saprospirae];o__[Saprospirales];f__Chitinophagaceae
OTU_623	0.0105054	0.635232	0	9.94431e-05	9.94431e-05	0.000348051	0.000348051	0.000348051	9.94431e-05	0.000149165	0.000198886	0.000298329	0.00104415	0.000248608	0	9.94431e-05	0.000149165	9.94431e-05	0	0	4.97216e-05	4.97216e-05	4.97216e-05	4.97216e-05	9.94431e-05	0	k__Bacteria;p__Proteobacteria;c__Betaproteobacteria;o__Procabacteriales;f__Procabacteriaceae;g__Leeia;s__oryzae
OTU_345	0.0104868	0.635327	0.000298329	0.000447494	0.000348051	0.000397772	4.97216e-05	0.000149165	0.000248608	0.000198886	0.000447494	4.97216e-05	9.94431e-05	0	0.000149165	0.000298329	0.000248608	0.000298329	4.97216e-05	9.94431e-05	0.000845267	0.00178998	0.000546937	9.94431e-05	4.97216e-05	4.97216e-05	k__Bacteria;p__Cyanobacteria;c__Oscillatoriophycideae;o__Chroococcales
OTU_46	0.0102232	0.636685	0.0122315	0.00149165	0.00134248	0.00994431	0.00502188	0.00671241	0.00536993	0.00134248	0.00238663	0.000298329	0.0011436	0.000795545	0.000546937	0.0011436	0.000994431	0.00104415	0.000298329	0.000397772	0.00134248	0.00104415	0.000745823	0.000745823	0.000696102	0.000497216	k__Bacteria;p__Cyanobacteria;c__Synechococcophycideae;o__Synechococcales;f__Synechococcaceae;g__Synechococcus;s__
OTU_375	0.00983271	0.638752	9.94431e-05	0.000149165	4.97216e-05	0.000397772	0.000447494	0.00064638	0.000198886	4.97216e-05	4.97216e-05	0.000845267	0.000696102	0.00248608	0	9.94431e-05	9.94431e-05	0.000248608	0.000348051	0.000745823	9.94431e-05	4.97216e-05	0.000149165	0.000149165	0	4.97216e-05	k__Bacteria;p__Proteobacteria;c__Betaproteobacteria
OTU_604	0.00945147	0.640835	9.94431e-05	9.94431e-05	9.94431e-05	0.0011436	0.00124304	0.00064638	4.97216e-05	9.94431e-05	0.000298329	0.000596659	0.000546937	0.00233691	0.000149165	4.97216e-05	0.000198886	0.000348051	0.000298329	0.000497216	0.000248608	4.97216e-05	0.000149165	9.94431e-05	0.000149165	9.94431e-05	k__Bacteria;p__Proteobacteria;c__Betaproteobacteria;o__Nitrosomonadales;f__Nitrosomonadaceae;g__;s__
OTU_97	0.00944642	0.640863	0.000596659	0.000397772	0.000894988	0.000198886	0.000248608	9.94431e-05	0.000348051	0.000596659	0.000497216	0.000596659	0.00775656	0.00551909	0.000497216	0.00104415	0.000497216	0.000497216	0.000298329	9.94431e-05	0.000298329	0.000497216	0.000248608	0.000348051	0.000298329	9.94431e-05	k__Bacteria;p__Cyanobacteria;c__Chloroplast;o__Streptophyta;f__;g__;s__
OTU_534	0.0093451	0.641428	9.94431e-05	0.000149165	0.000198886	0.000248608	9.94431e-05	0.000149165	4.97216e-05	0.000149165	0.000149165	0.000397772	0.000696102	0.00064638	9.94431e-05	4.97216e-05	0.000149165	0.000696102	0.000447494	0.00188942	9.94431e-05	4.97216e-05	9.94431e-05	9.94431e-05	9.94431e-05	0	k__Bacteria;p__Proteobacteria;c__Betaproteobacteria
OTU_96	0.00890735	0.64393	0.000845267	0.00094471	0.000546937	0.00313246	0.00318218	0.0032319	0.000994431	0.000696102	0.000696102	0.00208831	0.00238663	0.00885044	0.000397772	0.000298329	0.000497216	0.0011436	0.00124304	0.000894988	0.000497216	0.000298329	0.000397772	0.000447494	0.000248608	0.000348051	k__Bacteria;p__Acidobacteria;c__Acidobacteria-6;o__iii1-15;f__;g__;s__
OTU_263	0.00799484	0.649488	0.000198886	0.000149165	0.000149165	0	4.97216e-05	0.000149165	4.97216e-05	4.97216e-05	0.000149165	9.94431e-05	4.97216e-05	9.94431e-05	4.97216e-05	9.94431e-05	4.97216e-05	0.0032319	0.000894988	0.000894988	0.000248608	0.000149165	0.000149165	4.97216e-05	9.94431e-05	4.97216e-05	k__Bacteria;p__Cyanobacteria;c__Oscillatoriophycideae
OTU_427	0.00795648	0.649733	0	0.000149165	0	0	0	0	4.97216e-05	9.94431e-05	9.94431e-05	0	0.000149165	0	0.000149165	0.000298329	0.000149165	9.94431e-05	0	9.94431e-05	0	0	0	0.000348051	0.000497216	0.00129276	k__Bacteria;p__Cyanobacteria;c__Chloroplast;o__Stramenopiles;f__;g__;s__
OTU_218	0.00791875	0.649975	0.00164081	0.000149165	0.000248608	0.000149165	0.000149165	0.000149165	9.94431e-05	0.000248608	0.000248608	9.94431e-05	9.94431e-05	0.000149165	0.000149165	4.97216e-05	9.94431e-05	0.000248608	9.94431e-05	0.000149165	0.00109387	0.00134248	0.000994431	0.000198886	4.97216e-05	0	k__Bacteria;p__Bacteroidetes;c__[Saprospirae];o__[Saprospirales]
OTU_147	0.00788529	0.65019	0.000447494	0.00328162	0.00387828	0.000198886	0.000795545	0.000447494	0.000248608	0.000298329	0.000149165	0.000198886	0.000497216	0.000198886	0.000348051	0.000248608	9.94431e-05	0.000198886	0.000497216	0.000546937	0.000248608	9.94431e-05	0.000397772	0.000149165	0.000149165	0.000248608	k__Bacteria;p__Bacteroidetes;c__[Saprospirae];o__[Saprospirales];f__Chitinophagaceae;g__Sediminibacterium;s__
OTU_187	0.00779288	0.650788	0.000397772	0.000546937	0.000198886	0.000596659	0.000497216	0.000298329	0.000348051	0.000497216	0.000298329	0.00357995	0.00248608	0.0100438	9.94431e-05	0.000149165	0.000298329	0.000596659	0.000397772	0.000596659	0.000447494	0.000447494	0.000248608	0.000198886	0.000198886	0.000397772	k__Bacteria;p__Proteobacteria;c__Gammaproteobacteria
OTU_569	0.00769067	0.651457	9.94431e-05	9.94431e-05	0	0.000198886	0.000298329	0.000198886	0	0.000149165	9.94431e-05	0.000298329	0.00124304	0.000447494	0	9.94431e-05	0	9.94431e-05	0.000348051	0.000149165	0	0	0	4.97216e-05	0	4.97216e-05	k__Bacteria;p__Proteobacteria;c__Deltaproteobacteria;o__Myxococcales;f__;g__;s__
OTU_2294	0.00742151	0.653253	0.000198886	9.94431e-05	0.000248608	0.00104415	0.000397772	0.000546937	0.000447494	0.000546937	0.000149165	0.000348051	0.000298329	0.000497216	0.000298329	0.000447494	0.000546937	0.000248608	0.000298329	0.000149165	0.000198886	0.000248608	0.000298329	0.000198886	0	4.97216e-05	k__Bacteria;p__Verrucomicrobia;c__Opitutae;o__Opitutales;f__Opitutaceae;g__Opitutus;s__
OTU_702	0.00738978	0.653468	4.97216e-05	9.94431e-05	0	0.000447494	0.000298329	0.000198886	9.94431e-05	0	0.000149165	0.000149165	0.000248608	0.000149165	0	9.94431e-05	0	0.00104415	0.000198886	0.000397772	4.97216e-05	0	0	4.97216e-05	4.97216e-05	9.94431e-05	k__Bacteria;p__Verrucomicrobia;c__[Spartobacteria];o__[Chthoniobacterales];f__[Chthoniobacteraceae]
OTU_166	0.00734658	0.653762	0.00174025	0.00064638	0.00094471	0.000397772	0.000546937	0.000696102	0.000397772	0.000397772	0.000397772	0.000198886	0.000248608	0.000348051	4.97216e-05	0.000198886	0.000298329	0.000298329	0.000447494	0.000397772	0.000497216	0.00248608	0.00203858	0.000348051	0.000198886	0.000248608	k__Bacteria;p__Acidobacteria;c__[Chloracidobacteria];o__PK29;f__;g__;s__
OTU_830	0.00732272	0.653925	9.94431e-05	0	4.97216e-05	0	4.97216e-05	9.94431e-05	0	0	4.97216e-05	0	0	4.97216e-05	4.97216e-05	4.97216e-05	0	0.00144193	0.000298329	0.000546937	9.94431e-05	4.97216e-05	4.97216e-05	0	0	0	k__Bacteria;p__Acidobacteria;c__[Chloracidobacteria];o__RB41;f__Ellin6075;g__;s__
OTU_439	0.0073154	0.653976	0	9.94431e-05	0	0.000298329	0.000198886	0.000149165	9.94431e-05	0	0	0.00094471	0.00119332	9.94431e-05	0.000149165	0	0	0	9.94431e-05	4.97216e-05	4.97216e-05	0.000149165	4.97216e-05	0	4.97216e-05	0	k__Bacteria;p__Proteobacteria;c__Betaproteobacteria
OTU_564	0.00727815	0.654231	0.000248608	9.94431e-05	4.97216e-05	9.94431e-05	0	0	0.000149165	0.000198886	4.97216e-05	4.97216e-05	0	9.94431e-05	0.000298329	0.000397772	0.000497216	9.94431e-05	0	0	0	0	9.94431e-05	0.000348051	0.000845267	0.00169053	k__Bacteria;p__Cyanobacteria;c__Chloroplast;o__Stramenopiles;f__;g__;s__
OTU_648	0.00725887	0.654364	9.94431e-05	4.97216e-05	0	0.00109387	0.000248608	0.000497216	0	4.97216e-05	4.97216e-05	9.94431e-05	0.000149165	0.000198886	0	4.97216e-05	9.94431e-05	9.94431e-05	0.000298329	0.000248608	4.97216e-05	0	0	0	0	4.97216e-05	k__Bacteria;p__Proteobacteria;c__Betaproteobacteria
OTU_622	0.00719484	0.654807	4.97216e-05	9.94431e-05	0	0.000894988	0.00064638	0.000447494	9.94431e-05	4.97216e-05	0.000149165	0.000149165	0.000198886	0.0011436	4.97216e-05	0	0.000149165	4.97216e-05	0	4.97216e-05	9.94431e-05	0	0.000149165	0	4.97216e-05	0	k__Bacteria;p__Verrucomicrobia;c__[Pedosphaerae];o__[Pedosphaerales];f__;g__;s__
OTU_465	0.00662677	0.658888	0.00094471	0.000845267	0.000149165	9.94431e-05	4.97216e-05	0.000248608	0.000745823	0.000546937	0.00124304	0.000149165	4.97216e-05	0.000149165	0.000149165	0.000397772	0.000198886	0.000248608	0.000149165	0.000198886	0.000348051	0.000298329	0.000298329	0.000149165	9.94431e-05	9.94431e-05	k__Bacteria;p__Planctomycetes;c__Planctomycetia;o__Pirellulales;f__Pirellulaceae;g__;s__
OTU_156	0.00658099	0.65923	0.000745823	0.00263524	0.00124304	0.000994431	0.00104415	0.00094471	0.00174025	0.00198886	0.0025358	0.00178998	0.000795545	0.000546937	0.00243636	0.00422633	0.00427605	0.00124304	0.00208831	0.00149165	0.00104415	0.000845267	0.0013922	0.00154137	0.00243636	0.00188942	k__Bacteria;p__Proteobacteria;c__Alphaproteobacteria;o__Rhizobiales
OTU_367	0.00644453	0.660258	0.00228719	0.00243636	0.000696102	0.00094471	0.000447494	0.000795545	0.0025358	0.00064638	0.00144193	4.97216e-05	0.000447494	0.000149165	0.000447494	0.00064638	0.00064638	0.000596659	0.000198886	9.94431e-05	0.0011436	0.00124304	0.00129276	4.97216e-05	0.000198886	0.000198886	k__Bacteria;p__Cyanobacteria;c__Synechococcophycideae;o__Synechococcales;f__Synechococcaceae;g__Synechococcus;s__
OTU_765	0.00633197	0.661121	4.97216e-05	9.94431e-05	0	9.94431e-05	9.94431e-05	9.94431e-05	0	0	4.97216e-05	0.000696102	0.000248608	0.00104415	0	0	0	0.000397772	0	0	0	0	0.000198886	0	0	0	k__Bacteria;p__Planctomycetes;c__Planctomycetia;o__Pirellulales;f__Pirellulaceae;g__;s__
OTU_492	0.00617058	0.66238	4.97216e-05	0	0	0.000149165	4.97216e-05	4.97216e-05	0	0	9.94431e-05	0	9.94431e-05	0.000149165	4.97216e-05	0	0	0.000298329	0.00159109	0.00064638	0	4.97216e-05	0	0	0	0	k__Bacteria;p__Proteobacteria;c__Alphaproteobacteria;o__Rhodospirillales;f__Acetobacteraceae
OTU_548	0.00604264	0.663397	9.94431e-05	9.94431e-05	9.94431e-05	4.97216e-05	0.000248608	0.000149165	9.94431e-05	4.97216e-05	0	0	4.97216e-05	0.000447494	9.94431e-05	4.97216e-05	9.94431e-05	0.00178998	0.00064638	0.00064638	9.94431e-05	0	0	0	4.97216e-05	0.000198886	k__Bacteria;p__Chloroflexi;c__Anaerolineae;o__SBR1031;f__A4b;g__;s__
OTU_30	0.00602106	0.66357	0.00353023	0.0089996	0.00283413	0.000745823	0.0011436	0.00094471	0.00094471	0.00124304	0.00144193	0.00263524	0.00233691	0.00188942	0.000845267	0.00129276	0.00159109	0.00218775	0.00298329	0.0032319	0.00412689	0.00432578	0.00457438	0.000497216	0.000745823	0.000795545	k__Bacteria;p__Proteobacteria;c__Alphaproteobacteria;o__Sphingomonadales;f__Sphingomonadaceae;g__;s__
OTU_793	0.00585863	0.664892	4.97216e-05	9.94431e-05	0	0.000198886	4.97216e-05	9.94431e-05	0.000149165	4.97216e-05	0.000198886	0.00328162	0.00164081	0.000497216	4.97216e-05	0	0	0.000298329	0.000348051	0.000397772	0.000149165	0	4.97216e-05	4.97216e-05	0.000149165	0.000149165	k__Bacteria;p__Proteobacteria;c__Alphaproteobacteria;o__Rhizobiales
OTU_522	0.00569979	0.666214	0	9.94431e-05	4.97216e-05	0	4.97216e-05	4.97216e-05	0	4.97216e-05	4.97216e-05	0	9.94431e-05	4.97216e-05	0	4.97216e-05	4.97216e-05	0.000397772	0.000596659	0.00169053	0	0	4.97216e-05	0	4.97216e-05	9.94431e-05	k__Bacteria;p__Proteobacteria;c__Gammaproteobacteria
OTU_3765	0.00557724	0.667254	0.000198886	9.94431e-05	0.000198886	0	4.97216e-05	9.94431e-05	0.000397772	0.00193914	0.000845267	0.000198886	9.94431e-05	0.000198886	0.000596659	0.000845267	0.000447494	4.97216e-05	9.94431e-05	4.97216e-05	9.94431e-05	0	4.97216e-05	9.94431e-05	0	4.97216e-05	k__Bacteria;p__Bacteroidetes;c__Cytophagia;o__Cytophagales;f__Cytophagaceae
OTU_131	0.0050324	0.672124	0.00328162	0.00641408	0.00193914	0.00169053	0.00159109	0.00129276	0.00144193	0.00178998	0.00208831	0.00144193	0.00129276	0.00134248	0.00109387	0.0018397	0.00174025	0.000994431	0.000795545	0.00094471	0.00427605	0.00318218	0.00318218	0.000447494	0.00064638	0.000596659	k__Bacteria;p__Actinobacteria;c__Actinobacteria;o__Actinomycetales;f__;g__;s__
OTU_286	0.00498412	0.672576	9.94431e-05	0.000149165	9.94431e-05	0.000348051	0.000248608	0.000298329	0	9.94431e-05	0.000149165	0.00377884	0.00144193	0.00094471	0.000149165	9.94431e-05	0.000149165	0.000198886	0.000348051	0.000298329	4.97216e-05	9.94431e-05	4.97216e-05	0.000149165	9.94431e-05	0.000198886	k__Bacteria;p__Proteobacteria;c__Alphaproteobacteria;o__Rhizobiales
OTU_368	0.0049696	0.672713	0.000248608	0.000198886	0	0.0013922	0.000248608	0.00193914	0.000149165	0.000348051	0	9.94431e-05	0.000149165	0.000348051	4.97216e-05	9.94431e-05	0	4.97216e-05	9.94431e-05	4.97216e-05	0	4.97216e-05	4.97216e-05	9.94431e-05	0	0	k__Bacteria;p__Bacteroidetes;c__Sphingobacteriia;o__Sphingobacteriales;f__;g__;s__
OTU_37	0.00489753	0.673397	0.00243636	0.00671241	0.0159109	0.00164081	0.0013922	0.00144193	0.00477327	0.00517104	0.00641408	0.00134248	0.00124304	0.00134248	0.00556881	0.00860183	0.00845267	0.0011436	0.00124304	0.0013922	0.00169053	0.00159109	0.00218775	0.000894988	0.000894988	0.00094471	k__Bacteria;p__Actinobacteria;c__Actinobacteria;o__Actinomycetales
OTU_581	0.0048845	0.673521	4.97216e-05	4.97216e-05	0.000149165	0	0	9.94431e-05	4.97216e-05	9.94431e-05	4.97216e-05	0.000198886	9.94431e-05	0	0	0	9.94431e-05	0.000596659	0.00228719	0.000696102	0	0	4.97216e-05	4.97216e-05	0	0	k__Bacteria;p__Proteobacteria;c__Alphaproteobacteria
OTU_3985	0.00424677	0.679979	0.000348051	0.000149165	0	0.000596659	0.000696102	0.00064638	0.000198886	0.000248608	0.000149165	0.000795545	0.000745823	0.00119332	9.94431e-05	0.000149165	9.94431e-05	0.000596659	0.000845267	0.00213803	0.000696102	9.94431e-05	0.000348051	9.94431e-05	0.000198886	0	k__Bacteria;p__Proteobacteria;c__Gammaproteobacteria;o__Xanthomonadales;f__Sinobacteraceae;g__;s__
OTU_195	0.00424214	0.680029	0.000198886	0.000149165	9.94431e-05	9.94431e-05	0.000198886	0.000149165	4.97216e-05	9.94431e-05	0.000248608	0.000198886	4.97216e-05	4.97216e-05	4.97216e-05	0.000149165	4.97216e-05	0.00154137	0.00104415	0.00402745	4.97216e-05	0.000149165	4.97216e-05	9.94431e-05	4.97216e-05	4.97216e-05	k__Bacteria;p__Bacteroidetes;c__[Saprospirae];o__[Saprospirales];f__Chitinophagaceae
OTU_606	0.00408255	0.681772	0.000497216	0.00094471	0.00174025	0.000298329	0.000248608	0.000447494	0.000397772	0.000248608	0.000149165	0.000198886	0.000348051	9.94431e-05	0.000198886	0.000248608	0.000447494	0.000248608	0.000546937	0.000596659	0.000149165	0.000198886	0.000149165	0.000149165	9.94431e-05	0.000198886	k__Bacteria;p__Gemmatimonadetes;c__Gemmatimonadetes;o__KD8-87;f__;g__;s__
OTU_267	0.00384494	0.684475	0.000248608	0.000198886	0.000397772	0.000149165	0.000397772	0.000298329	0.000149165	4.97216e-05	0.000248608	0.000198886	9.94431e-05	0.000198886	9.94431e-05	4.97216e-05	9.94431e-05	0.00203858	0.000795545	0.000596659	0.000546937	0.00094471	0.000696102	0	0.000149165	4.97216e-05	k__Bacteria;p__Planctomycetes;c__Planctomycetia;o__Pirellulales;f__Pirellulaceae;g__;s__
OTU_1741	0.00373257	0.685802	0.00064638	0.00164081	0.000795545	0.00149165	0.000596659	0.00064638	0.000248608	0.000348051	0.00064638	0.000894988	0.000795545	0.00064638	4.97216e-05	0.000397772	0.000298329	9.94431e-05	0.000198886	0.000149165	4.97216e-05	0.000198886	9.94431e-05	0.000149165	4.97216e-05	9.94431e-05	k__Bacteria;p__Proteobacteria;c__Betaproteobacteria;o__Ellin6067;f__;g__;s__
OTU_185	0.00356776	0.687809	4.97216e-05	9.94431e-05	9.94431e-05	9.94431e-05	4.97216e-05	4.97216e-05	0.000795545	0.00263524	0.000745823	0.000198886	9.94431e-05	0	0.00109387	0.000845267	0.00119332	9.94431e-05	0.000198886	0.000248608	9.94431e-05	4.97216e-05	9.94431e-05	4.97216e-05	0.000248608	0.000149165	k__Bacteria;p__Bacteroidetes;c__Cytophagia;o__Cytophagales;f__Cytophagaceae
OTU_277	0.00354462	0.688097	0.000149165	0.000149165	4.97216e-05	0	4.97216e-05	4.97216e-05	9.94431e-05	9.94431e-05	9.94431e-05	0	4.97216e-05	4.97216e-05	0.000198886	0.000248608	9.94431e-05	0	4.97216e-05	4.97216e-05	0	9.94431e-05	4.97216e-05	0.000447494	0.00218775	0.00109387	k__Bacteria;p__Cyanobacteria;c__Chloroplast
OTU_337	0.00338943	0.69007	9.94431e-05	9.94431e-05	0.000149165	0.000248608	0.000248608	0	0	0.000149165	4.97216e-05	0.000198886	0.000149165	0.000248608	0	0	9.94431e-05	0.000994431	0.000248608	0.00129276	9.94431e-05	0	4.97216e-05	4.97216e-05	0	0	k__Bacteria;p__Bacteroidetes;c__[Saprospirae];o__[Saprospirales];f__Saprospiraceae;g__;s__
OTU_188	0.00325396	0.691855	0.000348051	0.000149165	0.000696102	0.00159109	0.000795545	0.00243636	0.000198886	0.000198886	0.000397772	0.000248608	0.0018397	0.000546937	0.000149165	4.97216e-05	0.000198886	0.000696102	0.000298329	0.000497216	0.000298329	0.000198886	0.000248608	0.000198886	4.97216e-05	9.94431e-05	k__Bacteria;p__Chlorobi;c__OPB56;o__;f__;g__;s__
OTU_92	0.00313378	0.693491	0.00601631	0.00154137	0.000795545	0.00263524	0.00258552	0.00243636	0.000696102	0.00134248	0.00119332	0.00298329	0.00233691	0.00258552	0.000397772	0.000348051	0.000348051	0.00308274	0.00397772	0.00462411	0.00338107	0.00278441	0.00427605	0.000546937	0.000795545	0.000546937	k__Bacteria;p__Proteobacteria;c__Alphaproteobacteria;o__;f__;g__;s__
OTU_1650	0.00307135	0.694361	0.00129276	0.00238663	0.000298329	0.00154137	0.00198886	0.00144193	0.000745823	0.00109387	0.00109387	0.000994431	0.000894988	0.000298329	0.000546937	0.00064638	0.00094471	0.000198886	0.00064638	0.000248608	0.000298329	0.000248608	0.000397772	0.000298329	0.000348051	0.000298329	k__Bacteria;p__Actinobacteria;c__Actinobacteria;o__Actinomycetales
OTU_366	0.00302049	0.695082	0	0.000149165	9.94431e-05	0.000596659	0.000298329	0.000497216	0.000149165	4.97216e-05	0	0.00094471	0.000248608	0.00144193	9.94431e-05	9.94431e-05	9.94431e-05	0.000248608	0.000149165	9.94431e-05	4.97216e-05	0	4.97216e-05	0	9.94431e-05	4.97216e-05	k__Bacteria;p__Chloroflexi;c__Chloroflexi;o__[Roseiflexales];f__[Kouleothrixaceae]
OTU_245	0.0029391	0.696256	0.000994431	0.000994431	0.000298329	0.000447494	0.000397772	0.000397772	0.000795545	0.00144193	0.00144193	0.00064638	0.000397772	0.000298329	0.000795545	0.00129276	0.00104415	0.000198886	0.000894988	0.000248608	0.000248608	0.000447494	0.000248608	0.000198886	0.000198886	4.97216e-05	k__Bacteria;p__Proteobacteria;c__Alphaproteobacteria;o__Rhizobiales;f__;g__;s__
OTU_635	0.00288371	0.69707	0.000248608	0.000248608	0.000149165	0.000397772	0.000298329	0.00094471	9.94431e-05	0.000149165	0	0.000596659	0.000348051	0.0011436	9.94431e-05	4.97216e-05	4.97216e-05	9.94431e-05	0	9.94431e-05	9.94431e-05	4.97216e-05	4.97216e-05	9.94431e-05	9.94431e-05	9.94431e-05	k__Bacteria;p__Chloroflexi;c__Anaerolineae;o__Caldilineales;f__Caldilineaceae;g__;s__
OTU_14	0.00281297	0.698129	0.00243636	0.00233691	0.00258552	0.00228719	0.00288385	0.00298329	0.00258552	0.00258552	0.00233691	0.0324682	0.0137729	0.0634944	0.00174025	0.00193914	0.00218775	0.00159109	0.00198886	0.0032319	0.00243636	0.0018397	0.00198886	0.000497216	0.000596659	0.000795545	k__Bacteria;p__Proteobacteria;c__Betaproteobacteria;o__Rhodocyclales;f__Rhodocyclaceae
OTU_165	0.00280035	0.698321	0.00268496	0.00094471	0.00119332	0.000348051	0.000298329	0.000497216	0.000795545	0.000546937	0.000497216	0.000198886	0.000248608	0.000248608	0.000447494	0.000546937	0.000497216	0.000348051	0.000348051	0.000348051	4.97216e-05	0.000248608	0.000198886	0.000198886	0.000198886	0.000348051	k__Bacteria;p__Gemmatimonadetes;c__Gemmatimonadetes
OTU_167	0.00277772	0.698666	0.000596659	0.000596659	0.000348051	0.000298329	0.000248608	0.000348051	0.00243636	0.00124304	0.00064638	9.94431e-05	9.94431e-05	0.000596659	0.00134248	0.00159109	0.00144193	0.000546937	0	0.000397772	0.000596659	0.000596659	0.000795545	9.94431e-05	9.94431e-05	0.000298329	k__Bacteria;p__Verrucomicrobia;c__[Pedosphaerae];o__[Pedosphaerales];f__R4-41B;g__;s__
OTU_862	0.00276478	0.698864	0.00268496	0.00208831	0.00109387	0.00193914	0.00169053	0.00198886	0.0025358	0.00452466	0.00223747	0.00134248	0.00174025	0.00178998	0.00109387	0.00178998	0.00129276	0.00248608	0.00223747	0.00353023	0.00154137	0.00169053	0.00154137	0.000497216	0.00064638	0.000546937	k__Bacteria;p__Proteobacteria;c__Gammaproteobacteria;o__Alteromonadales;f__125ds10;g__;s__
OTU_149	0.00271762	0.699593	0.000198886	0.000198886	0.000248608	0.000248608	0.000248608	0.000298329	0.000198886	0.000198886	0.000298329	0.00278441	0.00198886	0.00696102	0.000149165	0.000248608	0.000198886	0.000149165	0.000298329	0.000298329	0.000348051	0.000298329	0.000149165	0.000149165	9.94431e-05	9.94431e-05	k__Bacteria;p__Proteobacteria;c__Gammaproteobacteria
OTU_232	0.00263576	0.700884	0.000149165	0.000198886	0.000198886	0.000198886	0.000198886	4.97216e-05	4.97216e-05	4.97216e-05	0.000149165	0.000248608	0	0	4.97216e-05	4.97216e-05	0	0.00134248	0.000745823	0.00293357	4.97216e-05	4.97216e-05	4.97216e-05	0.000198886	9.94431e-05	0	k__Bacteria;p__Proteobacteria;c__Alphaproteobacteria;o__Rhodospirillales;f__Rhodospirillaceae
OTU_5021	0.00259523	0.701536	4.97216e-05	4.97216e-05	0	0.000198886	4.97216e-05	0.000149165	9.94431e-05	4.97216e-05	9.94431e-05	0.00278441	0.00129276	0.00064638	0	9.94431e-05	0.000149165	0.000149165	0.000348051	9.94431e-05	9.94431e-05	0	4.97216e-05	0	9.94431e-05	0.000149165	k__Bacteria;p__Proteobacteria;c__Alphaproteobacteria;o__Rhizobiales;f__Rhizobiaceae
OTU_247	0.00259131	0.701599	0.000149165	4.97216e-05	4.97216e-05	9.94431e-05	4.97216e-05	9.94431e-05	4.97216e-05	4.97216e-05	4.97216e-05	4.97216e-05	0	4.97216e-05	4.97216e-05	4.97216e-05	4.97216e-05	0.000894988	0.0011436	0.00313246	0.000149165	4.97216e-05	4.97216e-05	0	0.000198886	0	k__Bacteria;p__Bacteroidetes;c__VC2_1_Bac22;o__;f__;g__;s__
OTU_658	0.00257318	0.701894	0.000795545	0.0011436	0.00422633	0.00109387	0.00094471	0.00119332	0.0013922	0.000745823	0.00134248	0.0182975	0.0111376	0.00353023	0.00064638	0.000745823	0.000696102	0.000696102	0.00119332	0.0013922	0.00124304	0.000497216	0.00094471	0.000348051	0.000348051	0.000497216	k__Bacteria;p__Proteobacteria;c__Betaproteobacteria;o__Burkholderiales;f__Comamonadaceae
OTU_2144	0.00254398	0.702372	0.00208831	0.00328162	0.00517104	0.00109387	0.00124304	0.00104415	0.00228719	0.00104415	0.00174025	0.00875099	0.0036794	0.00412689	0.00094471	0.000795545	0.000994431	0.00208831	0.00303302	0.00586714	0.00164081	0.00164081	0.00109387	0.000248608	0.000447494	0.000447494	k__Bacteria;p__Proteobacteria;c__Betaproteobacteria;o__Burkholderiales;f__Comamonadaceae
OTU_953	0.00253917	0.702452	0	0	0	0.000198886	9.94431e-05	0.000149165	0	0	4.97216e-05	0.000447494	0.00124304	0.000447494	9.94431e-05	0.000149165	4.97216e-05	0.000248608	0	9.94431e-05	4.97216e-05	0	9.94431e-05	0	0	4.97216e-05	k__Bacteria;p__Verrucomicrobia;c__Verrucomicrobiae;o__Verrucomicrobiales;f__Verrucomicrobiaceae;g__Luteolibacter;s__
OTU_454	0.00251625	0.702831	0.00124304	0.00104415	0.000546937	0.000198886	0.000447494	0.000149165	0.000397772	0.00094471	0.00129276	0.000248608	0.000298329	0.000298329	0.00134248	0.00178998	0.000745823	0.000149165	0.000198886	0.000198886	0.000447494	0.00064638	0.00064638	0.000248608	9.94431e-05	0.000198886	k__Bacteria;p__Bacteroidetes;c__Flavobacteriia;o__Flavobacteriales;f__Cryomorphaceae;g__Fluviicola;s__
OTU_482	0.00221445	0.708115	9.94431e-05	9.94431e-05	0	0.000845267	0.00104415	0.000894988	9.94431e-05	4.97216e-05	4.97216e-05	0.000447494	0.000447494	0.00178998	0.000198886	0.000198886	4.97216e-05	0.000447494	0.000198886	0.000298329	9.94431e-05	4.97216e-05	9.94431e-05	4.97216e-05	4.97216e-05	4.97216e-05	k__Bacteria;p__Acidobacteria;c__[Chloracidobacteria];o__RB41;f__Ellin6075;g__;s__
OTU_296	0.00207455	0.710772	0.000994431	0.000994431	0.000348051	0.000298329	0.000149165	0.000149165	0.00064638	0.00223747	0.00134248	0.000298329	0.000149165	0.000248608	0.00094471	0.00174025	0.00233691	9.94431e-05	0.000149165	0.000596659	4.97216e-05	0	0.000348051	0.000198886	4.97216e-05	0.000149165	k__Bacteria;p__Bacteroidetes;c__Flavobacteriia;o__Flavobacteriales;f__Cryomorphaceae;g__Fluviicola;s__
OTU_259	0.00203528	0.711544	0.000198886	0.000348051	0.000994431	0.00124304	0.000745823	0.00064638	0.000149165	4.97216e-05	9.94431e-05	0.000745823	0.000994431	0.000198886	9.94431e-05	0.000149165	0.000397772	0.000198886	0.000149165	0.000149165	0.000149165	4.97216e-05	0.000149165	9.94431e-05	9.94431e-05	0	k__Bacteria;p__Proteobacteria;c__Gammaproteobacteria;o__Alteromonadales;f__[Chromatiaceae];g__Rheinheimera;s__
OTU_184	0.0020283	0.711683	0.000397772	0.000696102	0.000149165	0.000894988	0.00293357	0.00283413	0.000596659	0.00104415	0.000198886	0.000894988	0.00109387	0.00094471	0.000198886	0.000298329	0.000348051	0.0011436	0.0011436	0.00278441	0.000497216	0.000397772	0.000596659	0.000248608	0.000248608	0.000298329	k__Bacteria;p__Proteobacteria;c__Betaproteobacteria;o__Ellin6067;f__;g__;s__
OTU_85	0.00188814	0.714555	0.000447494	0.00348051	0.000546937	0.000397772	0.000198886	0.000348051	0.00064638	0.00094471	0.00094471	0.000198886	0.000149165	0.000198886	0.00109387	0.000397772	0.0011436	9.94431e-05	0.000198886	0.000397772	0.00293357	0.00288385	0.00357995	0.000198886	0.000198886	9.94431e-05	k__Bacteria;p__Actinobacteria;c__Actinobacteria;o__Actinomycetales
OTU_10	0.00173084	0.718	0.00338107	0.00238663	0.00169053	0.00293357	0.00313246	0.00263524	0.0032319	0.00149165	0.00258552	0.00218775	0.00298329	0.0032319	0.00129276	0.00228719	0.00159109	0.0036794	0.00278441	0.00278441	0.00283413	0.0025358	0.00233691	0.0298329	0.0267502	0.0821897	k__Bacteria;p__Verrucomicrobia;c__[Spartobacteria];o__[Chthoniobacterales];f__[Chthoniobacteraceae];g__Candidatus Xiphinematobacter;s__
OTU_82	0.00169773	0.718758	0.000447494	0.00064638	0.000546937	0.00134248	0.0013922	0.00129276	0.000447494	0.00064638	0.000447494	0.00353023	0.00497216	0.00343079	0.000447494	0.00064638	0.000497216	0.00571798	0.00213803	0.0104415	0.000447494	0.000397772	0.000546937	0.000497216	0.000497216	0.000397772	k__Bacteria;p__Proteobacteria;c__Gammaproteobacteria;o__Xanthomonadales;f__Xanthomonadaceae
OTU_586	0.0016591	0.719659	0	0	0	9.94431e-05	0	4.97216e-05	0.000198886	0	9.94431e-05	0.000497216	0.0011436	0.000348051	0	4.97216e-05	9.94431e-05	0	9.94431e-05	0	9.94431e-05	4.97216e-05	0	0	0	0	k__Bacteria;p__Proteobacteria;c__Betaproteobacteria
OTU_2969	0.00164991	0.719876	0.00104415	0.00104415	0.00134248	0.00273469	0.0025358	0.00308274	0.00064638	0.00094471	0.000795545	0.0096957	0.00825378	0.00546937	0.000497216	0.00064638	0.00094471	0.00785601	0.0249602	0.00815434	0.00064638	0.000894988	0.00094471	0.000795545	0.00109387	0.00104415	k__Bacteria;p__Proteobacteria;c__Alphaproteobacteria;o__Rhodobacterales;f__Rhodobacteraceae
OTU_459	0.0016128	0.720762	0.000447494	0.000298329	0.000198886	0.000397772	0.000546937	0.00064638	0.000298329	0.000198886	0.000298329	0.000596659	0.000447494	0.000546937	0.000248608	0.000348051	0.000298329	0.00303302	0.00273469	0.00800517	0.000348051	0.000198886	0.000198886	0.000198886	0	0.000198886	k__Bacteria;p__Proteobacteria;c__Betaproteobacteria;o__Ellin6067;f__;g__;s__
OTU_88	0.00157293	0.721733	0.00427605	0.00636436	0.00129276	0.000397772	0.000745823	0.00094471	0.00134248	0.00188942	0.00213803	0.000795545	0.000696102	0.000994431	0.000894988	0.00144193	0.00178998	0.000596659	0.00064638	0.00094471	0.00412689	0.003928	0.0043755	0.000696102	0.000894988	0.000546937	k__Bacteria;p__Actinobacteria;c__Actinobacteria;o__Actinomycetales;f__;g__;s__
OTU_460	0.0015009	0.723542	0	4.97216e-05	0	0	0.000149165	9.94431e-05	0	4.97216e-05	0	4.97216e-05	0	0	0	4.97216e-05	0	0.0013922	0.000447494	0.000596659	0.000198886	0	4.97216e-05	4.97216e-05	4.97216e-05	9.94431e-05	k__Bacteria;p__Verrucomicrobia;c__[Spartobacteria];o__[Chthoniobacterales];f__[Chthoniobacteraceae];g__;s__
OTU_214	0.00148636	0.723916	0.000198886	0.000248608	0.000149165	0.000497216	0.000149165	0.000298329	0.000745823	0.0013922	0.00094471	0.000546937	9.94431e-05	0.000497216	0.000596659	0.000994431	0.000596659	0.000298329	0.000447494	0.000149165	0.000298329	0.000149165	0.000298329	9.94431e-05	9.94431e-05	9.94431e-05	k__Bacteria;p__Proteobacteria;c__Gammaproteobacteria;o__Methylococcales;f__Methylococcaceae;g__Methylocaldum;s__
OTU_155	0.00147	0.72434	0.000149165	0.000149165	0	0.000248608	0.000149165	0.000298329	0.000745823	0.00208831	0.00164081	0.000298329	0.000198886	0.000198886	0.000795545	0.00109387	0.00258552	0.000149165	0.000198886	0.000198886	9.94431e-05	0.000198886	0.000149165	9.94431e-05	9.94431e-05	0.000248608	k__Bacteria;p__Verrucomicrobia;c__Opitutae;o__[Cerasicoccales];f__[Cerasicoccaceae];g__;s__
OTU_663	0.00145885	0.724632	4.97216e-05	4.97216e-05	4.97216e-05	0	0	4.97216e-05	0	0	0	0	4.97216e-05	9.94431e-05	4.97216e-05	0	9.94431e-05	0.000298329	0.000447494	0.00104415	0	0	4.97216e-05	0	4.97216e-05	0	k__Bacteria;p__Acidobacteria;c__Solibacteres;o__Solibacterales
OTU_23	0.00142213	0.725605	0.0243138	0.0140215	0.00745823	0.00462411	0.00318218	0.00427605	0.0117343	0.00974543	0.0111874	0.0103918	0.00989459	0.00785601	0.00362967	0.00631464	0.00745823	0.00218775	0.00298329	0.00492243	0.00616547	0.00348051	0.00482299	0.00094471	0.000994431	0.0011436	k__Bacteria;p__Proteobacteria;c__Betaproteobacteria;o__Burkholderiales;f__Comamonadaceae;g__Rubrivivax;s__
OTU_412	0.00137127	0.726989	0	4.97216e-05	4.97216e-05	4.97216e-05	4.97216e-05	4.97216e-05	4.97216e-05	4.97216e-05	4.97216e-05	0.0013922	0.000198886	0.00134248	0	4.97216e-05	0	0	0	0.000149165	9.94431e-05	4.97216e-05	0	0	4.97216e-05	0	k__Bacteria;p__Proteobacteria;c__Gammaproteobacteria;o__Methylococcales;f__Methylococcaceae
OTU_230	0.00134678	0.727671	9.94431e-05	4.97216e-05	0.000149165	0.000248608	0.000348051	9.94431e-05	9.94431e-05	0.000149165	9.94431e-05	4.97216e-05	9.94431e-05	0.000198886	9.94431e-05	9.94431e-05	4.97216e-05	0.00124304	0.000745823	0.00248608	9.94431e-05	0	0.000149165	0.000149165	9.94431e-05	9.94431e-05	k__Bacteria;p__Proteobacteria;c__Alphaproteobacteria;o__Kiloniellales;f__;g__;s__
OTU_159	0.0012678	0.729944	0.000845267	0.000696102	0.000198886	0.00333134	0.00159109	0.00109387	0.000447494	0.000397772	0.000596659	0.000298329	0.000348051	0.000497216	0.000248608	0.000298329	0.000198886	0.000198886	0.000198886	0.000397772	9.94431e-05	0.000198886	0.000298329	0.000198886	0.000149165	9.94431e-05	k__Bacteria;p__Proteobacteria;c__Gammaproteobacteria;o__Chromatiales
OTU_591	0.0012346	0.730935	0.00094471	0.00064638	0.000447494	0.00144193	0.000447494	0.00094471	0.000198886	0.000198886	0.000149165	0.000248608	0.000397772	0.000248608	0	0.000298329	9.94431e-05	0.000149165	9.94431e-05	0.000298329	9.94431e-05	9.94431e-05	4.97216e-05	0	4.97216e-05	9.94431e-05	k__Bacteria;p__Bacteroidetes;c__[Saprospirae];o__[Saprospirales];f__Chitinophagaceae;g__;s__
OTU_763	0.00118577	0.732434	0	9.94431e-05	0	4.97216e-05	0	0.000149165	0	4.97216e-05	0	0.000298329	9.94431e-05	0.000298329	0.000149165	4.97216e-05	0	0.00149165	0.000497216	0.00064638	4.97216e-05	4.97216e-05	4.97216e-05	0.000149165	4.97216e-05	4.97216e-05	k__Bacteria;p__Planctomycetes;c__OM190;o__CL500-15;f__;g__;s__
OTU_4198	0.00114456	0.73374	0.000149165	9.94431e-05	0.000248608	0.000248608	0.000198886	0.000198886	9.94431e-05	4.97216e-05	0.000298329	0	9.94431e-05	0.000397772	4.97216e-05	0	0.000198886	0.000248608	0	0.000149165	0.000149165	9.94431e-05	0.000149165	0.00178998	0.00159109	0.00467383	k__Bacteria;p__Verrucomicrobia;c__[Spartobacteria];o__[Chthoniobacterales];f__[Chthoniobacteraceae];g__Candidatus Xiphinematobacter;s__
OTU_461	0.00114344	0.733776	0.000198886	0.000198886	0.000248608	0.00119332	0.000845267	0.000348051	0	4.97216e-05	0.000149165	0.000198886	0.000248608	0.00064638	0	0	0	9.94431e-05	9.94431e-05	4.97216e-05	0.000149165	4.97216e-05	4.97216e-05	4.97216e-05	4.97216e-05	4.97216e-05	k__Bacteria;p__Bacteroidetes;c__[Saprospirae];o__[Saprospirales];f__Chitinophagaceae
OTU_203	0.00113456	0.734063	9.94431e-05	9.94431e-05	0.000248608	0.00149165	0.00134248	0.00129276	9.94431e-05	0.000447494	0.000248608	0.00094471	0.00094471	0.00268496	9.94431e-05	0.000248608	0.000198886	0.000894988	0.000198886	0.00134248	9.94431e-05	0.000348051	0.000149165	4.97216e-05	4.97216e-05	0.000198886	k__Bacteria;p__Nitrospirae;c__Nitrospira;o__Nitrospirales;f__Nitrospiraceae;g__Nitrospira;s__
OTU_234	0.00109695	0.735299	0.000397772	0.000348051	0.000248608	0.000198886	0.000149165	0.000149165	0.000497216	0.00064638	0.00164081	0.000149165	0.000149165	9.94431e-05	0.00064638	0.00119332	0.00129276	0	9.94431e-05	4.97216e-05	0.000348051	0.000397772	0.000198886	0.000149165	0	9.94431e-05	k__Bacteria;p__Actinobacteria;c__Acidimicrobiia;o__Acidimicrobiales;f__C111;g__;s__
OTU_421	0.00109378	0.735405	0.000397772	4.97216e-05	0.000248608	0.000198886	0.000149165	0.000149165	0.000198886	0.000198886	0.000248608	0.000198886	9.94431e-05	0.000198886	9.94431e-05	0.000198886	4.97216e-05	0.00203858	0.000894988	0.000696102	0.00064638	0.000546937	0.000497216	4.97216e-05	4.97216e-05	4.97216e-05	k__Bacteria;p__Planctomycetes;c__OM190;o__CL500-15;f__;g__;s__
OTU_76	0.0010791	0.735898	0.000696102	0.000745823	0.000795545	0.000596659	0.000994431	0.00104415	0.000894988	0.000546937	0.000795545	0.00870127	0.00954654	0.00203858	0.000894988	0.00159109	0.000397772	0.00109387	0.00144193	0.000994431	0.000994431	0.000795545	0.000845267	0.000348051	0.000546937	0.000348051	k__Bacteria;p__Proteobacteria;c__Betaproteobacteria;o__Burkholderiales;f__Oxalobacteraceae;g__Ralstonia;s__
OTU_352	0.00104973	0.736903	9.94431e-05	9.94431e-05	0.000198886	9.94431e-05	0	0	9.94431e-05	0.000149165	9.94431e-05	9.94431e-05	0	9.94431e-05	0	9.94431e-05	0.000149165	0.00208831	0.00104415	0.000596659	4.97216e-05	0.000198886	4.97216e-05	0	0	4.97216e-05	k__Bacteria;p__Chloroflexi;c__Anaerolineae;o__SBR1031;f__A4b;g__;s__
OTU_231	0.00104889	0.736932	0.000696102	0.000696102	0.000198886	0.00169053	0.00144193	0.00109387	0.00164081	0.000497216	0.00104415	0.000596659	0.00134248	0.00218775	0.000198886	0.000447494	0.000298329	0.000298329	0.000348051	0.000348051	4.97216e-05	0.000348051	0.000298329	4.97216e-05	0.000198886	0.000447494	k__Bacteria;p__Verrucomicrobia;c__[Pedosphaerae];o__[Pedosphaerales];f__auto67_4W;g__;s__
OTU_194	0.000988731	0.739067	0.000497216	0.000248608	9.94431e-05	0.000149165	0.000248608	0.000248608	0.00134248	0.00144193	0.00278441	4.97216e-05	0.000248608	0.000298329	0.000397772	0.000845267	0.00198886	0.000198886	0.000198886	0.000298329	0.000149165	4.97216e-05	0.000149165	4.97216e-05	0.000149165	9.94431e-05	k__Bacteria;p__Verrucomicrobia;c__Opitutae;o__[Cerasicoccales];f__[Cerasicoccaceae];g__;s__
OTU_116	0.000980475	0.739369	0.000198886	9.94431e-05	0.000298329	0.000447494	0.000298329	0.000348051	0.000198886	0.000149165	0.000248608	0.000298329	0.000994431	0.000397772	0.000198886	0.000298329	9.94431e-05	0.00770684	0.00407717	0.00198886	0.000348051	0.000149165	0.000397772	9.94431e-05	0.000149165	0.000447494	k__Bacteria;p__Verrucomicrobia;c__Verrucomicrobiae;o__Verrucomicrobiales;f__Verrucomicrobiaceae;g__Luteolibacter;s__
OTU_48	0.000966723	0.739876	0.000397772	0.000447494	0.000546937	0.000845267	0.000795545	0.00064638	0.00243636	0.00720963	0.00308274	0.000397772	0.000497216	0.000696102	0.00238663	0.00452466	0.0032319	0.000497216	0.000696102	0.000795545	0.000298329	0.000348051	0.000497216	0.000596659	0.000447494	0.000447494	k__Bacteria
OTU_382	0.000928469	0.741319	0.00223747	0.00532021	0.00263524	0.0018397	0.00174025	0.00178998	0.00263524	0.00273469	0.00333134	0.00154137	0.00174025	0.00218775	0.000994431	0.0013922	0.0013922	0.00452466	0.00432578	0.00860183	0.00477327	0.00343079	0.00546937	0.000596659	0.000745823	0.000497216	k__Bacteria;p__Proteobacteria;c__Gammaproteobacteria;o__Xanthomonadales;f__Sinobacteraceae;g__;s__
OTU_478	0.000898329	0.742492	9.94431e-05	4.97216e-05	0	9.94431e-05	0	0.000198886	0	0	0.000149165	4.97216e-05	0	9.94431e-05	0	0	9.94431e-05	0.000497216	0.00119332	0.000447494	0	0	0	9.94431e-05	0.000149165	0	k__Bacteria;p__Proteobacteria;c__Deltaproteobacteria;o__;f__;g__;s__
OTU_79	0.000805556	0.746324	0.00372912	0.0013922	0.00129276	0.000745823	0.000696102	0.000596659	0.000845267	0.00094471	0.000845267	0.000546937	0.000546937	0.000894988	0.000497216	0.000397772	0.000397772	0.000745823	0.000894988	0.00104415	0.00298329	0.00178998	0.00268496	0.000149165	0.000149165	4.97216e-05	k__Bacteria;p__Proteobacteria;c__Betaproteobacteria
OTU_417	0.000800354	0.74655	0.000248608	0.000198886	0.000298329	0	9.94431e-05	4.97216e-05	0.000198886	0.00064638	0.000298329	9.94431e-05	4.97216e-05	4.97216e-05	0.000497216	0.00119332	0.000596659	0.000248608	9.94431e-05	4.97216e-05	9.94431e-05	0	9.94431e-05	0.000745823	0.000546937	0.00124304	k__Bacteria;p__Cyanobacteria;c__Chloroplast;o__Stramenopiles;f__;g__;s__
OTU_346	0.00074992	0.748805	0.000149165	0.000248608	9.94431e-05	4.97216e-05	4.97216e-05	9.94431e-05	0.000298329	0.00124304	0.00119332	9.94431e-05	0.000248608	0.000149165	9.94431e-05	4.97216e-05	9.94431e-05	9.94431e-05	0.000198886	9.94431e-05	4.97216e-05	0.000149165	4.97216e-05	9.94431e-05	4.97216e-05	4.97216e-05	k__Bacteria;p__Proteobacteria
OTU_87	0.000745823	0.748994	0.000497216	0.000348051	0.000397772	0.000497216	0.000447494	0.000546937	0.000348051	0.000298329	0.000298329	0.000348051	0.000348051	0.000447494	0.000198886	0.000248608	0.000397772	0.00353023	0.0096957	0.00338107	0.000447494	0.000298329	0.000397772	9.94431e-05	0.000149165	0.000397772	k__Bacteria;p__Chloroflexi;c__Anaerolineae;o__SBR1031;f__A4b;g__;s__
OTU_4364	0.00074247	0.749149	0.000149165	9.94431e-05	0.000198886	0.00288385	0.00104415	0.00129276	0.000198886	4.97216e-05	0.000248608	0.00064638	0.00064638	0.000149165	9.94431e-05	4.97216e-05	9.94431e-05	9.94431e-05	9.94431e-05	9.94431e-05	0.000198886	9.94431e-05	0.000149165	4.97216e-05	4.97216e-05	0.000149165	k__Bacteria;p__Proteobacteria;c__Betaproteobacteria
OTU_211	0.000738933	0.749314	0.000447494	0.000447494	0.000298329	9.94431e-05	0	4.97216e-05	9.94431e-05	0.000546937	0.000447494	0.000149165	0.000348051	0.000149165	0.000298329	0.000546937	0.000596659	0.000447494	0.000198886	0.000149165	0.00193914	0.00541965	0.00243636	4.97216e-05	9.94431e-05	0.000596659	k__Bacteria;p__Cyanobacteria;c__Chloroplast;o__Stramenopiles;f__;g__;s__
OTU_489	0.00071501	0.750443	9.94431e-05	4.97216e-05	0	4.97216e-05	0.000198886	0.000149165	9.94431e-05	4.97216e-05	0	0.0011436	0.000298329	0.00104415	9.94431e-05	4.97216e-05	9.94431e-05	0.000497216	0.000248608	0.000248608	9.94431e-05	0	0	4.97216e-05	9.94431e-05	0	k__Bacteria;p__Acidobacteria;c__[Chloracidobacteria];o__PK29;f__;g__;s__
OTU_150	0.000706532	0.75085	9.94431e-05	0.000198886	0.000149165	0.000894988	0.00178998	0.00124304	0.000298329	0.000149165	0.000149165	0.00119332	0.00357995	0.00134248	0.000149165	0.000248608	0.000248608	0.000198886	0.000348051	0.000298329	0.000149165	0.000248608	0.000149165	0.000149165	9.94431e-05	9.94431e-05	k__Bacteria;p__Proteobacteria;c__Deltaproteobacteria;o__Spirobacillales;f__;g__;s__
OTU_2615	0.000659132	0.75321	0.00124304	0.00094471	0.000198886	0.000596659	0.000397772	0.000348051	0.000348051	0.000497216	0.000149165	0.000348051	0.000248608	9.94431e-05	9.94431e-05	0.000149165	0.000149165	0.000696102	0.00124304	0.000894988	0.000198886	4.97216e-05	9.94431e-05	9.94431e-05	4.97216e-05	0	k__Bacteria;p__Bacteroidetes;c__[Saprospirae];o__[Saprospirales];f__Chitinophagaceae;g__;s__
OTU_2363	0.000650773	0.753641	0.000397772	0.000397772	0.000447494	4.97216e-05	0.000149165	0	0.000447494	0.00109387	0.000696102	4.97216e-05	9.94431e-05	0.000149165	0.000696102	0.00104415	0.000298329	0.000149165	4.97216e-05	0.000198886	9.94431e-05	4.97216e-05	0.000248608	0	0.000149165	4.97216e-05	k__Bacteria;p__Bacteroidetes;c__Flavobacteriia;o__Flavobacteriales;f__Cryomorphaceae;g__Fluviicola;s__
OTU_45	0.000640382	0.754183	0.000397772	0.000397772	0.000248608	0.000596659	0.000894988	0.00119332	0.000596659	0.000696102	0.000348051	0.00104415	0.000596659	0.000845267	0.000198886	0.000397772	0.000348051	0.00512132	0.0170048	0.00725935	0.000397772	0.000497216	0.000546937	0.000447494	0.000447494	0.000497216	k__Bacteria;p__Proteobacteria;c__Deltaproteobacteria;o__Myxococcales;f__Nannocystaceae;g__Plesiocystis;s__
OTU_240	0.000619158	0.755314	0.000298329	9.94431e-05	0.000248608	0.000348051	9.94431e-05	9.94431e-05	0.000149165	9.94431e-05	0.000149165	4.97216e-05	4.97216e-05	4.97216e-05	0.000198886	4.97216e-05	9.94431e-05	0.00258552	0.000596659	0.00193914	4.97216e-05	0.000198886	9.94431e-05	0	9.94431e-05	4.97216e-05	k__Bacteria;p__Cyanobacteria;c__Synechococcophycideae;o__Synechococcales;f__Acaryochloridaceae;g__;s__
OTU_353	0.000601586	0.756276	9.94431e-05	9.94431e-05	9.94431e-05	0.000149165	9.94431e-05	4.97216e-05	9.94431e-05	9.94431e-05	9.94431e-05	0	0	0	4.97216e-05	0.000149165	9.94431e-05	0.000447494	0.00203858	0.0013922	4.97216e-05	4.97216e-05	9.94431e-05	0	0	4.97216e-05	k__Bacteria;p__Bacteroidetes
OTU_89	0.000582844	0.757328	0.000894988	0.00094471	0.000596659	0.0011436	0.00164081	0.00129276	0.000348051	0.000447494	0.000596659	0.00904932	0.00377884	0.00188942	0.000298329	0.000497216	0.000298329	0.00502188	0.00939737	0.00532021	0.000447494	0.00064638	0.000497216	0.00223747	0.00417661	0.00278441	k__Bacteria;p__Proteobacteria;c__Alphaproteobacteria;o__Rhodobacterales;f__Rhodobacteraceae;g__Rhodobacter;s__
OTU_80	0.000571552	0.757976	0.00681185	0.00442522	0.00213803	0.00353023	0.00144193	0.00164081	0.00452466	0.00104415	0.00203858	0.000447494	0.00094471	0.000497216	0.000894988	0.0011436	0.0011436	0.00178998	0.000546937	0.0011436	0.00536993	0.00840294	0.00606603	0.000546937	0.000696102	0.000696102	k__Bacteria;p__Cyanobacteria;c__Synechococcophycideae;o__Synechococcales;f__Synechococcaceae;g__Synechococcus;s__
OTU_219	0.000566335	0.758279	0.00159109	0.000745823	0.00064638	0.000149165	0.000149165	0.000248608	0.00064638	0.000795545	0.000994431	0.000198886	0.000248608	0.000149165	0.000696102	0.00094471	0.000894988	0.000248608	0.000348051	0.000447494	0.000248608	0.000447494	0.000447494	4.97216e-05	9.94431e-05	9.94431e-05	k__Bacteria;p__Bacteroidetes;c__Sphingobacteriia;o__Sphingobacteriales;f__;g__;s__
OTU_1633	0.000562545	0.758501	4.97216e-05	0	0	4.97216e-05	0	0	0	0	4.97216e-05	9.94431e-05	0.000149165	4.97216e-05	0	0.000149165	4.97216e-05	0.000596659	0.00169053	0.000596659	0	4.97216e-05	0	9.94431e-05	4.97216e-05	0	k__Bacteria;p__Proteobacteria;c__Alphaproteobacteria;o__Rhodobacterales;f__Rhodobacteraceae;g__Rhodobacter;s__
OTU_148	0.000558898	0.758715	0.000298329	0.000497216	0.000348051	0.000745823	0.000894988	0.000795545	0.000696102	0.000745823	0.00154137	0.00159109	0.00119332	0.000696102	0.000596659	0.00119332	0.000696102	0.00119332	0.000795545	0.000994431	0.000149165	0.000348051	0.000149165	0.000248608	0.000248608	9.94431e-05	k__Bacteria;p__Proteobacteria;c__Gammaproteobacteria;o__Methylococcales;f__Methylococcaceae;g__Methylocaldum;s__
OTU_553	0.000542569	0.75969	0	4.97216e-05	4.97216e-05	0.00129276	0.000447494	0.00193914	4.97216e-05	4.97216e-05	4.97216e-05	9.94431e-05	0.000348051	0.000198886	4.97216e-05	4.97216e-05	0	4.97216e-05	0.000198886	4.97216e-05	0	0	4.97216e-05	4.97216e-05	4.97216e-05	0.000149165	k__Bacteria;p__Proteobacteria;c__Deltaproteobacteria;o__Spirobacillales;f__;g__;s__
OTU_560	0.000512731	0.761538	4.97216e-05	0.000149165	4.97216e-05	0.000198886	0.000149165	0	0	0	9.94431e-05	4.97216e-05	4.97216e-05	4.97216e-05	0.000198886	4.97216e-05	0.000149165	0.00174025	0.000894988	0.000497216	4.97216e-05	4.97216e-05	4.97216e-05	0	0	4.97216e-05	k__Bacteria;p__Cyanobacteria;c__Oscillatoriophycideae;o__Chroococcales;f__Gomphosphaeriaceae;g__Synechocystis;s__aquatilis
OTU_243	0.000504729	0.762049	9.94431e-05	0.000149165	0.000149165	0.000397772	9.94431e-05	0.000447494	0.000248608	0.000546937	0.000397772	0.000447494	0.00064638	0.00064638	0.000745823	0.00109387	0.000497216	9.94431e-05	0.000198886	0.000149165	0	9.94431e-05	9.94431e-05	0.000198886	0.000198886	4.97216e-05	k__Bacteria;p__Proteobacteria;c__Gammaproteobacteria;o__Methylococcales
OTU_1303	0.000503855	0.762105	0.00154137	0.00556881	0.00656325	0.00313246	0.00278441	0.00228719	0.00596659	0.00387828	0.00422633	0.00427605	0.00512132	0.00362967	0.0025358	0.00318218	0.0043755	0.000845267	0.00149165	0.00154137	0.00094471	0.000745823	0.0011436	0.000447494	0.000546937	0.000546937	k__Bacteria;p__Proteobacteria;c__Betaproteobacteria;o__Burkholderiales;f__Comamonadaceae
OTU_869	0.000478871	0.763748	0	4.97216e-05	4.97216e-05	0.000397772	0.000298329	0.000149165	9.94431e-05	9.94431e-05	9.94431e-05	0.000596659	0.000248608	0.000298329	4.97216e-05	4.97216e-05	0	0.000497216	0.000497216	0.00109387	4.97216e-05	4.97216e-05	0	0.000447494	0.00064638	0.000447494	k__Bacteria;p__Proteobacteria;c__Alphaproteobacteria;o__Rhizobiales;f__Hyphomicrobiaceae;g__Hyphomicrobium;s__
OTU_476	0.00047311	0.764137	0.000149165	0.000248608	0.000348051	4.97216e-05	9.94431e-05	0.000298329	9.94431e-05	0.000198886	9.94431e-05	0.000149165	9.94431e-05	0.000149165	0.000149165	4.97216e-05	9.94431e-05	0.000497216	0.000596659	0.00119332	4.97216e-05	0	9.94431e-05	0	4.97216e-05	0	k__Bacteria;p__Proteobacteria;c__Betaproteobacteria;o__;f__;g__;s__
OTU_186	0.000468316	0.764464	0.000248608	0.000298329	0.000248608	0.000447494	0.000546937	0.000745823	0.000149165	0.000546937	0.000447494	0.00129276	0.000845267	0.00208831	0.000149165	0.000149165	0.000298329	0.00487271	0.00333134	0.00144193	0.000149165	4.97216e-05	0.000298329	9.94431e-05	9.94431e-05	0.000298329	k__Bacteria;p__Chloroflexi;c__Chloroflexi;o__[Roseiflexales];f__;g__;s__
OTU_99	0.000459108	0.765101	0.000248608	0.000348051	0.000248608	0.000348051	0.000198886	0.000198886	0.000348051	0.000447494	0.000397772	0.000447494	0.000248608	0.000298329	4.97216e-05	0.000298329	0.000149165	0.00865155	0.00298329	0.00377884	0.000348051	9.94431e-05	0.000298329	4.97216e-05	4.97216e-05	0	k__Bacteria;p__Bacteroidetes;c__[Saprospirae];o__[Saprospirales];f__Chitinophagaceae;g__;s__
OTU_122	0.000424034	0.767627	0.0018397	0.00258552	0.00134248	0.0050716	0.00362967	0.00353023	0.0069113	0.00308274	0.00452466	0.0069113	0.00636436	0.0142204	0.00188942	0.00188942	0.00144193	0.00104415	0.00154137	0.00178998	0.00129276	0.00094471	0.0013922	0.000298329	0.000894988	0.000497216	k__Bacteria;p__Proteobacteria;c__Betaproteobacteria;o__Rhodocyclales;f__Rhodocyclaceae;g__Dechloromonas;s__
OTU_425	0.000402736	0.769249	9.94431e-05	4.97216e-05	0	0.00064638	0.0011436	0.000596659	9.94431e-05	4.97216e-05	0.000795545	4.97216e-05	4.97216e-05	0.000198886	0	0	0	9.94431e-05	9.94431e-05	9.94431e-05	0	0	0	4.97216e-05	9.94431e-05	0	k__Bacteria;p__Proteobacteria;c__Gammaproteobacteria
OTU_957	0.000400117	0.769454	0.000745823	0.00198886	0.00154137	0.00248608	0.00203858	0.00159109	0.000497216	0.000845267	0.000596659	0.00551909	0.00283413	0.00213803	0.000447494	0.000696102	0.00109387	0.00159109	0.00213803	0.00174025	0.000497216	0.000497216	0.000397772	0.000248608	0.000497216	0.000248608	k__Bacteria;p__Proteobacteria;c__Alphaproteobacteria;o__Rhizobiales
OTU_5238	0.000398148	0.769608	0.0018397	0.00223747	0.00193914	0.00442522	0.00641408	0.00427605	0.00263524	0.0050716	0.00382856	0.00954654	0.0076074	0.00353023	0.00243636	0.00492243	0.0043755	0.00377884	0.00427605	0.00536993	0.00109387	0.000795545	0.000894988	0.0011436	0.00223747	0.0011436	k__Bacteria;p__Proteobacteria;c__Alphaproteobacteria;o__Sphingomonadales;f__Sphingomonadaceae;g__Novosphingobium;s__
OTU_51	0.000373002	0.77164	0.00810461	0.00402745	0.0138723	0.00174025	0.000994431	0.00144193	0.0025358	0.00159109	0.00144193	0.000596659	0.00134248	0.00119332	0.00109387	0.00154137	0.00124304	0.00149165	0.00169053	0.00203858	0.00064638	0.000795545	0.00104415	0.000546937	0.000596659	0.000696102	k__Bacteria;p__Chlorobi;c__OPB56;o__;f__;g__;s__
OTU_197	0.000356933	0.773001	0.00203858	0.00228719	0.000397772	0.000198886	9.94431e-05	0.000198886	0.00064638	0.000745823	0.000397772	0.000149165	0.000248608	0.000149165	0.000149165	0.000248608	0.000397772	0.000149165	0.000198886	0.000397772	0.00169053	0.00164081	0.00258552	9.94431e-05	0.000149165	0.000198886	k__Bacteria;p__Planctomycetes;c__Phycisphaerae;o__Phycisphaerales;f__;g__;s__
OTU_33	0.000337935	0.774678	0.00745823	0.00556881	0.00477327	0.00208831	0.00144193	0.00164081	0.00387828	0.00178998	0.00357995	0.0013922	0.00169053	0.00159109	0.000845267	0.00178998	0.00129276	0.00328162	0.00124304	0.0011436	0.00472355	0.00387828	0.0069113	0.00178998	0.00144193	0.0032319	k__Bacteria;p__Verrucomicrobia;c__[Spartobacteria];o__[Chthoniobacterales];f__[Chthoniobacteraceae];g__Candidatus Xiphinematobacter;s__
OTU_35	0.00033761	0.774708	0.00104415	0.00104415	0.00119332	0.00154137	0.00238663	0.00223747	0.00228719	0.00178998	0.00169053	0.00243636	0.00104415	0.00134248	0.00372912	0.0011436	0.00124304	0.000745823	0.00149165	0.00119332	0.00203858	0.00208831	0.00293357	0.00487271	0.00467383	0.0043755	k__Bacteria;p__Proteobacteria;c__Gammaproteobacteria;o__Pseudomonadales;f__Pseudomonadaceae;g__Pseudomonas;s__fragi
OTU_4958	0.000337248	0.77474	0.00581742	0.00711018	0.00298329	0.0013922	0.00109387	0.00159109	0.00198886	0.00188942	0.00198886	0.003928	0.0032319	0.00233691	0.00104415	0.00119332	0.00119332	0.000795545	0.00134248	0.00248608	0.00268496	0.00178998	0.00238663	0.000348051	0.000248608	0.000397772	k__Bacteria;p__Proteobacteria;c__Betaproteobacteria;o__Burkholderiales;f__Comamonadaceae
OTU_244	0.000319495	0.776385	9.94431e-05	9.94431e-05	0.000198886	0.000248608	0.000348051	0.000298329	0.000149165	9.94431e-05	9.94431e-05	0.00208831	0.000845267	0.00303302	0.000149165	4.97216e-05	0	0.000149165	0	9.94431e-05	0.000149165	0.000149165	0.000198886	0	4.97216e-05	4.97216e-05	k__Bacteria;p__Proteobacteria;c__Gammaproteobacteria;o__Methylococcales;f__Crenotrichaceae;g__Crenothrix;s__
OTU_239	0.000316262	0.776693	9.94431e-05	4.97216e-05	0.000149165	0.000248608	0.000149165	0.000397772	9.94431e-05	4.97216e-05	9.94431e-05	9.94431e-05	0.000198886	9.94431e-05	4.97216e-05	0	9.94431e-05	0.00318218	0.00119332	0.0013922	4.97216e-05	4.97216e-05	4.97216e-05	9.94431e-05	4.97216e-05	0.000149165	k__Bacteria;p__Verrucomicrobia;c__[Spartobacteria];o__[Chthoniobacterales];f__[Chthoniobacteraceae]
OTU_112	0.000315173	0.776797	0.00129276	0.000894988	0.00164081	0.000248608	0.000298329	0.000248608	0.00124304	0.00154137	0.00144193	0.000397772	0.000348051	0.000248608	0.000795545	0.00109387	0.000596659	0.000397772	0.000348051	0.000546937	0.00094471	0.00064638	0.00203858	0.000198886	0.000149165	9.94431e-05	k__Bacteria;p__Bacteroidetes;c__[Saprospirae];o__[Saprospirales];f__Saprospiraceae;g__;s__
OTU_193	0.000315052	0.776809	0.000198886	9.94431e-05	4.97216e-05	0.000298329	0.000298329	0	9.94431e-05	0.000198886	0.000149165	0.000298329	9.94431e-05	0.000348051	4.97216e-05	9.94431e-05	0.000149165	0.0013922	0.00412689	0.00178998	0.000149165	0	0.000149165	0.000248608	0.000198886	9.94431e-05	k__Bacteria;p__Proteobacteria;c__Alphaproteobacteria;o__Rhodobacterales;f__Hyphomonadaceae;g__;s__
OTU_401	0.000299294	0.778353	4.97216e-05	9.94431e-05	0	0.00119332	0.000596659	0.000696102	4.97216e-05	0.000149165	0	0.000149165	0.000348051	0.000894988	4.97216e-05	0	9.94431e-05	0	0.000149165	9.94431e-05	0	0	4.97216e-05	0	9.94431e-05	4.97216e-05	k__Bacteria;p__Acidobacteria;c__Acidobacteria-6;o__iii1-15;f__;g__;s__
OTU_108	0.000288225	0.77948	0.00174025	0.00178998	0.00124304	0.0025358	0.00268496	0.00288385	0.00174025	0.00149165	0.00218775	0.00298329	0.00159109	0.00178998	0.000696102	0.00193914	0.00169053	0.00273469	0.00387828	0.00303302	0.000795545	0.000845267	0.000745823	0.00159109	0.00382856	0.00268496	k__Bacteria;p__Proteobacteria;c__Alphaproteobacteria;o__Rhizobiales;f__Methylocystaceae;g__Methylosinus;s__
OTU_236	0.000261801	0.782328	0.000348051	0.000298329	0.000248608	0.000447494	0.000348051	0.000447494	4.97216e-05	4.97216e-05	9.94431e-05	0.000149165	0.000348051	0.000149165	4.97216e-05	9.94431e-05	9.94431e-05	0.00134248	0.000596659	0.00203858	4.97216e-05	0	9.94431e-05	4.97216e-05	4.97216e-05	9.94431e-05	k__Bacteria;p__Proteobacteria;c__Alphaproteobacteria
OTU_418	0.000261787	0.782329	0.000198886	0.000348051	0.000298329	0.000745823	0.000696102	0.000795545	0.000198886	0.000149165	0.000149165	0.00238663	0.000845267	0.00288385	0.000248608	0.000397772	0.000397772	9.94431e-05	9.94431e-05	0.000149165	0.000447494	0.000198886	0.000348051	0.000149165	9.94431e-05	0	k__Bacteria;p__Actinobacteria;c__Actinobacteria;o__Actinomycetales;f__Kineosporiaceae;g__;s__
OTU_71	0.000258521	0.782698	0.00109387	0.00134248	0.00129276	0.00119332	0.0018397	0.00203858	0.00213803	0.00178998	0.00178998	0.000994431	0.000994431	0.00134248	0.00313246	0.00144193	0.00164081	0.000745823	0.00198886	0.00119332	0.00213803	0.00278441	0.00178998	0.00467383	0.00422633	0.00338107	k__Bacteria;p__Proteobacteria;c__Gammaproteobacteria;o__Pseudomonadales;f__Pseudomonadaceae;g__Pseudomonas
OTU_235	0.000256432	0.782936	0.00149165	0.000795545	0.00263524	0.000198886	0.000248608	0.000198886	0.000248608	0.000348051	0.000397772	9.94431e-05	9.94431e-05	9.94431e-05	0.000248608	0.000198886	0	9.94431e-05	0.000198886	0.000447494	0.000298329	0.000149165	0.000248608	9.94431e-05	0.000149165	0.000298329	k__Bacteria;p__Bacteroidetes;c__[Saprospirae];o__[Saprospirales];f__Saprospiraceae;g__;s__
OTU_173	0.000240997	0.784747	0.000447494	0.000248608	0.000248608	0.000198886	0.000149165	0.000248608	0.000745823	0.000795545	0.000795545	0.000248608	9.94431e-05	0.000397772	0.00064638	0.00174025	0.00164081	0.000397772	0.000198886	0.000298329	0.000198886	0.000198886	0.000298329	0.000149165	0.000198886	9.94431e-05	k__Bacteria;p__Planctomycetes;c__Planctomycetia;o__Gemmatales;f__Gemmataceae;g__;s__
OTU_474	0.000220655	0.787292	0	4.97216e-05	4.97216e-05	4.97216e-05	4.97216e-05	9.94431e-05	0	9.94431e-05	9.94431e-05	0	0	9.94431e-05	0	9.94431e-05	9.94431e-05	0.000397772	0.000845267	0.00129276	4.97216e-05	9.94431e-05	0.000149165	4.97216e-05	4.97216e-05	0	k__Bacteria;p__Bacteroidetes;c__Cytophagia;o__Cytophagales
OTU_2318	0.000203054	0.78966	0.000198886	0.000149165	0.000149165	0.00119332	0.000546937	0.000894988	0.000298329	0.000348051	0.000348051	0.000397772	0.000248608	0.000795545	0.000149165	0.000149165	9.94431e-05	0.000149165	4.97216e-05	9.94431e-05	0.000348051	0.000198886	0.000198886	9.94431e-05	9.94431e-05	0	k__Bacteria;p__Proteobacteria;c__Betaproteobacteria;o__Rhodocyclales;f__Rhodocyclaceae
OTU_4899	0.000192832	0.791117	0.000546937	0.000894988	0.00144193	9.94431e-05	0.000149165	0.000149165	9.94431e-05	0.000198886	0.000248608	4.97216e-05	9.94431e-05	0.000149165	0.000198886	0.00064638	0.000348051	9.94431e-05	9.94431e-05	0.000348051	9.94431e-05	4.97216e-05	0	9.94431e-05	9.94431e-05	0.000149165	k__Bacteria;p__Bacteroidetes;c__[Saprospirae];o__[Saprospirales];f__Saprospiraceae;g__;s__
OTU_396	0.000192538	0.79116	4.97216e-05	4.97216e-05	0.000149165	0.000397772	0.000298329	0.000298329	9.94431e-05	0.000248608	0.000149165	0.000596659	0.000696102	0.000596659	9.94431e-05	0.000149165	4.97216e-05	0.000497216	0.000447494	0.00119332	0	4.97216e-05	4.97216e-05	0	9.94431e-05	9.94431e-05	k__Bacteria;p__Proteobacteria;c__Alphaproteobacteria;o__Rhodospirillales;f__Acetobacteraceae
OTU_135	0.000189021	0.791677	0.000248608	9.94431e-05	0.000149165	0.000198886	0.000149165	9.94431e-05	4.97216e-05	0.000248608	0.000149165	0.000198886	0.000248608	0.000248608	0.000149165	9.94431e-05	9.94431e-05	0.00417661	0.0013922	0.00527049	9.94431e-05	9.94431e-05	0.000149165	0.000198886	0.000198886	0.000149165	k__Bacteria;p__Bacteroidetes
OTU_303	0.000177152	0.793486	0.00243636	0.00243636	0.000795545	0.000198886	0	9.94431e-05	0.000198886	0.000248608	0.000397772	9.94431e-05	0.000198886	9.94431e-05	4.97216e-05	0.000248608	0.000198886	0.000149165	9.94431e-05	0.000248608	0.000348051	0.000149165	0.000198886	0	9.94431e-05	0.000198886	k__Bacteria;p__Bacteroidetes;c__[Saprospirae];o__[Saprospirales];f__Chitinophagaceae;g__;s__
OTU_143	0.000175999	0.793667	0.00109387	0.00064638	0.000397772	0.000696102	0.00064638	0.000546937	0.000596659	0.000497216	0.000596659	0.000397772	0.000397772	0.000696102	0.000198886	0.000397772	0.000397772	0.00243636	0.000497216	0.000894988	0.00268496	0.00601631	0.0036794	4.97216e-05	0.000149165	0.000248608	k__Bacteria;p__Planctomycetes;c__Planctomycetia;o__Pirellulales;f__Pirellulaceae;g__;s__
OTU_3608	0.000175137	0.793803	4.97216e-05	4.97216e-05	0	0	4.97216e-05	0	4.97216e-05	0	0	0.000745823	0.00149165	0.000546937	0.000149165	0	4.97216e-05	9.94431e-05	0	4.97216e-05	0	0	4.97216e-05	0	4.97216e-05	0	k__Bacteria;p__Bacteroidetes;c__[Saprospirae];o__[Saprospirales];f__Saprospiraceae;g__Haliscomenobacter;s__
OTU_162	0.000165473	0.795369	0.000198886	9.94431e-05	0.000198886	0.000397772	0.000149165	0.000198886	9.94431e-05	0.000198886	0.000198886	0.000198886	0.000149165	0.000248608	0.000149165	0.000149165	0.000149165	0.00129276	0.00482299	0.00313246	9.94431e-05	0.000149165	0.000248608	4.97216e-05	0.000149165	9.94431e-05	k__Bacteria;p__Gemmatimonadetes;c__Gemm-1;o__;f__;g__;s__
OTU_849	0.000159104	0.796445	0.00228719	0.00233691	0.000894988	0.000149165	0.000248608	4.97216e-05	0.000348051	0.000198886	0.000248608	0.000546937	0.00094471	0.000298329	0.000198886	0.000198886	0.000149165	9.94431e-05	0.000149165	0.000298329	0.000497216	0.000546937	0.000298329	9.94431e-05	0.000298329	9.94431e-05	k__Bacteria;p__Proteobacteria;c__Betaproteobacteria;o__Burkholderiales
OTU_575	0.000158656	0.796522	9.94431e-05	0	4.97216e-05	0	4.97216e-05	0	4.97216e-05	0	9.94431e-05	0	0	9.94431e-05	0.000248608	0.000149165	0	0.00094471	0.0011436	0.000298329	0	0	0	0	0	9.94431e-05	k__Bacteria;p__[Thermi];c__Deinococci;o__Deinococcales;f__Deinococcaceae
OTU_169	0.000154586	0.79723	0.000298329	0.000198886	0.000596659	0.000198886	4.97216e-05	0.000198886	0.000348051	0.000149165	0.000348051	9.94431e-05	0.000248608	0	9.94431e-05	0.000149165	0.000198886	0.000348051	9.94431e-05	0.000149165	0.00268496	0.003928	0.00119332	0.000149165	4.97216e-05	9.94431e-05	k__Bacteria;p__Cyanobacteria;c__Oscillatoriophycideae;o__Chroococcales;f__Gomphosphaeriaceae;g__;s__
OTU_1640	0.000153576	0.797408	4.97216e-05	0	0	9.94431e-05	0.000149165	0.000198886	4.97216e-05	4.97216e-05	4.97216e-05	0.00144193	0.000894988	0.000546937	0	4.97216e-05	0	4.97216e-05	0.000546937	9.94431e-05	0	9.94431e-05	4.97216e-05	4.97216e-05	9.94431e-05	4.97216e-05	k__Bacteria;p__Proteobacteria;c__Alphaproteobacteria;o__Rhizobiales;f__Methylocystaceae;g__Pleomorphomonas;s__
OTU_588	0.000127854	0.802325	9.94431e-05	4.97216e-05	4.97216e-05	9.94431e-05	0.000198886	4.97216e-05	4.97216e-05	9.94431e-05	4.97216e-05	9.94431e-05	9.94431e-05	9.94431e-05	4.97216e-05	0	0	0.000397772	0.00124304	0.000745823	0.000298329	0.000348051	0.000298329	4.97216e-05	9.94431e-05	0	k__Bacteria;p__Proteobacteria;c__Gammaproteobacteria
OTU_182	0.000119725	0.804055	0.000397772	0.000894988	0.000994431	0.0032319	0.00218775	0.00273469	0.000397772	0.000447494	0.000447494	0.00164081	0.00402745	0.00109387	0.000397772	0.000497216	0.000348051	0.000795545	0.000596659	0.00144193	0.000546937	0.000546937	0.000696102	0.000198886	0.000248608	0	k__Bacteria;p__Proteobacteria;c__Betaproteobacteria;o__Burkholderiales;f__Comamonadaceae
OTU_3	0.000119601	0.804082	0.0071599	0.015712	0.00546937	0.00387828	0.00318218	0.00328162	0.0226233	0.0601631	0.0303302	0.000894988	0.00422633	0.00308274	0.0306285	0.0645883	0.0601631	0.0112371	0.00268496	0.00263524	0.00258552	0.0106404	0.0036794	0.00462411	0.00372912	0.00616547	k__Bacteria;p__Cyanobacteria
OTU_70	0.000115416	0.805013	0.00353023	0.0050716	0.00223747	0.000596659	0.000447494	0.000298329	0.00094471	0.00154137	0.00188942	0.000745823	0.000397772	0.00064638	0.000894988	0.000845267	0.000795545	0.000497216	0.000497216	0.000546937	0.00144193	0.00124304	0.0018397	0.000248608	0.000248608	9.94431e-05	k__Bacteria;p__Proteobacteria;c__Gammaproteobacteria;o__Xanthomonadales;f__Sinobacteraceae;g__;s__
OTU_610	0.000109996	0.806263	4.97216e-05	0	0	9.94431e-05	0.000248608	0	0	4.97216e-05	0.000149165	0.000546937	0	4.97216e-05	0	9.94431e-05	4.97216e-05	0.00124304	0.00238663	0.000894988	4.97216e-05	4.97216e-05	4.97216e-05	9.94431e-05	9.94431e-05	0.000149165	k__Bacteria;p__Proteobacteria;c__Alphaproteobacteria;o__Rhizobiales
OTU_530	0.000109634	0.806348	0.000149165	4.97216e-05	9.94431e-05	0.000745823	0.000994431	0.00064638	0.000348051	4.97216e-05	0.000248608	0.0013922	0.000497216	0.00064638	0	4.97216e-05	0	0.000298329	0.000248608	0.000149165	0.000198886	9.94431e-05	4.97216e-05	9.94431e-05	9.94431e-05	0	k__Bacteria;p__Proteobacteria;c__Betaproteobacteria;o__SC-I-84;f__;g__;s__
OTU_285	0.00010762	0.806827	0	4.97216e-05	4.97216e-05	0.000596659	0.00134248	0.00203858	9.94431e-05	9.94431e-05	0.000149165	9.94431e-05	9.94431e-05	0.000298329	9.94431e-05	9.94431e-05	4.97216e-05	0.000149165	0.000348051	0.000248608	4.97216e-05	4.97216e-05	0.000149165	4.97216e-05	4.97216e-05	0	k__Bacteria;p__Proteobacteria;c__Alphaproteobacteria;o__Rhodospirillales;f__Rhodospirillaceae
OTU_268	0.000105596	0.807317	0.000198886	0.000149165	0.000149165	0.000745823	0.000596659	0.000497216	9.94431e-05	0.000198886	0.000149165	9.94431e-05	0	0.000397772	4.97216e-05	0	4.97216e-05	0.00134248	0.000447494	0.000994431	9.94431e-05	0	4.97216e-05	4.97216e-05	0	9.94431e-05	k__Bacteria;p__Proteobacteria;c__Gammaproteobacteria;o__Legionellales
OTU_559	0.000103226	0.8079	4.97216e-05	0.000248608	9.94431e-05	0.000546937	0.000795545	0.0013922	9.94431e-05	4.97216e-05	4.97216e-05	9.94431e-05	9.94431e-05	0.000198886	9.94431e-05	4.97216e-05	9.94431e-05	9.94431e-05	0.000198886	0.000298329	0	0	0	9.94431e-05	9.94431e-05	0	k__Bacteria;p__Acidobacteria;c__EC1113;o__;f__;g__;s__
OTU_274	9.71145e-05	0.809459	0.000149165	0.000248608	9.94431e-05	0.000994431	0.00119332	0.00154137	0.000248608	4.97216e-05	0.000198886	0.000198886	0.000248608	0.00109387	9.94431e-05	0.000149165	9.94431e-05	0.000298329	0.000348051	0.000994431	9.94431e-05	0.000198886	0.000198886	4.97216e-05	4.97216e-05	0	k__Bacteria;p__Bacteroidetes;c__[Saprospirae];o__[Saprospirales];f__Saprospiraceae;g__;s__
OTU_233	8.95435e-05	0.811511	0.000149165	0.000149165	4.97216e-05	0.000397772	0.000298329	0.000198886	9.94431e-05	9.94431e-05	0.000198886	0.000845267	0.00248608	0.00198886	0.000198886	0.000198886	0	0.000198886	0.000248608	0.000397772	0.000149165	4.97216e-05	9.94431e-05	9.94431e-05	0.000149165	0.000248608	k__Bacteria;p__Proteobacteria;c__Gammaproteobacteria;o__Xanthomonadales;f__Xanthomonadaceae;g__;s__
OTU_374	8.01191e-05	0.814284	4.97216e-05	0	0	0.000298329	0.000248608	0.000149165	0	0.000149165	0	9.94431e-05	0.000198886	0.000248608	4.97216e-05	9.94431e-05	4.97216e-05	0.000497216	0.000894988	0.00144193	4.97216e-05	4.97216e-05	0	9.94431e-05	9.94431e-05	0	k__Bacteria;p__Proteobacteria;c__Deltaproteobacteria;o__NB1-j;f__JTB38;g__;s__
OTU_139	7.76623e-05	0.815053	0.000497216	0.000745823	4.97216e-05	0.000348051	0.000198886	9.94431e-05	0.00094471	0.0013922	0.0013922	0.000198886	0.000198886	0.000298329	0.000845267	0.00129276	0.00094471	0.000397772	0.000298329	0.000397772	0.000745823	0.000596659	0.000845267	0.000198886	0.000198886	0	k__Bacteria;p__Bacteroidetes;c__Flavobacteriia;o__Flavobacteriales;f__Cryomorphaceae;g__;s__
OTU_3761	7.47966e-05	0.815976	0.00164081	0.00154137	0.00213803	0.0018397	0.00188942	0.00149165	0.00154137	0.00094471	0.00129276	0.00939737	0.00929793	0.00333134	0.000447494	0.000596659	0.000745823	0.00119332	0.00154137	0.0025358	0.00124304	0.000994431	0.00094471	9.94431e-05	0.000298329	0.000248608	k__Bacteria;p__Proteobacteria;c__Betaproteobacteria;o__Burkholderiales;f__Comamonadaceae
OTU_115	7.32692e-05	0.816481	0.000298329	0.000397772	0.000348051	0.000397772	0.000447494	0.000845267	0.000696102	0.000745823	0.000497216	0.000149165	0.000298329	0.000198886	0.00124304	0.000397772	0.000497216	0.000298329	0.000348051	0.000298329	0.000795545	0.000745823	0.000845267	0.0018397	0.00188942	0.00119332	k__Bacteria;p__Firmicutes;c__Bacilli;o__Lactobacillales;f__Carnobacteriaceae;g__Carnobacterium;s__
OTU_202	7.10949e-05	0.817215	0.000149165	0.000397772	0.000248608	9.94431e-05	0.000149165	0.000149165	0.00064638	0.000795545	0.000696102	0.000149165	0.000198886	0.000198886	0.00064638	0.00159109	0.0013922	0.000198886	0.000447494	0.000198886	0.000298329	4.97216e-05	0.000149165	4.97216e-05	4.97216e-05	4.97216e-05	k__Bacteria;p__Bacteroidetes;c__[Saprospirae];o__[Saprospirales];f__Chitinophagaceae;g__;s__
OTU_325	6.45703e-05	0.819539	0.000696102	0.00124304	0.00094471	0.000248608	0.000696102	0.000397772	0.000745823	0.000994431	0.00104415	0.000198886	0.000248608	0.000298329	0.000894988	0.00119332	0.0013922	0.000248608	0.000248608	0.000198886	0.00109387	0.00154137	0.00109387	0.000248608	0.000497216	0	k__Bacteria;p__Actinobacteria;c__Actinobacteria;o__Actinomycetales;f__;g__;s__
OTU_291	5.91571e-05	0.821626	4.97216e-05	4.97216e-05	0.000149165	4.97216e-05	0.000149165	0.000149165	9.94431e-05	0.000149165	9.94431e-05	0.000198886	0.000198886	0.000198886	0.000149165	9.94431e-05	0	0.00109387	0.00313246	0.00159109	9.94431e-05	4.97216e-05	0	4.97216e-05	4.97216e-05	0.000149165	k__Bacteria;p__Proteobacteria;c__Alphaproteobacteria;o__Rhizobiales
OTU_358	5.88713e-05	0.821741	0.000149165	0.000248608	0.00109387	0.000248608	0.000198886	0.000149165	4.97216e-05	9.94431e-05	0.000149165	0.000198886	0.000248608	0.000149165	0	0	4.97216e-05	0.000198886	0.000198886	0.000397772	0.00119332	0.00109387	0.00149165	4.97216e-05	0.000198886	9.94431e-05	k__Bacteria;p__Proteobacteria;c__Alphaproteobacteria;o__Rhodospirillales;f__Acetobacteraceae
OTU_221	5.64221e-05	0.822744	0.000198886	4.97216e-05	0.000248608	0.000149165	0.000348051	0.000198886	0.000248608	0.000198886	0.000348051	4.97216e-05	0.000198886	0.000149165	0.000546937	0.000248608	0.000397772	4.97216e-05	0.000298329	0.000149165	0.000546937	0.000348051	0.000298329	0.00104415	0.000894988	0.000745823	k__Bacteria;p__Firmicutes;c__Bacilli;o__Lactobacillales;f__Streptococcaceae;g__Streptococcus;s__agalactiae
OTU_249	5.63356e-05	0.82278	0.00328162	0.00104415	0.000348051	0.00258552	0.00417661	0.0032319	0.000894988	0.000795545	0.00124304	0.00144193	0.000745823	0.00109387	0.000248608	0.000348051	0.000348051	0.000696102	0.000596659	0.000994431	0.000497216	0.000447494	0.000497216	0.000198886	0.000348051	0.000248608	k__Bacteria;p__Proteobacteria;c__Gammaproteobacteria;o__Xanthomonadales;f__Sinobacteraceae;g__;s__
OTU_106	5.41736e-05	0.823698	0.00193914	0.00159109	0.000994431	0.00144193	0.00109387	0.000795545	0.00198886	0.00412689	0.00263524	0.000348051	0.000248608	0.00064638	0.00154137	0.00169053	0.00154137	0.000546937	0.000745823	0.000397772	0.000397772	0.000447494	0.000298329	0.000348051	0.000348051	0.000447494	k__Bacteria;p__Bacteroidetes;c__Cytophagia;o__Cytophagales;f__Cytophagaceae;g__;s__
OTU_181	5.0845e-05	0.825174	0.000198886	0.000348051	0	0.000348051	0.000298329	9.94431e-05	0.000894988	0.0011436	0.000894988	9.94431e-05	9.94431e-05	0.000248608	0.00094471	0.00104415	0.00198886	9.94431e-05	0.000298329	4.97216e-05	0.000149165	9.94431e-05	0.000248608	4.97216e-05	9.94431e-05	9.94431e-05	k__Bacteria;p__Bacteroidetes;c__Sphingobacteriia;o__Sphingobacteriales;f__;g__;s__
OTU_127	5.01906e-05	0.825474	0.00258552	0.00353023	0.00203858	0.000447494	0.000696102	0.000447494	0.00188942	0.00288385	0.00278441	0.000497216	0.000795545	0.00094471	0.00258552	0.00382856	0.00353023	0.00134248	0.00124304	0.00248608	0.00178998	0.00159109	0.00178998	0.000447494	0.00064638	0.000497216	k__Bacteria;p__Bacteroidetes;c__[Saprospirae];o__[Saprospirales];f__Chitinophagaceae;g__Sediminibacterium;s__
OTU_2022	4.70221e-05	0.826976	0.000248608	0.000348051	9.94431e-05	0.000397772	0.000298329	0.000397772	4.97216e-05	9.94431e-05	0.000198886	0.000497216	0.000348051	4.97216e-05	9.94431e-05	0.000149165	0.000198886	9.94431e-05	0	0.000198886	0.000149165	0.000149165	0.000149165	0.00144193	0.000845267	0.000894988	k__Bacteria;p__Proteobacteria;c__Betaproteobacteria;o__Burkholderiales;f__Oxalobacteraceae;g__;s__
OTU_289	4.70097e-05	0.826982	9.94431e-05	9.94431e-05	9.94431e-05	4.97216e-05	4.97216e-05	0	0	0	9.94431e-05	0.000198886	4.97216e-05	4.97216e-05	4.97216e-05	0	9.94431e-05	0.000149165	9.94431e-05	0.000248608	0.00223747	0.00104415	0.000994431	0	9.94431e-05	0.000149165	k__Bacteria;p__Fusobacteria;c__Fusobacteriia;o__Fusobacteriales;f__Fusobacteriaceae;g__u114;s__
OTU_177	4.6169e-05	0.827395	0.000546937	0.000348051	0.000497216	0.00064638	0.000795545	0.00109387	4.97216e-05	0.000248608	0.000149165	0.000447494	0.000596659	0.000546937	9.94431e-05	0.000149165	0.000149165	0.00119332	0.00348051	0.00243636	0.000248608	0.000149165	0.000149165	0.000198886	0.000298329	0.000149165	k__Bacteria;p__Proteobacteria;c__Alphaproteobacteria;o__Rhizobiales;f__Hyphomicrobiaceae;g__Hyphomicrobium;s__
OTU_532	4.61182e-05	0.82742	0.000198886	0.000149165	9.94431e-05	0.000298329	0.000248608	0.000149165	4.97216e-05	9.94431e-05	0	0.000596659	0.000845267	0.000348051	0.000248608	9.94431e-05	0	0.00109387	0.00238663	0.00109387	9.94431e-05	4.97216e-05	4.97216e-05	4.97216e-05	0	0.000149165	k__Bacteria;p__Proteobacteria;c__Gammaproteobacteria;o__Xanthomonadales;f__Xanthomonadaceae
OTU_158	3.9435e-05	0.83096	0.000348051	0.0011436	0.000397772	0.000248608	0.000397772	0.000248608	0.00094471	0.00159109	0.00169053	0.000248608	0.000248608	0.000298329	0.00144193	0.00278441	0.00208831	0.000198886	0.000198886	0.000149165	0.000198886	0.000348051	0.000596659	0.000348051	0.000149165	0.000149165	k__Bacteria;p__Actinobacteria;c__Actinobacteria;o__Actinomycetales;f__Microbacteriaceae;g__Candidatus Rhodoluna;s__
OTU_123	3.84673e-05	0.831515	0.000248608	0.000348051	0.000497216	0.00174025	0.00144193	0.00124304	0.000397772	0.000397772	0.000447494	0.00208831	0.00198886	0.00412689	0.000248608	0.000298329	0.000198886	0.000348051	0.000348051	0.000894988	0.000149165	0.000248608	0.000348051	0.000149165	0.000198886	0.000149165	k__Bacteria;p__Proteobacteria;c__Betaproteobacteria
OTU_272	3.80428e-05	0.831762	0.00104415	0.00064638	0.000546937	9.94431e-05	4.97216e-05	9.94431e-05	0.000248608	0.000397772	0.000298329	9.94431e-05	0.000149165	0.000198886	0.000298329	0.000397772	0.000298329	9.94431e-05	4.97216e-05	0.000149165	0.000149165	0.000248608	0.000198886	0	4.97216e-05	4.97216e-05	k__Bacteria;p__Proteobacteria
OTU_73	3.70068e-05	0.832375	0.00109387	0.00188942	0.00233691	0.000397772	0.000348051	0.000497216	0.0025358	0.00348051	0.00353023	0.000497216	0.000248608	0.000596659	0.00288385	0.00308274	0.000696102	0.000397772	0.000298329	0.000696102	0.000298329	0.000447494	0.000447494	0.000198886	0.000348051	0.000149165	k__Bacteria;p__Bacteroidetes;c__Flavobacteriia;o__Flavobacteriales;f__Cryomorphaceae;g__Fluviicola;s__
OTU_311	3.57749e-05	0.833123	9.94431e-05	0	9.94431e-05	0.000149165	9.94431e-05	0.000198886	4.97216e-05	0.000149165	4.97216e-05	9.94431e-05	4.97216e-05	9.94431e-05	0	0	9.94431e-05	0	0	4.97216e-05	4.97216e-05	4.97216e-05	9.94431e-05	0.000546937	0.0013922	0.0011436	k__Bacteria;p__Armatimonadetes;c__[Fimbriimonadia];o__[Fimbriimonadales];f__[Fimbriimonadaceae];g__Fimbriimonas;s__
OTU_75	3.52275e-05	0.833463	0.00144193	0.000497216	0.00338107	0.000894988	0.00064638	0.00169053	0.000596659	0.000745823	0.00064638	0.000149165	0.000397772	0.000348051	0.000546937	0.00064638	0.000696102	0.00174025	0.000745823	0.000447494	0.0109387	0.00780628	0.00457438	0.000447494	0.000447494	0.00064638	k__Bacteria;p__Cyanobacteria;c__Oscillatoriophycideae;o__Chroococcales;f__Microcystaceae;g__Microcystis;s__
OTU_732	3.48421e-05	0.833705	0.000198886	0	0.000149165	9.94431e-05	4.97216e-05	4.97216e-05	0.000198886	4.97216e-05	4.97216e-05	0.000894988	0.000497216	0.00124304	0	9.94431e-05	0.000149165	0.000298329	0.000198886	9.94431e-05	4.97216e-05	0	4.97216e-05	0	4.97216e-05	0	k__Bacteria;p__Proteobacteria;c__Gammaproteobacteria;o__Chromatiales
OTU_348	3.47471e-05	0.833765	4.97216e-05	9.94431e-05	9.94431e-05	9.94431e-05	4.97216e-05	9.94431e-05	4.97216e-05	0.000149165	0.000149165	4.97216e-05	9.94431e-05	0	4.97216e-05	0.000149165	0	0.000149165	0.000149165	9.94431e-05	4.97216e-05	0	0	0.000994431	0.000845267	0.00188942	k__Bacteria;p__Verrucomicrobia;c__Verrucomicrobiae;o__Verrucomicrobiales;f__Verrucomicrobiaceae;g__;s__
OTU_810	3.30524e-05	0.834859	0	9.94431e-05	0	4.97216e-05	4.97216e-05	0.000248608	4.97216e-05	0	4.97216e-05	9.94431e-05	9.94431e-05	9.94431e-05	0	0.000198886	0	0.00119332	0.000845267	0.000497216	4.97216e-05	0.000149165	0	0	4.97216e-05	0.000149165	k__Bacteria;p__Planctomycetes;c__Planctomycetia;o__Gemmatales;f__Gemmataceae;g__Gemmata;s__
OTU_198	3.11794e-05	0.836126	0.000397772	0.000397772	0.000248608	0.000248608	0.000198886	0.000198886	0.000894988	0.00149165	0.00134248	0.000149165	9.94431e-05	0.000149165	0.00064638	0.00164081	0.00104415	0.000248608	0.000497216	0.000546937	0.0011436	0.000994431	0.00164081	4.97216e-05	0.000149165	4.97216e-05	k__Bacteria;p__Bacteroidetes;c__Sphingobacteriia;o__Sphingobacteriales;f__;g__;s__
OTU_398	2.95647e-05	0.837272	9.94431e-05	0	0	4.97216e-05	0.000248608	9.94431e-05	9.94431e-05	0	9.94431e-05	9.94431e-05	9.94431e-05	4.97216e-05	0	4.97216e-05	4.97216e-05	0.000546937	0.00129276	0.0013922	4.97216e-05	0	9.94431e-05	4.97216e-05	4.97216e-05	0.000149165	k__Bacteria;p__Proteobacteria;c__Deltaproteobacteria;o__Myxococcales;f__;g__;s__
OTU_307	2.87308e-05	0.837886	9.94431e-05	4.97216e-05	4.97216e-05	4.97216e-05	0.000149165	0.000149165	0.000795545	0.000397772	0.0011436	0	0	9.94431e-05	0.000447494	0.000497216	0.000596659	0.000149165	0.000198886	0.000149165	0	9.94431e-05	4.97216e-05	4.97216e-05	0.000149165	0	k__Bacteria;p__Proteobacteria;c__Deltaproteobacteria;o__Myxococcales;f__OM27;g__;s__
OTU_93	2.78852e-05	0.838523	0.000447494	0.000447494	0.00064638	0.00109387	0.00134248	0.000596659	0.00208831	0.0032319	0.00228719	0.0011436	0.0018397	0.000845267	0.00154137	0.00188942	0.00263524	0.000397772	0.00094471	0.000795545	0.000298329	0.000348051	0.000397772	0.000248608	0.000397772	0.000546937	k__Bacteria;p__Proteobacteria;c__Gammaproteobacteria;o__Methylococcales;f__Methylococcaceae
OTU_743	2.76594e-05	0.838696	0.000447494	0.000696102	0.000198886	0.00218775	0.00174025	0.00104415	0.00188942	0.00129276	0.0018397	0.000894988	0.00144193	0.000696102	0.00094471	0.000397772	0.00064638	0.000248608	0.000298329	0.000447494	0.000397772	0.000348051	0.000348051	4.97216e-05	9.94431e-05	0.000198886	k__Bacteria;p__Proteobacteria;c__Betaproteobacteria;o__Rhodocyclales;f__Rhodocyclaceae;g__Sulfuritalea;s__
OTU_426	2.6901e-05	0.839286	9.94431e-05	0.000198886	0.000348051	0.000149165	0.000149165	0.000198886	0.000348051	0.000248608	0.000149165	0.00218775	0.00268496	0.000894988	9.94431e-05	0	0.000248608	0.000845267	0.0011436	0.000845267	0.000198886	0.000198886	0.000248608	9.94431e-05	0.000149165	0.000149165	k__Bacteria;p__Proteobacteria;c__Betaproteobacteria;o__Methylophilales;f__Methylophilaceae
OTU_4947	2.64859e-05	0.839616	0	9.94431e-05	0	4.97216e-05	0.000298329	0.000348051	4.97216e-05	4.97216e-05	9.94431e-05	0.00198886	0.0011436	0.00094471	0	9.94431e-05	9.94431e-05	0.000298329	0.000149165	0.000298329	9.94431e-05	4.97216e-05	4.97216e-05	4.97216e-05	0.000149165	0.000248608	k__Bacteria;p__Proteobacteria;c__Alphaproteobacteria;o__Rhizobiales;f__;g__;s__
OTU_90	2.64338e-05	0.839657	0.000348051	0.000397772	0.000198886	0.000298329	0.000348051	0.000348051	0.000198886	0.000596659	0.000447494	0.000546937	0.000447494	0.000447494	0.000248608	0.000149165	0.000248608	0.00432578	0.00885044	0.00372912	0.000149165	0.000149165	4.97216e-05	0.000348051	0.000198886	9.94431e-05	k__Bacteria;p__Proteobacteria;c__Alphaproteobacteria;o__;f__;g__;s__
OTU_609	2.58132e-05	0.840158	0	9.94431e-05	0	4.97216e-05	4.97216e-05	0	0	0	0	0	4.97216e-05	4.97216e-05	0	0.000198886	9.94431e-05	0.000397772	0.00104415	0.00064638	4.97216e-05	0	0.000248608	0	0	0	k__Bacteria;p__Spirochaetes;c__[Leptospirae];o__[Leptospirales];f__Leptospiraceae;g__Leptonema;s__
OTU_456	2.5645e-05	0.840296	0.000149165	0.000397772	9.94431e-05	0.000298329	0.000497216	0.000298329	0.000198886	0.000298329	0	0.0011436	0.000447494	0.000546937	0.000149165	9.94431e-05	4.97216e-05	0.000845267	0.0011436	0.00109387	9.94431e-05	9.94431e-05	4.97216e-05	0.000198886	0.000149165	9.94431e-05	k__Bacteria;p__Proteobacteria;c__Alphaproteobacteria;o__Caulobacterales;f__Caulobacteraceae;g__Phenylobacterium;s__
OTU_129	2.53545e-05	0.840536	0.000348051	0.000248608	0.000198886	0.000298329	0.000298329	0.000795545	0.000149165	0.000198886	0.000248608	0.000298329	0.000149165	0.000298329	0.000149165	0.000149165	0.000198886	0.00188942	0.00492243	0.00288385	0.000497216	0.000596659	0.00064638	0.000348051	0.000198886	0.000248608	k__Bacteria;p__Proteobacteria;c__Alphaproteobacteria
OTU_895	2.28833e-05	0.842675	0.00159109	0.000497216	0.000397772	0.00178998	0.00119332	0.000994431	0.000596659	0.000397772	0.000795545	0.00213803	0.0018397	0.00303302	9.94431e-05	9.94431e-05	0.000397772	0.000397772	9.94431e-05	0.000397772	0.000248608	0.000198886	0.000198886	4.97216e-05	4.97216e-05	9.94431e-05	k__Bacteria;p__Proteobacteria;c__Betaproteobacteria;o__Burkholderiales;f__Comamonadaceae
OTU_72	2.23457e-05	0.843167	0.000845267	0.000795545	0.000596659	0.000298329	0.000546937	0.000298329	0.00218775	0.00193914	0.00353023	0.00094471	0.000397772	0.000696102	0.00238663	0.00536993	0.003928	0.000298329	0.000348051	0.000298329	0.00064638	0.00064638	0.0011436	0.000397772	0.000348051	0.000198886	k__Bacteria;p__Actinobacteria;c__Actinobacteria;o__Actinomycetales;f__Microbacteriaceae;g__;s__
OTU_142	2.1331e-05	0.844123	0.0011436	0.000994431	0.000845267	0.000497216	0.000397772	0.000348051	0.000696102	0.000795545	0.000596659	0.000149165	0.00064638	0.000546937	0.000845267	0.00119332	0.00134248	0.0013922	0.000348051	0.000397772	0.000497216	0.000845267	0.000596659	0.00382856	0.00934765	0.00934765	k__Bacteria;p__Cyanobacteria;c__Chloroplast;o__Streptophyta;f__;g__;s__
OTU_228	2.04784e-05	0.844958	0.000248608	0.000497216	4.97216e-05	0.000149165	0.000149165	9.94431e-05	0.000795545	0.000497216	0.000497216	9.94431e-05	0.000198886	0.000198886	0.000845267	0.00149165	0.00119332	4.97216e-05	0.000298329	4.97216e-05	0	9.94431e-05	0.000149165	0.000149165	0.000149165	0	k__Bacteria;p__Chloroflexi;c__SL56;o__;f__;g__;s__
OTU_408	2.02039e-05	0.845233	4.97216e-05	4.97216e-05	9.94431e-05	9.94431e-05	0.000248608	0.000149165	0	0	9.94431e-05	0.000149165	0.000198886	0	9.94431e-05	4.97216e-05	0	0.000894988	0.000546937	0.00119332	9.94431e-05	0	9.94431e-05	0	4.97216e-05	9.94431e-05	k__Bacteria;p__Proteobacteria;c__Alphaproteobacteria;o__Rhodospirillales;f__Rhodospirillaceae;g__;s__
OTU_43	2.01193e-05	0.845318	0.00348051	0.00551909	0.00238663	0.00467383	0.00432578	0.00362967	0.0132259	0.00666269	0.00964598	0.0163087	0.0180489	0.00865155	0.00402745	0.00427605	0.00442522	0.00203858	0.00566826	0.00427605	0.00223747	0.00169053	0.00233691	0.000795545	0.00104415	0.00064638	k__Bacteria;p__Proteobacteria;c__Betaproteobacteria;o__Burkholderiales;f__Comamonadaceae
OTU_179	2.00274e-05	0.845411	0.000198886	0.000198886	9.94431e-05	0.000248608	0.000248608	0.000248608	0	0.000298329	0.000198886	0.000596659	0.000348051	0.000198886	0.000198886	9.94431e-05	0.000248608	0.0013922	0.00377884	0.0025358	0.000149165	0	0.000198886	0.000198886	9.94431e-05	0.000149165	k__Bacteria;p__Proteobacteria
OTU_161	1.90953e-05	0.846377	0.00064638	0.000546937	0.000248608	9.94431e-05	0.000149165	0.000397772	0.000845267	0.00119332	0.00159109	4.97216e-05	0.000248608	0.000198886	0.000994431	0.00129276	0.00129276	0.000298329	0.000298329	0.000298329	0.000397772	0.000696102	0.000696102	0.000198886	0.000248608	0.000248608	k__Bacteria;p__Bacteroidetes;c__Sphingobacteriia;o__Sphingobacteriales;f__;g__;s__
OTU_347	1.80949e-05	0.84746	0.000845267	0.000845267	0.00064638	0.000447494	0.000447494	0.000447494	0.00104415	0.00149165	0.0018397	9.94431e-05	0.000497216	0.000348051	0.0011436	0.00134248	0.00178998	0.000298329	0.000348051	0.000745823	0.000248608	0.000447494	0.000447494	9.94431e-05	4.97216e-05	0.000198886	k__Bacteria;p__Bacteroidetes;c__[Saprospirae];o__[Saprospirales];f__Chitinophagaceae;g__;s__
OTU_140	1.80792e-05	0.847477	0.00144193	0.00174025	0.00094471	0.00064638	0.000596659	0.000348051	0.00064638	0.00064638	0.00109387	0.000745823	0.000845267	0.00094471	0.000198886	0.000497216	0.000397772	0.000795545	0.00288385	0.00203858	0.00432578	0.00273469	0.0036794	0.000248608	0.000198886	0.000248608	k__Bacteria;p__Proteobacteria;c__Betaproteobacteria;o__Burkholderiales
OTU_16	1.595e-05	0.849967	0.00427605	0.0155628	0.0185461	0.00248608	0.00273469	0.00228719	0.00362967	0.00268496	0.00278441	0.00412689	0.00422633	0.00447494	0.00203858	0.00318218	0.00268496	0.0013922	0.00248608	0.0025358	0.0227228	0.014469	0.0196897	0.000894988	0.00104415	0.000994431	k__Bacteria;p__Proteobacteria;c__Betaproteobacteria;o__Burkholderiales;f__Comamonadaceae
OTU_342	1.57182e-05	0.850255	9.94431e-05	0.000298329	0	9.94431e-05	0.000198886	4.97216e-05	0.00064638	0.00159109	0.00104415	9.94431e-05	9.94431e-05	4.97216e-05	0.00094471	0.00124304	0.0013922	0.000298329	0.000298329	0.000248608	9.94431e-05	0.000149165	4.97216e-05	0.000149165	4.97216e-05	4.97216e-05	k__Bacteria;p__Proteobacteria;c__Deltaproteobacteria;o__Myxococcales;f__Polyangiaceae
OTU_628	1.56265e-05	0.85037	4.97216e-05	4.97216e-05	0	0.000198886	0.000497216	0.000248608	4.97216e-05	9.94431e-05	4.97216e-05	0.000845267	0.00104415	0.00064638	9.94431e-05	4.97216e-05	9.94431e-05	0.000795545	0.000894988	0.000348051	9.94431e-05	9.94431e-05	9.94431e-05	9.94431e-05	0.000149165	4.97216e-05	k__Bacteria;p__Armatimonadetes;c__Armatimonadia;o__Armatimonadales;f__Armatimonadaceae;g__;s__
OTU_881	1.46882e-05	0.851581	0.000149165	0.000248608	0	0.00149165	0.00193914	0.00174025	9.94431e-05	0.000149165	4.97216e-05	0.000198886	0.000348051	0.00124304	0.000149165	0.000198886	9.94431e-05	0.00094471	0.00193914	0.000497216	0.000198886	0.000248608	4.97216e-05	4.97216e-05	4.97216e-05	0.000198886	k__Bacteria;p__Proteobacteria;c__Deltaproteobacteria;o__Myxococcales;f__Polyangiaceae;g__;s__
OTU_391	1.42741e-05	0.852137	9.94431e-05	9.94431e-05	0	9.94431e-05	9.94431e-05	0.000248608	9.94431e-05	4.97216e-05	9.94431e-05	0.000198886	9.94431e-05	0.000198886	9.94431e-05	0	0	0.000894988	0.00134248	0.000497216	4.97216e-05	0	9.94431e-05	4.97216e-05	0	0	k__Bacteria;p__Proteobacteria;c__Gammaproteobacteria
OTU_282	1.14814e-05	0.856297	9.94431e-05	0	9.94431e-05	0.000696102	0.00144193	0.000795545	9.94431e-05	0.000248608	0.000198886	0.000348051	9.94431e-05	0.000397772	4.97216e-05	9.94431e-05	0.000149165	0.000248608	0.000198886	0.000248608	0.000248608	4.97216e-05	9.94431e-05	9.94431e-05	4.97216e-05	0	k__Bacteria;p__Proteobacteria;c__Alphaproteobacteria;o__Rhodospirillales;f__Rhodospirillaceae;g__;s__
OTU_305	1.04684e-05	0.858024	9.94431e-05	0.000248608	0.000198886	0.00144193	0.00154137	0.000894988	0.000149165	4.97216e-05	0.000447494	9.94431e-05	0.000198886	0.000198886	0.000198886	0.000198886	0.000149165	0.000894988	0.000447494	0.0013922	4.97216e-05	0.000149165	9.94431e-05	9.94431e-05	4.97216e-05	0	k__Bacteria;p__Bacteroidetes;c__Cytophagia;o__Cytophagales;f__Cytophagaceae;g__;s__
OTU_477	1.04523e-05	0.858053	0.000298329	0.000198886	0.000149165	0.000596659	0.000745823	0.00094471	0	0.000198886	9.94431e-05	0.000596659	0.00134248	0.00134248	9.94431e-05	0.000248608	0.000149165	0.000198886	0.000198886	0.00064638	4.97216e-05	4.97216e-05	4.97216e-05	4.97216e-05	4.97216e-05	9.94431e-05	k__Bacteria;p__Bacteroidetes;c__[Saprospirae];o__[Saprospirales];f__Chitinophagaceae;g__;s__
OTU_212	9.33269e-06	0.860142	0.000298329	0.000298329	0.000198886	0.000198886	0.000298329	0.000149165	0.00064638	0.000397772	0.000894988	0.000198886	0.000149165	0.000298329	0.000795545	0.0013922	0.00109387	0.000198886	0.000198886	0.000149165	0.000298329	0.000198886	0.000248608	0	0	4.97216e-05	k__Bacteria;p__Planctomycetes;c__Planctomycetia;o__Gemmatales;f__Gemmataceae;g__;s__
OTU_1501	8.72495e-06	0.861368	0.00616547	0.00357995	0.00263524	0.000845267	0.000596659	0.00094471	0.00651352	0.0089996	0.0069113	0.000397772	0.00144193	0.000546937	0.0132757	0.0275955	0.0285402	0.00178998	0.000845267	0.000696102	0.00218775	0.00870127	0.00288385	0.000845267	0.00124304	0.00119332	k__Bacteria;p__Cyanobacteria;c__Chloroplast;o__Cryptophyta;f__;g__;s__
OTU_105	8.40547e-06	0.862042	0.000447494	0.000248608	0.000397772	0.000596659	0.000248608	0.000198886	0.000348051	0.000546937	0.000447494	0.000745823	0.00218775	0.000745823	0.000298329	0.000397772	0.000248608	0.00268496	0.00631464	0.00462411	0.000397772	0.000397772	0.000447494	0.000298329	0.000248608	0.000149165	k__Bacteria;p__Bacteroidetes;c__[Saprospirae];o__[Saprospirales];f__Saprospiraceae;g__Haliscomenobacter;s__
OTU_330	8.30536e-06	0.862258	9.94431e-05	9.94431e-05	9.94431e-05	0.000546937	0.000845267	0.000596659	9.94431e-05	0.000149165	9.94431e-05	0.000497216	0.00064638	0.00119332	0.000198886	0.000149165	4.97216e-05	0.000795545	0.00129276	0.000894988	9.94431e-05	0.000149165	0.000149165	0.000248608	0.000149165	0.000149165	k__Bacteria;p__Proteobacteria;c__Deltaproteobacteria;o__Myxococcales;f__Nannocystaceae;g__Plesiocystis;s__
OTU_34	8.11215e-06	0.862681	0.00159109	0.00362967	0.000894988	0.000596659	0.000447494	0.000795545	0.00243636	0.00417661	0.0036794	0.000596659	0.000596659	0.000894988	0.00263524	0.00472355	0.00422633	0.000497216	0.000994431	0.000745823	0.0069113	0.00447494	0.00636436	0.000447494	0.000348051	0.000546937	k__Bacteria;p__Actinobacteria;c__Actinobacteria;o__Actinomycetales
OTU_5103	8.09376e-06	0.862722	4.97216e-05	0.000348051	9.94431e-05	0.000795545	0.000596659	0.000596659	0.000198886	0.000248608	0.000149165	0.0011436	0.000397772	0.000497216	0.000149165	4.97216e-05	9.94431e-05	0.00104415	0.00203858	0.00144193	0.000149165	0.000298329	0.000198886	0.000149165	0.000149165	0.000198886	k__Bacteria;p__Proteobacteria;c__Alphaproteobacteria;o__Rhizobiales
OTU_83	7.98738e-06	0.862959	0.000198886	0.000348051	0.000397772	0.000447494	0.000298329	0.000497216	0.000298329	0.000248608	0.000248608	0.000198886	0.000298329	0.000198886	0.000447494	0.000248608	0.000298329	0.00298329	0.00795545	0.00546937	0.000298329	0.000298329	0.000497216	9.94431e-05	9.94431e-05	0.000198886	k__Bacteria;p__Cyanobacteria;c__4C0d-2;o__SM2F09;f__;g__;s__
OTU_138	7.90579e-06	0.863142	0.00094471	0.000397772	4.97216e-05	0.00387828	0.00263524	0.00193914	0.000795545	0.000696102	0.0011436	0.000348051	0.000298329	0.000546937	0.000198886	0.000298329	0.000198886	0.000546937	0.000696102	0.000745823	0.000298329	0.000149165	0.000149165	0.000248608	0.000248608	0.000248608	k__Bacteria;p__Proteobacteria;c__Deltaproteobacteria;o__MBNT15;f__;g__;s__
OTU_200	7.65057e-06	0.863728	0.000198886	0.000198886	9.94431e-05	0.000397772	0.000298329	0.000397772	9.94431e-05	0.000149165	0.000348051	0.000546937	0.000298329	0.000198886	4.97216e-05	4.97216e-05	0.000198886	0.00238663	0.00571798	0.00318218	9.94431e-05	9.94431e-05	9.94431e-05	0.000149165	0.000149165	0.000248608	k__Bacteria;p__Proteobacteria;c__Alphaproteobacteria;o__Rhizobiales;f__Hyphomicrobiaceae;g__Hyphomicrobium;s__
OTU_507	7.20903e-06	0.864781	0.00512132	0.0057677	0.00353023	0.00288385	0.00258552	0.00218775	0.00909905	0.00696102	0.00835322	0.0103918	0.00840294	0.00522076	0.00353023	0.00427605	0.00477327	0.00248608	0.00188942	0.00462411	0.00164081	0.00124304	0.00154137	0.000696102	0.00094471	0.00064638	k__Bacteria;p__Proteobacteria;c__Betaproteobacteria;o__Burkholderiales;f__Comamonadaceae
OTU_1966	6.85418e-06	0.865669	0.00134248	0.00104415	0.00149165	0.000298329	0.000248608	0.000298329	0.00064638	0.000546937	0.000397772	0.000298329	0.000248608	0.000447494	0.000149165	0.000298329	0.00064638	9.94431e-05	0.000149165	4.97216e-05	0.00178998	0.000894988	0.000994431	0.000198886	0.000149165	0	k__Bacteria;p__Proteobacteria;c__Betaproteobacteria
OTU_44	6.07828e-06	0.867758	0.000348051	0.000845267	0.000497216	0.000795545	0.00159109	0.00159109	0.00154137	0.00169053	0.000894988	0.000497216	0.000497216	0.000348051	0.00288385	0.000497216	0.00124304	0.000397772	0.000845267	0.000546937	0.00213803	0.00228719	0.00243636	0.00467383	0.00442522	0.00372912	k__Bacteria;p__Firmicutes;c__Bacilli;o__Bacillales;f__Listeriaceae;g__Brochothrix;s__
OTU_501	6.0316e-06	0.867891	4.97216e-05	9.94431e-05	4.97216e-05	4.97216e-05	4.97216e-05	4.97216e-05	0	9.94431e-05	4.97216e-05	0	0	0	0	9.94431e-05	0	0.00104415	0.000894988	0.000397772	9.94431e-05	0	4.97216e-05	0	0	4.97216e-05	k__Bacteria;p__[Thermi];c__Deinococci;o__Thermales;f__Thermaceae;g__Meiothermus;s__
OTU_189	6.01958e-06	0.867926	0.000696102	0.000596659	0.000248608	0.00402745	0.00313246	0.00193914	0.00104415	0.000497216	0.000894988	0.00169053	0.00159109	0.00159109	0.000198886	0.000198886	0.000546937	0.00119332	0.00104415	0.00149165	0.000447494	0.000149165	0.000497216	0.000497216	0.000397772	0.000397772	k__Bacteria;p__Proteobacteria;c__Gammaproteobacteria;o__Alteromonadales;f__125ds10;g__;s__
OTU_446	5.9307e-06	0.868182	9.94431e-05	0.000198886	9.94431e-05	9.94431e-05	0	4.97216e-05	4.97216e-05	4.97216e-05	0	0.00144193	0.000696102	0.000696102	0	4.97216e-05	4.97216e-05	9.94431e-05	4.97216e-05	9.94431e-05	4.97216e-05	0	4.97216e-05	0	0	0	k__Bacteria;p__Proteobacteria;c__Gammaproteobacteria;o__Xanthomonadales;f__Xanthomonadaceae;g__;s__
OTU_152	5.74916e-06	0.868715	0.000745823	0.00094471	0.000397772	0.0025358	0.00263524	0.00178998	0.00064638	0.00094471	0.000546937	0.00343079	0.0018397	0.00188942	0.00064638	0.00064638	0.000795545	0.00263524	0.00472355	0.00298329	0.000348051	0.000248608	0.000248608	0.00343079	0.00263524	0.00228719	k__Bacteria;p__Proteobacteria;c__Alphaproteobacteria;o__Rhizobiales;f__Hyphomicrobiaceae;g__Hyphomicrobium;s__
OTU_1115	5.71932e-06	0.868804	0.00268496	0.00318218	0.00308274	0.00268496	0.00313246	0.00298329	0.0133254	0.0100438	0.0143695	0.0152148	0.015364	0.00686158	0.00750796	0.0105907	0.00939737	0.0018397	0.00283413	0.00353023	0.00258552	0.00178998	0.00223747	0.00193914	0.00462411	0.00273469	k__Bacteria;p__Proteobacteria;c__Betaproteobacteria;o__Burkholderiales;f__Comamonadaceae
OTU_293	5.70297e-06	0.868853	0.000447494	0.000298329	0.000149165	0.00308274	0.00198886	0.00174025	0.000596659	0.000348051	0.000546937	0.000596659	0.00119332	0.0013922	0.000248608	0.000397772	0.000198886	0.000696102	0.000546937	0.000397772	0.000248608	0.000397772	0.000248608	0.000198886	0.000348051	9.94431e-05	k__Bacteria;p__Acidobacteria;c__Acidobacteria-6;o__iii1-15;f__;g__;s__
OTU_102	5.21967e-06	0.870358	0.000348051	0.000397772	0.000298329	0.000248608	0.000397772	0.000447494	0.000298329	0.000248608	0.000447494	0.000795545	0.000745823	0.00094471	0.000198886	0.000348051	0.000198886	0.00298329	0.00527049	0.0071599	0.000248608	0.000546937	0.000248608	9.94431e-05	0	9.94431e-05	k__Bacteria;p__Proteobacteria;c__Betaproteobacteria
OTU_117	5.14251e-06	0.870609	0.00208831	0.0011436	0.00124304	0.000696102	0.000596659	0.000497216	0.000795545	0.00064638	0.000397772	0.000397772	0.000596659	0.000745823	0.000149165	0.000298329	0.000397772	0.000497216	0.000745823	0.00064638	0.00233691	0.00159109	0.00193914	9.94431e-05	9.94431e-05	0.000198886	k__Bacteria;p__Proteobacteria;c__Betaproteobacteria
OTU_292	4.6055e-06	0.872454	0.000149165	4.97216e-05	0.000149165	0.000198886	0.000198886	4.97216e-05	9.94431e-05	9.94431e-05	0.000149165	0.000198886	4.97216e-05	0.000248608	9.94431e-05	9.94431e-05	4.97216e-05	0.000248608	0.000298329	9.94431e-05	0	0	4.97216e-05	0.000845267	0.00154137	0.000994431	k__Bacteria;p__Proteobacteria;c__Alphaproteobacteria;o__Rhizobiales;f__Hyphomicrobiaceae;g__Hyphomicrobium;s__
OTU_157	4.46999e-06	0.872949	0.00233691	0.00427605	0.00149165	0.00422633	0.003928	0.00328162	0.0032319	0.00159109	0.0025358	0.00815434	0.00934765	0.00497216	0.00109387	0.00104415	0.00109387	0.00144193	0.00223747	0.00298329	0.00109387	0.0011436	0.0011436	0.000397772	0.000596659	0.000397772	k__Bacteria;p__Proteobacteria;c__Betaproteobacteria;o__Burkholderiales;f__Comamonadaceae
OTU_281	4.22865e-06	0.873864	0.000198886	9.94431e-05	9.94431e-05	4.97216e-05	4.97216e-05	4.97216e-05	0.000248608	0.000397772	0.000546937	4.97216e-05	4.97216e-05	0.000198886	0.000149165	0.000149165	0.000198886	0.000248608	9.94431e-05	0.000198886	0.000745823	0.00109387	0.0013922	0.000149165	0	4.97216e-05	k__Bacteria;p__Bacteroidetes
OTU_497	4.05644e-06	0.874544	4.97216e-05	0.000149165	0	4.97216e-05	9.94431e-05	0	9.94431e-05	4.97216e-05	9.94431e-05	0	0	9.94431e-05	0	0	4.97216e-05	0.00119332	0.00064638	0.000745823	0	0	0	4.97216e-05	0	0	k__Bacteria;p__Chloroflexi;c__Anaerolineae;o__SBR1031;f__A4b;g__;s__
OTU_470	3.65713e-06	0.876223	0.000397772	0.00104415	0.00109387	0.000248608	0.000248608	0.000248608	0.000397772	0.000497216	0.000546937	9.94431e-05	9.94431e-05	9.94431e-05	0.00109387	0.00119332	0.000994431	0	0.000149165	0.000149165	0.000248608	0.000348051	0.000348051	0.000298329	0.000497216	0.000248608	k__Bacteria;p__Firmicutes;c__Bacilli;o__Bacillales
OTU_420	3.50293e-06	0.876915	9.94431e-05	0.000149165	0.000248608	0.000795545	0.0011436	0.00109387	4.97216e-05	4.97216e-05	0.000149165	0.000298329	0.000546937	0.000447494	0.000149165	0.000149165	0.000198886	0.00104415	0.00094471	0.00188942	9.94431e-05	0.000149165	0.000198886	4.97216e-05	9.94431e-05	0	k__Bacteria;p__Proteobacteria;c__Betaproteobacteria;o__;f__;g__;s__
OTU_493	3.42673e-06	0.877266	0.000149165	0.000248608	9.94431e-05	9.94431e-05	9.94431e-05	9.94431e-05	0.000149165	4.97216e-05	4.97216e-05	4.97216e-05	0.000248608	0.000298329	4.97216e-05	9.94431e-05	0	9.94431e-05	9.94431e-05	9.94431e-05	0.00064638	0.000845267	0.00104415	0.000198886	4.97216e-05	9.94431e-05	k__Bacteria;p__Verrucomicrobia;c__[Pedosphaerae];o__[Pedosphaerales];f__R4-41B;g__;s__
OTU_207	3.37845e-06	0.877492	0.000149165	0.000447494	0.000198886	0.000795545	0.00104415	0.00094471	0.00064638	0.00064638	0.000397772	0.000198886	9.94431e-05	9.94431e-05	0.000696102	0.000447494	0.000497216	4.97216e-05	0.000248608	0.000198886	0.00094471	0.000348051	0.00064638	0.00119332	0.00178998	0.00119332	k__Bacteria;p__Firmicutes;c__Bacilli;o__Bacillales
OTU_252	3.1826e-06	0.878439	0.000198886	9.94431e-05	0	0.00109387	0.00174025	0.00263524	9.94431e-05	9.94431e-05	0	0.000198886	9.94431e-05	0.000298329	0	0.000149165	9.94431e-05	9.94431e-05	0	0.000149165	0	4.97216e-05	0	0	9.94431e-05	0	k__Bacteria;p__Proteobacteria;c__Deltaproteobacteria;o__Myxococcales;f__Polyangiaceae;g__;s__
OTU_18	3.06645e-06	0.879024	0.00800517	0.00497216	0.00402745	0.0018397	0.00134248	0.00144193	0.0111874	0.0115851	0.00989459	0.000596659	0.00223747	0.00169053	0.0295843	0.0572792	0.0582239	0.00372912	0.00149165	0.00134248	0.00248608	0.0177506	0.00402745	0.0018397	0.00298329	0.00268496	k__Bacteria;p__Cyanobacteria;c__Chloroplast;o__Cryptophyta;f__;g__;s__
OTU_728	3.01892e-06	0.87927	0.000248608	0.000198886	0	0.000397772	0.000298329	9.94431e-05	4.97216e-05	0.000198886	9.94431e-05	0.00109387	0.000696102	0.00119332	0	0.000198886	4.97216e-05	0.000198886	0.000348051	0.000397772	4.97216e-05	4.97216e-05	4.97216e-05	4.97216e-05	4.97216e-05	0	k__Bacteria;p__Proteobacteria;c__Deltaproteobacteria;o__Myxococcales;f__Haliangiaceae;g__;s__
OTU_824	2.7861e-06	0.880521	9.94431e-05	9.94431e-05	0	0.000596659	0.000596659	0.00104415	4.97216e-05	0.000149165	0	0.000198886	0.000198886	4.97216e-05	4.97216e-05	0	0	0.000348051	9.94431e-05	4.97216e-05	9.94431e-05	0	9.94431e-05	4.97216e-05	4.97216e-05	9.94431e-05	k__Bacteria;p__Spirochaetes;c__[Leptospirae];o__[Leptospirales];f__Leptospiraceae;g__Turneriella;s__
OTU_56	2.53142e-06	0.881998	0.00402745	0.00248608	0.00362967	0.000447494	0.000397772	0.000795545	0.00213803	0.00243636	0.00223747	0.000149165	0.000348051	0.000298329	0.00268496	0.00223747	0.00213803	0.000198886	0.000348051	0.000397772	0.00213803	0.00497216	0.00362967	0.000248608	0.000198886	0.000248608	k__Bacteria;p__Actinobacteria;c__Actinobacteria;o__Actinomycetales;f__ACK-M1;g__;s__
OTU_242	2.43965e-06	0.882562	0.000696102	0.000248608	0.000397772	0.00124304	0.000795545	0.000795545	0.000298329	0.000298329	0.000198886	0.000248608	0.000348051	0.000397772	0.000149165	0	0	0.000248608	0.000248608	0.000348051	9.94431e-05	9.94431e-05	4.97216e-05	4.97216e-05	9.94431e-05	0.000149165	k__Bacteria;p__Proteobacteria;c__Deltaproteobacteria;o__Desulfarculales;f__Desulfarculaceae;g__;s__
OTU_178	2.37676e-06	0.882959	0.000497216	0.000745823	0.000298329	0.00357995	0.00348051	0.00233691	0.00064638	0.000546937	0.000894988	0.00402745	0.00213803	0.00159109	0.000596659	0.000596659	0.000447494	0.000298329	0.000546937	0.000447494	0.000497216	0.000248608	0.000348051	0	0.000149165	4.97216e-05	k__Bacteria;p__Proteobacteria;c__Betaproteobacteria;o__SC-I-84;f__;g__;s__
OTU_533	2.22322e-06	0.883969	0.000497216	0.000696102	0.000497216	0.00124304	0.00109387	0.00124304	0.000298329	0.00064638	0.000397772	0.000894988	0.00124304	0.000745823	0.000248608	0.000198886	0.000397772	0.00188942	0.00154137	0.00278441	0.000248608	0.000348051	0.000497216	0.000198886	9.94431e-05	0.000149165	k__Bacteria;p__Bacteroidetes;c__[Saprospirae];o__[Saprospirales];f__Chitinophagaceae
OTU_170	2.2222e-06	0.883975	0.0013922	0.00149165	0.000845267	0.00278441	0.00218775	0.00203858	0.000994431	0.000546937	0.000994431	0.00601631	0.00666269	0.00308274	0.000497216	0.000596659	0.000596659	0.000596659	0.000696102	0.000845267	0.00134248	0.000795545	0.00129276	0.000198886	0.000298329	0.000397772	k__Bacteria;p__Proteobacteria;c__Betaproteobacteria;o__Burkholderiales;f__Comamonadaceae
OTU_238	2.19514e-06	0.88416	0.000149165	0.000198886	9.94431e-05	0.00258552	0.00164081	0.00129276	0	0.000149165	9.94431e-05	0.000198886	0.000198886	0.000298329	9.94431e-05	9.94431e-05	9.94431e-05	0.000149165	0.000149165	0	0	0	0.000149165	0.000198886	0.000149165	9.94431e-05	k__Bacteria;p__Proteobacteria;c__Gammaproteobacteria;o__Xanthomonadales;f__Xanthomonadaceae
OTU_208	1.95842e-06	0.88586	9.94431e-05	0.000149165	0.000248608	0.000596659	0.000696102	0.00064638	0.000149165	0.000198886	9.94431e-05	0.000198886	0.000248608	0.000198886	0	9.94431e-05	4.97216e-05	0.000894988	0.00094471	0.00159109	0.000596659	0.000397772	0.000546937	0.000198886	0.000149165	0.000198886	k__Bacteria;p__Proteobacteria;c__Alphaproteobacteria;o__Rhodospirillales;f__Rhodospirillaceae;g__;s__
OTU_251	1.86981e-06	0.886543	9.94431e-05	0.000198886	0.000198886	0.00124304	0.00169053	0.000795545	4.97216e-05	0.000149165	4.97216e-05	0.000696102	0.000845267	0.000894988	9.94431e-05	9.94431e-05	0.000149165	0.000198886	0.000198886	0.000497216	0.000149165	0.000149165	4.97216e-05	0.000149165	9.94431e-05	0	k__Bacteria;p__Proteobacteria;c__Gammaproteobacteria;o__Xanthomonadales;f__Xanthomonadaceae
OTU_288	1.85118e-06	0.88669	0.000149165	0.000149165	4.97216e-05	9.94431e-05	0.000348051	0.000298329	0.000298329	0.000198886	0	0.000994431	0.000596659	0.000248608	4.97216e-05	9.94431e-05	9.94431e-05	0.0013922	0.00169053	0.00104415	0	4.97216e-05	9.94431e-05	4.97216e-05	0	0	k__Bacteria;p__Proteobacteria;c__Alphaproteobacteria;o__Rhodobacterales;f__Rhodobacteraceae
OTU_496	1.76832e-06	0.88736	4.97216e-05	4.97216e-05	0	0	0.000149165	0	4.97216e-05	0	4.97216e-05	0	4.97216e-05	4.97216e-05	0	0	0	0.000497216	0.00119332	0.000845267	0	4.97216e-05	0	4.97216e-05	4.97216e-05	0	k__Bacteria;p__Proteobacteria;c__Gammaproteobacteria
OTU_20	1.75825e-06	0.887443	0.00258552	0.00800517	0.00169053	0.00104415	0.00124304	0.00149165	0.00686158	0.00850239	0.0107399	0.000795545	0.000894988	0.000546937	0.00840294	0.011436	0.011784	0.00064638	0.0011436	0.00109387	0.00894988	0.00855211	0.00954654	0.000845267	0.00109387	0.00119332	k__Bacteria;p__Actinobacteria;c__Actinobacteria;o__Actinomycetales;f__ACK-M1;g__;s__
OTU_410	1.73378e-06	0.887647	4.97216e-05	0	4.97216e-05	0.000894988	0.00109387	0.000546937	9.94431e-05	9.94431e-05	4.97216e-05	9.94431e-05	9.94431e-05	4.97216e-05	4.97216e-05	0	0.000149165	9.94431e-05	0.000149165	0.000149165	9.94431e-05	4.97216e-05	4.97216e-05	4.97216e-05	4.97216e-05	9.94431e-05	k__Bacteria;p__Chloroflexi
OTU_209	1.66766e-06	0.888211	9.94431e-05	0.000198886	0.000149165	9.94431e-05	0.000149165	0.000248608	0.00124304	0.0011436	0.00134248	0.000248608	0.000248608	0.000248608	0.00064638	0.00094471	0.00149165	0.000149165	4.97216e-05	0.000298329	0.000149165	9.94431e-05	4.97216e-05	0	4.97216e-05	0.000248608	k__Bacteria;p__Proteobacteria;c__Gammaproteobacteria;o__Xanthomonadales;f__Sinobacteraceae;g__;s__
OTU_134	1.64993e-06	0.888366	0.000546937	0.000596659	0.000447494	0.000397772	4.97216e-05	0.000447494	0.000795545	0.00119332	0.000894988	0.000198886	0.000248608	0.000348051	0.000497216	0.00094471	0.00094471	9.94431e-05	9.94431e-05	0.000546937	0.00169053	0.00188942	0.00263524	0.000149165	0.000248608	9.94431e-05	k__Bacteria;p__Bacteroidetes;c__Flavobacteriia;o__Flavobacteriales;f__Cryomorphaceae;g__;s__
OTU_304	1.64549e-06	0.888405	9.94431e-05	0.000198886	4.97216e-05	0	9.94431e-05	0.000149165	9.94431e-05	0.000149165	4.97216e-05	0.000397772	0.000745823	0.000397772	4.97216e-05	0.000149165	0.000198886	0.00119332	0.00208831	0.00109387	9.94431e-05	0.000198886	0.000248608	4.97216e-05	9.94431e-05	9.94431e-05	k__Bacteria;p__Proteobacteria;c__Betaproteobacteria
OTU_1234	1.56082e-06	0.889165	0.000397772	0.000497216	9.94431e-05	0	0.000149165	0.000149165	0.000298329	0.000546937	0.000447494	9.94431e-05	0	9.94431e-05	0.000795545	0.00109387	0.00129276	0.000149165	9.94431e-05	9.94431e-05	0.000497216	0.000447494	0.00064638	0	4.97216e-05	0.000149165	k__Bacteria;p__Actinobacteria;c__Actinobacteria;o__Actinomycetales;f__Microbacteriaceae;g__;s__
OTU_176	1.46547e-06	0.890065	0.000348051	0.000596659	0.000447494	0.000546937	0.000596659	0.000596659	0.000248608	0.000497216	0.000348051	0.00701074	0.00730907	0.0032319	0.000397772	0.000248608	9.94431e-05	0.000298329	0.000745823	0.00064638	0.000397772	0.000397772	0.000596659	9.94431e-05	9.94431e-05	0.000198886	k__Bacteria;p__Proteobacteria;c__Betaproteobacteria;o__Burkholderiales;f__Comamonadaceae;g__;s__
OTU_7	1.39283e-06	0.890786	0.0198886	0.0240155	0.00785601	0.00318218	0.00377884	0.00338107	0.0204356	0.0249602	0.029286	0.00228719	0.00208831	0.00258552	0.0212311	0.028043	0.0285899	0.00248608	0.00293357	0.00318218	0.0138226	0.0131265	0.0157617	0.00278441	0.00243636	0.00213803	k__Bacteria;p__Actinobacteria;c__Actinobacteria;o__Actinomycetales;f__ACK-M1;g__;s__
OTU_91	1.38821e-06	0.890833	0.000745823	0.000397772	0.000546937	0.000696102	0.000845267	0.000546937	0.00159109	0.00268496	0.00273469	0.000596659	0.000845267	0.000745823	0.00149165	0.00213803	0.00169053	0.0011436	0.00149165	0.00159109	0.000397772	0.000298329	0.000348051	0.000248608	0.000447494	0.000298329	k__Bacteria;p__Proteobacteria;c__Gammaproteobacteria;o__Methylococcales;f__Methylococcaceae;g__Methylomonas;s__
OTU_2551	1.38724e-06	0.890843	0.000348051	0.000447494	0.000248608	0.00268496	0.00308274	0.003928	0.000348051	0.000546937	0.000596659	0.00169053	0.00094471	0.00333134	0.000248608	0.000248608	0.000149165	0.00064638	0.000745823	0.000845267	0.000248608	4.97216e-05	0.000298329	0.000397772	0.000248608	9.94431e-05	k__Bacteria;p__Nitrospirae;c__Nitrospira;o__Nitrospirales;f__Nitrospiraceae;g__Nitrospira;s__
OTU_28	1.35217e-06	0.891204	0.00949682	0.0168556	0.00875099	0.00894988	0.00934765	0.0071599	0.0193417	0.0134745	0.0180986	0.0509646	0.0474344	0.0279435	0.00894988	0.0113862	0.0119829	0.00875099	0.0153142	0.0155628	0.00974543	0.0076074	0.00865155	0.00233691	0.00288385	0.00268496	k__Bacteria;p__Proteobacteria;c__Betaproteobacteria;o__Burkholderiales;f__Comamonadaceae
OTU_287	1.23058e-06	0.892521	0.000198886	0.000795545	0.000497216	0.000149165	0.000149165	0.000248608	0.0011436	0.0013922	0.00149165	4.97216e-05	0.000248608	0.000198886	0.000696102	0.00109387	0.00134248	0.000198886	0.000298329	0.000397772	9.94431e-05	4.97216e-05	4.97216e-05	9.94431e-05	9.94431e-05	0.000149165	k__Bacteria;p__Verrucomicrobia;c__Opitutae;o__Opitutales;f__Opitutaceae;g__Opitutus;s__
OTU_473	1.13443e-06	0.893645	4.97216e-05	4.97216e-05	9.94431e-05	0	0.000149165	0.000149165	4.97216e-05	4.97216e-05	0.000149165	0.000596659	0.000795545	0.00109387	9.94431e-05	4.97216e-05	4.97216e-05	0	0.000149165	9.94431e-05	9.94431e-05	0	9.94431e-05	9.94431e-05	0	0	k__Bacteria;p__Proteobacteria;c__Gammaproteobacteria;o__Methylococcales
OTU_1183	1.1191e-06	0.893832	9.94431e-05	0.00064638	0.000198886	0.0011436	0.000795545	0.000795545	0.00134248	0.0011436	0.00134248	0.0011436	0.00124304	0.000745823	0.000348051	0.000546937	0.000348051	9.94431e-05	0.000348051	0.000198886	0.000546937	0.000198886	0.000348051	0.000198886	0.000149165	9.94431e-05	k__Bacteria;p__Proteobacteria;c__Betaproteobacteria;o__Rhodocyclales;f__Rhodocyclaceae
OTU_1080	1.10102e-06	0.894055	0.00149165	0.00263524	0.00308274	0.000845267	0.000745823	0.000795545	0.00268496	0.00402745	0.00402745	0.000447494	0.000447494	0.000447494	0.00288385	0.00541965	0.00472355	0.00064638	0.000447494	0.000397772	0.000745823	0.000696102	0.00064638	0.000298329	0.000546937	0.000546937	k__Bacteria;p__Actinobacteria;c__Actinobacteria;o__Actinomycetales
OTU_15	1.08826e-06	0.894214	0.00198886	0.00233691	0.0013922	0.00218775	0.0032319	0.00203858	0.00154137	0.0018397	0.00144193	0.00353023	0.0032319	0.0025358	0.00124304	0.0011436	0.00129276	0.0226233	0.0519093	0.0363962	0.00178998	0.00094471	0.00193914	0.00134248	0.00164081	0.00119332	k__Bacteria;p__Proteobacteria;c__Alphaproteobacteria
OTU_310	1.07447e-06	0.894389	0.00104415	0.000397772	0.000198886	0.000298329	0.000397772	0.000745823	4.97216e-05	0.000248608	0.000397772	0.000497216	0.000497216	0.000397772	9.94431e-05	4.97216e-05	9.94431e-05	0.00154137	0.00273469	0.00248608	0.000149165	0	0.000149165	0.000348051	0.000198886	4.97216e-05	k__Bacteria;p__Proteobacteria;c__Alphaproteobacteria;o__Rhodospirillales;f__Acetobacteraceae;g__;s__
OTU_312	1.03604e-06	0.894884	9.94431e-05	9.94431e-05	0.000149165	9.94431e-05	0.000248608	9.94431e-05	9.94431e-05	0.000149165	9.94431e-05	0.000198886	0.000198886	0.000149165	4.97216e-05	4.97216e-05	0.000149165	0.00109387	0.00228719	0.00144193	9.94431e-05	4.97216e-05	0.000149165	0.000149165	9.94431e-05	0	k__Bacteria;p__Proteobacteria;c__Alphaproteobacteria;o__Rhizobiales;f__Xanthobacteraceae
OTU_54	1.00804e-06	0.895255	0.00223747	0.00134248	0.000994431	0.00208831	0.00228719	0.00188942	0.000894988	0.000994431	0.00104415	0.00248608	0.00288385	0.00223747	0.000845267	0.000447494	0.00104415	0.00149165	0.0018397	0.00208831	0.000596659	0.00094471	0.000795545	0.0076074	0.0147176	0.0105907	k__Bacteria;p__Proteobacteria;c__Alphaproteobacteria;o__Sphingomonadales;f__Sphingomonadaceae;g__Novosphingobium;s__
OTU_119	9.49921e-07	0.896056	0.000348051	0.000696102	9.94431e-05	0.000497216	0.000248608	0.000397772	0.000298329	0.000397772	4.97216e-05	0.000198886	0.000248608	0.00064638	0.000149165	0.000248608	0.000248608	0.00144193	0.000745823	0.000397772	0.00243636	0.00283413	0.0036794	9.94431e-05	9.94431e-05	0.000149165	k__Bacteria;p__Planctomycetes;c__Planctomycetia;o__Pirellulales;f__Pirellulaceae;g__;s__
OTU_1538	7.79517e-07	0.898674	0.000198886	9.94431e-05	0.000149165	0.000149165	0.000149165	9.94431e-05	4.97216e-05	0.000248608	0.000149165	0.000149165	9.94431e-05	0.000149165	4.97216e-05	9.94431e-05	0.000149165	0.000198886	0.000348051	0.000348051	0.000248608	0	4.97216e-05	0.00213803	0.00248608	0.00119332	k__Bacteria;p__Proteobacteria;c__Alphaproteobacteria;o__Rhizobiales
OTU_354	7.45165e-07	0.899261	4.97216e-05	4.97216e-05	0.000248608	9.94431e-05	9.94431e-05	4.97216e-05	0	0	0	0	0.000198886	9.94431e-05	0.000149165	4.97216e-05	0	9.94431e-05	9.94431e-05	0.000149165	4.97216e-05	0	4.97216e-05	0.000745823	0.0011436	0.000745823	k__Bacteria;p__Bacteroidetes;c__[Saprospirae];o__[Saprospirales];f__Chitinophagaceae;g__;s__
OTU_3641	6.82591e-07	0.900394	0.00293357	0.00268496	0.00343079	0.00149165	0.00149165	0.00144193	0.00149165	0.00109387	0.00169053	0.0105907	0.0100438	0.00532021	0.000696102	0.000596659	0.00064638	0.000845267	0.00119332	0.00208831	0.00278441	0.0025358	0.0025358	0.000198886	0.000596659	0.00064638	k__Bacteria;p__Proteobacteria;c__Betaproteobacteria;o__Burkholderiales;f__Comamonadaceae;g__Rubrivivax;s__
OTU_225	6.15221e-07	0.901719	0.000198886	0.00064638	0.000298329	0.00064638	0.000596659	0.000546937	0.000596659	0.00149165	0.000745823	0.000198886	0.000397772	0.000248608	0.00198886	0.00273469	0.00318218	0.000198886	0.000298329	0.000397772	0.000248608	0.000248608	0.000198886	0.000298329	0.000198886	0.000149165	k__Bacteria;p__Proteobacteria;c__Deltaproteobacteria;o__Myxococcales;f__Myxococcaceae;g__;s__
OTU_444	5.68466e-07	0.902715	0.000149165	9.94431e-05	0	0.000198886	0.000149165	9.94431e-05	9.94431e-05	0.000149165	9.94431e-05	9.94431e-05	9.94431e-05	0.000149165	9.94431e-05	0	0	0.000497216	0.000596659	0.000447494	0.00124304	0.000745823	0.000696102	0	0.000149165	4.97216e-05	k__Bacteria;p__Proteobacteria
OTU_118	5.62982e-07	0.902836	0.000149165	0.000149165	0.000298329	0.000298329	0.000397772	0.000248608	0.0011436	0.00159109	0.00203858	0.000397772	0.000348051	0.000546937	0.00164081	0.00278441	0.00243636	0.000397772	0.000298329	0.00064638	0.000198886	0.000248608	0.000298329	4.97216e-05	0.000149165	0.000149165	k__Bacteria;p__Proteobacteria;c__Gammaproteobacteria;o__Methylococcales;f__Methylococcaceae;g__Methylocaldum;s__
OTU_875	5.60871e-07	0.902883	9.94431e-05	0.000397772	9.94431e-05	0.000994431	0.00104415	0.000795545	0.000298329	0.000248608	0.000149165	0.000348051	0.000497216	0.000298329	0	4.97216e-05	0.000248608	0.000894988	0.000696102	0.00134248	0	0	9.94431e-05	0	0	0.000198886	k__Bacteria;p__Proteobacteria;c__Gammaproteobacteria;o__Xanthomonadales;f__Sinobacteraceae;g__;s__
OTU_68	5.30515e-07	0.903576	0.000546937	0.0013922	0.000149165	0.000745823	0.000546937	0.000497216	0.00233691	0.00298329	0.00288385	0.000397772	0.000447494	0.00064638	0.00203858	0.00193914	0.00243636	0.000447494	0.000994431	0.000745823	0.000298329	0.000248608	0.000298329	0.000248608	0.000348051	0.000248608	k__Bacteria;p__Proteobacteria;c__Deltaproteobacteria
OTU_452	5.28334e-07	0.903627	4.97216e-05	9.94431e-05	9.94431e-05	0.00094471	0.00109387	0.00064638	0.000149165	4.97216e-05	4.97216e-05	0.000348051	0.000397772	0.000447494	0.000198886	9.94431e-05	4.97216e-05	9.94431e-05	0.000149165	0.000298329	4.97216e-05	0.000149165	9.94431e-05	9.94431e-05	4.97216e-05	0	k__Bacteria;p__Proteobacteria;c__Gammaproteobacteria;o__;f__;g__;s__
OTU_29	5.17745e-07	0.903878	0.00442522	0.00556881	0.00248608	0.00238663	0.00154137	0.00159109	0.00616547	0.00825378	0.00870127	0.00129276	0.00164081	0.00188942	0.00636436	0.00870127	0.00929793	0.00223747	0.00223747	0.00308274	0.00790573	0.00661297	0.00671241	0.000745823	0.000894988	0.000546937	k__Bacteria;p__Bacteroidetes;c__[Saprospirae];o__[Saprospirales];f__Chitinophagaceae
OTU_110	5.06968e-07	0.904138	0.000198886	0.000149165	9.94431e-05	0.000447494	0.000397772	0.000397772	0.00169053	0.00233691	0.00273469	0.000298329	0.000149165	0.000348051	0.00104415	0.00109387	0.00208831	0.000198886	9.94431e-05	0.000348051	0.000149165	9.94431e-05	0.000248608	4.97216e-05	9.94431e-05	0.000248608	k__Bacteria;p__Proteobacteria;c__Deltaproteobacteria;o__Myxococcales;f__OM27;g__;s__
OTU_255	4.99429e-07	0.904323	0.000596659	0.0011436	0.0013922	0.000397772	0.00064638	0.000795545	0.000149165	0.000397772	0.000348051	0.00064638	0.000497216	0.000497216	0.000198886	0.000546937	0.000298329	0.000795545	0.000994431	0.000745823	0.00198886	0.00238663	0.00313246	0.000198886	0.000198886	0.000198886	k__Bacteria;p__Proteobacteria;c__Alphaproteobacteria;o__Rhodospirillales;f__Acetobacteraceae;g__;s__
OTU_486	4.66242e-07	0.905166	0.000348051	0.000198886	0.000198886	0.000795545	0.000994431	0.00109387	0.000298329	0.000348051	0.000497216	0.000894988	0.00149165	0.00094471	0.000149165	0.000198886	0.000149165	0.000696102	0.000298329	0.000696102	9.94431e-05	0.000149165	4.97216e-05	9.94431e-05	0.000149165	4.97216e-05	k__Bacteria;p__Proteobacteria;c__Betaproteobacteria;o__Burkholderiales;f__;g__;s__
OTU_66	4.63349e-07	0.905242	0.000696102	0.000546937	0.00094471	0.000894988	0.00134248	0.00169053	0.000795545	0.000596659	0.000894988	0.00541965	0.00825378	0.00711018	0.000397772	0.00064638	0.000497216	0.00169053	0.00174025	0.00462411	0.000696102	0.000745823	0.000546937	0.000348051	0.000198886	0.000298329	k__Bacteria;p__Proteobacteria;c__Betaproteobacteria;o__Ellin6067;f__;g__;s__
OTU_4568	4.57342e-07	0.905401	0.00124304	0.00193914	0.00164081	0.00283413	0.00278441	0.00263524	0.00164081	0.00154137	0.00198886	0.00860183	0.00770684	0.00671241	0.00134248	0.00134248	0.00154137	0.00357995	0.00556881	0.00855211	0.00109387	0.000745823	0.00094471	0.000198886	0.000248608	0.000348051	k__Bacteria;p__Proteobacteria;c__Betaproteobacteria;o__Burkholderiales;f__Comamonadaceae
OTU_4340	4.56879e-07	0.905413	0.000198886	9.94431e-05	0	0.000348051	0.000745823	0.000348051	9.94431e-05	0.000248608	0.000149165	0.000447494	9.94431e-05	0.000397772	0	9.94431e-05	0	0.00094471	0.0011436	0.00124304	9.94431e-05	0	4.97216e-05	4.97216e-05	0.000149165	9.94431e-05	k__Bacteria;p__Proteobacteria;c__Alphaproteobacteria;o__Rhizobiales;f__Hyphomicrobiaceae
OTU_1637	4.525e-07	0.90553	0.0121818	0.0064638	0.00318218	0.00154137	0.00134248	0.00119332	0.00711018	0.00840294	0.00810461	0.000298329	0.00174025	0.00119332	0.0299324	0.0538982	0.0552407	0.00362967	0.000894988	0.00119332	0.00412689	0.00964598	0.00522076	0.00144193	0.00213803	0.00318218	k__Bacteria;p__Cyanobacteria;c__Chloroplast;o__Cryptophyta;f__;g__;s__
OTU_525	4.45923e-07	0.905708	4.97216e-05	0.000149165	0.000149165	0.000198886	0.000298329	0.000348051	4.97216e-05	0.000149165	4.97216e-05	0.00129276	0.000397772	0.000397772	4.97216e-05	4.97216e-05	0.000149165	0.00208831	0.00333134	0.00193914	9.94431e-05	4.97216e-05	9.94431e-05	0.000248608	0.000149165	0.000298329	k__Bacteria;p__Proteobacteria;c__Alphaproteobacteria;o__Rhodobacterales;f__Rhodobacteraceae
OTU_49	4.11993e-07	0.906663	0.000696102	0.0011436	0.000745823	0.00119332	0.00134248	0.000894988	0.00174025	0.00198886	0.00208831	0.000745823	0.000994431	0.00124304	0.00382856	0.00551909	0.00656325	0.00124304	0.000894988	0.00109387	0.000894988	0.000696102	0.000994431	0.000795545	0.00064638	0.000745823	k__Bacteria;p__Armatimonadetes;c__Armatimonadia;o__Armatimonadales;f__Armatimonadaceae;g__;s__
OTU_433	4.00151e-07	0.907013	4.97216e-05	0	9.94431e-05	0.000845267	0.000994431	0.00159109	9.94431e-05	0	4.97216e-05	9.94431e-05	9.94431e-05	4.97216e-05	9.94431e-05	0.000149165	4.97216e-05	0	0	4.97216e-05	4.97216e-05	0	4.97216e-05	4.97216e-05	0	0	k__Bacteria;p__Chloroflexi;c__Anaerolineae;o__H39;f__;g__;s__
OTU_39	3.87983e-07	0.907381	0.00268496	0.00497216	0.00288385	0.00666269	0.0076074	0.00725935	0.00178998	0.00268496	0.00313246	0.00904932	0.00666269	0.00417661	0.00134248	0.00233691	0.00188942	0.00487271	0.00661297	0.00551909	0.000894988	0.00144193	0.00119332	0.00094471	0.00164081	0.00104415	k__Bacteria;p__Proteobacteria;c__Alphaproteobacteria;o__Rhizobiales;f__;g__;s__
OTU_103	3.84522e-07	0.907488	0.000348051	0.000397772	0.000348051	0.00208831	0.00218775	0.00144193	0.000298329	0.000447494	0.000149165	0.000994431	0.000745823	0.000745823	0.000198886	0.000298329	0.000298329	0.00362967	0.00278441	0.0050716	0.000198886	0.000298329	0.000497216	0.000198886	0.000248608	0.000248608	k__Bacteria;p__Proteobacteria;c__Deltaproteobacteria;o__Myxococcales
OTU_381	3.48059e-07	0.908666	0.000994431	0.0011436	0.00064638	0.0011436	0.00124304	0.00064638	0.00144193	0.00223747	0.00159109	0.00064638	0.000745823	0.000745823	0.00348051	0.00536993	0.00606603	0.000696102	0.000745823	0.000795545	0.000447494	0.000397772	0.000546937	0.000348051	0.000348051	0.000397772	k__Bacteria;p__Proteobacteria;c__Deltaproteobacteria;o__Myxococcales;f__Myxococcaceae;g__;s__
OTU_77	3.44016e-07	0.908803	0.000596659	0.000546937	0.000348051	0.000596659	0.000497216	0.00064638	0.000198886	0.000397772	0.000447494	0.000348051	0.000497216	0.000248608	9.94431e-05	0.000248608	0.000348051	0.000546937	0.000546937	0.000696102	0.000248608	0.000447494	0.000298329	0.00303302	0.00581742	0.00462411	k__Bacteria;p__Bacteroidetes;c__[Saprospirae];o__[Saprospirales];f__Saprospiraceae;g__Haliscomenobacter;s__
OTU_226	3.1949e-07	0.909665	9.94431e-05	0.000248608	0.000248608	0.000447494	0.000149165	0.000198886	0.000845267	0.00094471	0.00134248	0.000248608	0.000198886	0.000248608	0.00119332	0.00188942	0.00174025	4.97216e-05	0.000198886	0.000149165	0.000596659	0.000298329	0.000198886	4.97216e-05	4.97216e-05	4.97216e-05	k__Bacteria;p__Actinobacteria;c__Actinobacteria;o__Actinomycetales;f__Microbacteriaceae
OTU_65	3.19483e-07	0.909666	0.000447494	0.000397772	0.000397772	0.000546937	0.000696102	0.000447494	0.000248608	0.000497216	0.000248608	0.000696102	0.000348051	0.000596659	0.000348051	0.000248608	0.000298329	0.000596659	0.000447494	0.00064638	0.000546937	0.000298329	0.000348051	0.00382856	0.00711018	0.00497216	k__Bacteria;p__Proteobacteria;c__Alphaproteobacteria;o__Caulobacterales;f__Caulobacteraceae;g__;s__
OTU_254	2.89321e-07	0.910809	4.97216e-05	9.94431e-05	4.97216e-05	4.97216e-05	0	0	0.000149165	0.000248608	0	0	9.94431e-05	0.000149165	9.94431e-05	0.000298329	0.000348051	9.94431e-05	0	4.97216e-05	4.97216e-05	0.000149165	4.97216e-05	0.00119332	0.00109387	0.00188942	k__Bacteria;p__Cyanobacteria;c__Chloroplast
OTU_50	2.65915e-07	0.91177	0.000546937	0.000298329	0.000198886	0.00124304	0.00104415	0.00064638	0.000497216	0.000447494	0.000447494	0.000894988	0.000795545	0.000546937	0.000248608	0.000546937	0.000497216	0.000795545	0.00134248	0.00159109	0.000348051	0.000397772	0.000546937	0.0050716	0.00914877	0.00631464	k__Bacteria;p__Proteobacteria;c__Alphaproteobacteria
OTU_318	2.57211e-07	0.912147	0.000447494	0.000447494	0.000546937	0.00064638	0.00094471	0.000447494	0.000397772	0.00064638	0.000696102	0.00104415	0.000546937	0.000497216	0.000348051	0.000546937	0.000447494	0.00149165	0.00198886	0.00159109	4.97216e-05	0.000198886	9.94431e-05	4.97216e-05	0.000198886	0.000298329	k__Bacteria;p__Proteobacteria;c__Alphaproteobacteria;o__Rhodospirillales
OTU_6	2.54463e-07	0.912268	0.00348051	0.00387828	0.00497216	0.00586714	0.00601631	0.00820406	0.0121818	0.00860183	0.0096957	0.00198886	0.00288385	0.0032319	0.0184467	0.00566826	0.0071599	0.00278441	0.00397772	0.00333134	0.0150656	0.0141209	0.0145187	0.0278441	0.025706	0.0242641	k__Bacteria;p__Firmicutes;c__Bacilli;o__Lactobacillales;f__Streptococcaceae;g__Lactococcus;s__
OTU_510	2.41302e-07	0.912864	4.97216e-05	0.000149165	0	9.94431e-05	4.97216e-05	0	4.97216e-05	4.97216e-05	0	9.94431e-05	0.000149165	4.97216e-05	0	0	0.000149165	0.000497216	0.00104415	0.000845267	0	4.97216e-05	4.97216e-05	0	4.97216e-05	4.97216e-05	k__Bacteria;p__Proteobacteria;c__Alphaproteobacteria;o__Rhodospirillales
OTU_1002	2.39917e-07	0.912928	9.94431e-05	9.94431e-05	0.000198886	0.000298329	0.000397772	0.000298329	0.000198886	4.97216e-05	0.000149165	0.00218775	0.00198886	0.0011436	0	0.000149165	4.97216e-05	0.000546937	0.000546937	0.000447494	4.97216e-05	0.000198886	9.94431e-05	4.97216e-05	0.000248608	9.94431e-05	k__Bacteria;p__Proteobacteria;c__Alphaproteobacteria;o__Sphingomonadales;f__Sphingomonadaceae;g__Novosphingobium;s__
OTU_26	2.34983e-07	0.91316	0.00233691	0.00213803	0.00606603	0.00616547	0.00626492	0.0064638	0.00144193	0.00203858	0.00203858	0.015364	0.0127287	0.00606603	0.0013922	0.00154137	0.00124304	0.01964	0.0335621	0.0225239	0.00188942	0.00193914	0.00243636	0.0018397	0.00238663	0.00174025	k__Bacteria;p__Proteobacteria;c__Alphaproteobacteria;o__Rhodobacterales;f__Rhodobacteraceae;g__Rhodobacter;s__
OTU_12	2.25871e-07	0.9136	0.0155628	0.00800517	0.0102924	0.00407717	0.00263524	0.00273469	0.0139718	0.0174025	0.0212311	0.00487271	0.00487271	0.00482299	0.0113862	0.0127784	0.014817	0.00159109	0.00308274	0.00308274	0.00298329	0.00228719	0.00283413	0.00164081	0.0011436	0.00109387	k__Bacteria;p__Proteobacteria;c__Betaproteobacteria;o__Methylophilales;f__Methylophilaceae;g__;s__
OTU_57	2.24337e-07	0.913675	0.00333134	0.00527049	0.00477327	0.000894988	0.000497216	0.000447494	0.000546937	0.00149165	0.00104415	0.000596659	0.00064638	0.000497216	0.00119332	0.00178998	0.00164081	0.000497216	0.000348051	0.000696102	0.000745823	0.000397772	0.000348051	0.000497216	0.000248608	0.000546937	k__Bacteria;p__Chlorobi;c__OPB56;o__;f__;g__;s__
OTU_94	2.15716e-07	0.914108	0.00382856	0.00377884	0.00487271	0.000696102	0.000894988	0.000696102	0.00124304	0.00164081	0.00154137	0.000497216	0.000745823	0.000894988	0.000696102	0.00124304	0.00144193	0.000497216	0.000596659	0.00064638	0.00343079	0.00348051	0.00586714	0.00064638	0.000348051	0.000596659	k__Bacteria;p__Planctomycetes;c__Phycisphaerae;o__Phycisphaerales;f__;g__;s__
OTU_84	2.14466e-07	0.914172	0.00104415	0.000447494	0.000596659	0.00208831	0.00169053	0.00174025	0.000546937	0.000546937	0.00064638	0.00313246	0.00278441	0.00159109	0.000447494	0.000248608	0.000397772	0.00104415	0.0011436	0.00154137	0.000447494	0.000348051	0.000298329	9.94431e-05	0.000149165	4.97216e-05	k__Bacteria;p__Proteobacteria;c__Betaproteobacteria
OTU_192	2.07792e-07	0.91452	0.000149165	0.000248608	9.94431e-05	0.00064638	0.000845267	0.000497216	0.000198886	0.000248608	0.000198886	0.000397772	0.00064638	0.000745823	4.97216e-05	0.000198886	0.000149165	0.00164081	0.00303302	0.00198886	0.000198886	0.000248608	9.94431e-05	0.000149165	9.94431e-05	9.94431e-05	k__Bacteria;p__Bacteroidetes;c__[Saprospirae];o__[Saprospirales];f__Saprospiraceae
OTU_120	1.94309e-07	0.915252	0.00164081	0.000298329	4.97216e-05	0.00109387	0.00104415	0.000795545	0.000248608	0.000348051	0.000447494	0.000348051	0.000298329	0.000198886	0.000198886	0.000198886	0.000198886	0.00243636	0.00263524	0.00273469	0.000149165	0.000149165	0.000198886	0.000149165	9.94431e-05	9.94431e-05	k__Bacteria;p__Proteobacteria;c__Alphaproteobacteria;o__Sphingomonadales;f__Sphingomonadaceae;g__;s__
OTU_141	1.90227e-07	0.915483	0.000198886	0.000248608	0.000149165	0.000149165	0.000397772	0.000198886	0.00109387	0.00188942	0.00159109	0.000348051	0.000149165	0.000348051	0.00144193	0.00188942	0.00134248	0.000348051	0.000198886	0.000248608	0.000248608	0.000248608	0.000198886	0.000198886	0.000149165	9.94431e-05	k__Bacteria;p__Proteobacteria;c__Alphaproteobacteria;o__Rickettsiales;f__;g__;s__
OTU_47	1.71048e-07	0.916626	0.000497216	0.000696102	0.000248608	0.0011436	0.00119332	0.0011436	0.000447494	0.000397772	0.000447494	0.00124304	0.00124304	0.000795545	0.000447494	0.000497216	0.000298329	0.00193914	0.00551909	0.00203858	0.000745823	0.000596659	0.000397772	0.00865155	0.00770684	0.00666269	k__Bacteria;p__Proteobacteria;c__Alphaproteobacteria;o__Rhizobiales;f__Hyphomicrobiaceae;g__;s__
OTU_611	1.64506e-07	0.917042	0.000149165	0.000149165	0	0.000596659	0.00094471	0.00119332	4.97216e-05	4.97216e-05	4.97216e-05	0	0	9.94431e-05	0	0	4.97216e-05	0.000248608	0.000198886	9.94431e-05	4.97216e-05	0	9.94431e-05	0	0	0	k__Bacteria;p__Proteobacteria;c__Deltaproteobacteria;o__Myxococcales;f__;g__;s__
OTU_222	1.63822e-07	0.917087	4.97216e-05	4.97216e-05	4.97216e-05	9.94431e-05	0.000298329	4.97216e-05	9.94431e-05	0.000149165	4.97216e-05	9.94431e-05	0.000149165	0.000149165	0.000149165	9.94431e-05	9.94431e-05	0.0013922	0.00273469	0.0018397	9.94431e-05	0	4.97216e-05	0.000298329	0.000149165	9.94431e-05	k__Bacteria;p__Proteobacteria;c__Alphaproteobacteria;o__Rhodospirillales;f__Rhodospirillaceae
OTU_371	1.63574e-07	0.917103	9.94431e-05	9.94431e-05	4.97216e-05	0.000248608	0.000198886	0	9.94431e-05	9.94431e-05	4.97216e-05	0.000298329	9.94431e-05	4.97216e-05	4.97216e-05	9.94431e-05	0	0.000149165	0.000348051	0.000298329	4.97216e-05	9.94431e-05	0.000149165	0.00119332	0.00213803	0.00178998	k__Bacteria;p__Proteobacteria;c__Alphaproteobacteria;o__Rhizobiales;f__Hyphomicrobiaceae
OTU_275	1.62145e-07	0.917196	0.000149165	9.94431e-05	0	0.000248608	9.94431e-05	0	0.00104415	0.00104415	0.000994431	9.94431e-05	0.000298329	0.000298329	0.000198886	0.000348051	0.000397772	0.000397772	0.000149165	0.000298329	4.97216e-05	0.000149165	0.000149165	0.000198886	4.97216e-05	4.97216e-05	k__Bacteria;p__Verrucomicrobia;c__Opitutae;o__Opitutales;f__Opitutaceae;g__Opitutus;s__
OTU_53	1.60832e-07	0.917282	0.00064638	0.000447494	0.000596659	0.00144193	0.00169053	0.00119332	0.00238663	0.00338107	0.00377884	0.0013922	0.00263524	0.00208831	0.00303302	0.00387828	0.00412689	0.000894988	0.000845267	0.000845267	0.000745823	0.000447494	0.000348051	0.000497216	0.000447494	0.000447494	k__Bacteria;p__Proteobacteria;c__Gammaproteobacteria;o__Methylococcales
OTU_370	1.57707e-07	0.91749	0.000198886	9.94431e-05	0.000198886	0.00178998	0.0018397	0.00308274	0.000149165	9.94431e-05	9.94431e-05	0.000149165	0.000397772	9.94431e-05	0.000149165	0.000149165	0.000149165	0.000248608	0.000248608	0.000198886	9.94431e-05	0.000149165	9.94431e-05	0.000149165	4.97216e-05	0	k__Bacteria;p__Gemmatimonadetes;c__Gemm-1;o__;f__;g__;s__
OTU_795	1.53778e-07	0.917756	0.000149165	9.94431e-05	9.94431e-05	0.000795545	0.000845267	0.00129276	4.97216e-05	0.000149165	0	4.97216e-05	9.94431e-05	0.000198886	4.97216e-05	0	0.000198886	4.97216e-05	4.97216e-05	9.94431e-05	9.94431e-05	0.000149165	4.97216e-05	0	9.94431e-05	0	k__Bacteria;p__Gemmatimonadetes;c__Gemm-1;o__;f__;g__;s__
OTU_388	1.04668e-07	0.92171	4.97216e-05	4.97216e-05	0.000149165	0.00154137	0.00109387	0.00208831	0.000198886	0	0	0	0.000198886	9.94431e-05	4.97216e-05	9.94431e-05	9.94431e-05	0.000149165	4.97216e-05	4.97216e-05	4.97216e-05	0	0.000149165	0	0	0	k__Bacteria
OTU_4237	9.22126e-08	0.922969	0.000248608	0.000546937	0.000198886	0.00303302	0.00308274	0.00223747	0.00134248	0.000447494	0.000994431	0.0013922	0.00144193	0.00238663	0.000546937	0.000298329	0.000397772	0.000149165	0.000198886	0.000546937	0.000348051	0.000348051	0.000298329	9.94431e-05	0.000149165	0.000198886	k__Bacteria;p__Proteobacteria;c__Betaproteobacteria;o__Rhodocyclales;f__Rhodocyclaceae
OTU_3639	9.06869e-08	0.923133	0.000198886	0.000248608	0.000497216	4.97216e-05	0.000149165	9.94431e-05	0	0	0	0.000198886	0.000198886	0.000198886	0	0.000198886	4.97216e-05	0.00094471	0.0011436	0.00149165	4.97216e-05	4.97216e-05	0	4.97216e-05	0	0	k__Bacteria;p__Bacteroidetes;c__[Saprospirae];o__[Saprospirales];f__Chitinophagaceae
OTU_411	7.64652e-08	0.924792	4.97216e-05	0	9.94431e-05	4.97216e-05	0	4.97216e-05	9.94431e-05	0	9.94431e-05	0.000149165	0	0	0	4.97216e-05	0	0.00124304	0.000696102	0.00119332	4.97216e-05	0	9.94431e-05	0	9.94431e-05	4.97216e-05	k__Bacteria;p__Proteobacteria;c__Gammaproteobacteria;o__HTCC2188;f__HTCC2089;g__;s__
OTU_69	7.58806e-08	0.924866	0.000696102	0.000298329	0.000397772	0.000397772	0.000149165	0	0.00213803	0.00273469	0.00238663	0	4.97216e-05	9.94431e-05	0.00288385	0.00492243	0.00417661	0.000348051	0.000149165	0.000248608	0.000149165	0.00124304	0.000248608	0.000198886	9.94431e-05	0.000348051	k__Bacteria;p__Cyanobacteria;c__Chloroplast;o__Cryptophyta;f__;g__;s__
OTU_253	6.58326e-08	0.926218	9.94431e-05	4.97216e-05	9.94431e-05	0.000795545	0.00129276	0.00119332	0.000149165	0.000149165	0.000149165	0.000497216	0.000546937	0.000795545	0.000149165	0.000149165	0.000248608	0.000696102	0.000696102	0.00104415	0.000198886	4.97216e-05	9.94431e-05	9.94431e-05	0.000198886	9.94431e-05	k__Bacteria;p__Proteobacteria;c__Gammaproteobacteria
OTU_1757	5.52792e-08	0.927847	0.000745823	0.00243636	0.000546937	0.00452466	0.00477327	0.00387828	0.00094471	0.000795545	0.000795545	0.00745823	0.00601631	0.00243636	0.000696102	0.00094471	0.000596659	0.00845267	0.00860183	0.00850239	0.00064638	0.000596659	0.000845267	0.000994431	0.000994431	0.0011436	k__Bacteria;p__Proteobacteria;c__Alphaproteobacteria;o__Sphingomonadales
OTU_1	5.31842e-08	0.928202	0.0552904	0.0666269	0.0747315	0.086963	0.151303	0.153292	0.236575	0.19113	0.179296	0.0347554	0.0430091	0.0401253	0.359238	0.121818	0.145634	0.0313246	0.0620525	0.043755	0.316527	0.262778	0.280628	0.592084	0.536744	0.511436	k__Bacteria;p__Firmicutes;c__Bacilli;o__Bacillales;f__Bacillaceae;g__Bacillus
OTU_101	4.94831e-08	0.92886	0.000994431	0.00124304	0.0011436	0.000397772	0.000248608	0.000348051	0.00109387	0.00144193	0.00154137	0.000298329	0.000248608	0.000348051	0.00169053	0.00268496	0.00218775	9.94431e-05	0.000198886	0.000397772	0.000447494	0.000497216	0.00064638	0.000248608	0.000198886	0.000248608	k__Bacteria;p__Actinobacteria;c__Actinobacteria;o__Actinomycetales
OTU_204	4.23455e-08	0.930261	0.000149165	9.94431e-05	9.94431e-05	0.000149165	9.94431e-05	4.97216e-05	0.000198886	0.000149165	0.000248608	0	9.94431e-05	0.000198886	9.94431e-05	0.000149165	4.97216e-05	0.00288385	0.0018397	0.00193914	0.000198886	0.000198886	4.97216e-05	0	4.97216e-05	0.000149165	k__Bacteria;p__Bacteroidetes;c__Flavobacteriia;o__Flavobacteriales;f__Cryomorphaceae;g__;s__
OTU_901	4.10789e-08	0.930531	0.000149165	0.000447494	9.94431e-05	0.00119332	0.00144193	0.00203858	0.000248608	0.000149165	0.000298329	0.000397772	0.000298329	0.000298329	0	0.000248608	4.97216e-05	4.97216e-05	9.94431e-05	0.000198886	0	0.000149165	4.97216e-05	9.94431e-05	0	0	k__Bacteria;p__Proteobacteria;c__Betaproteobacteria
OTU_74	3.9983e-08	0.93077	0.00626492	0.00556881	0.00482299	0.00203858	0.00213803	0.00198886	0.00532021	0.0057677	0.00631464	0.00382856	0.00472355	0.00372912	0.0032319	0.00452466	0.00586714	0.00129276	0.00263524	0.00248608	0.00875099	0.00740851	0.00850239	0.000497216	0.000745823	0.000447494	k__Bacteria;p__Proteobacteria;c__Betaproteobacteria;o__Burkholderiales;f__Oxalobacteraceae
OTU_32	3.88313e-08	0.931028	0.000845267	0.00104415	0.000795545	0.00174025	0.00129276	0.00129276	0.00815434	0.0140712	0.0111874	0.00169053	0.00104415	0.00149165	0.000497216	0.00064638	0.000745823	0.000894988	0.0013922	0.00109387	0.000596659	0.000447494	0.000795545	0.000397772	0.000696102	0.00064638	k__Bacteria;p__Proteobacteria;c__Gammaproteobacteria;o__Xanthomonadales;f__Sinobacteraceae;g__Steroidobacter;s__
OTU_8	3.81617e-08	0.931181	0.00372912	0.00472355	0.00472355	0.00497216	0.00735879	0.00765712	0.0107896	0.00959626	0.00875099	0.00278441	0.00362967	0.00353023	0.0164081	0.00671241	0.00755768	0.00258552	0.00541965	0.0036794	0.0137729	0.0118835	0.0129773	0.0264519	0.0245127	0.024115	k__Bacteria;p__Firmicutes;c__Bacilli;o__Bacillales;f__Bacillaceae
OTU_213	3.62084e-08	0.93164	0.000198886	0.000198886	0.000149165	0.00218775	0.00288385	0.00357995	0.000248608	0.000447494	0.000149165	9.94431e-05	0.000149165	0.00109387	0.000198886	0.000149165	0.000298329	0.000198886	9.94431e-05	0.000198886	0.000149165	0.000298329	0.000149165	0.000149165	0.000198886	0.000198886	k__Bacteria;p__Chloroflexi;c__Ellin6529;o__;f__;g__;s__
OTU_5	3.20137e-08	0.932706	0.0177009	0.0200875	0.0118835	0.0032319	0.00308274	0.00293357	0.0171042	0.0159109	0.0190931	0.00188942	0.00169053	0.00228719	0.0216289	0.0239161	0.0184467	0.00164081	0.00188942	0.00218775	0.0319212	0.0518099	0.0499702	0.00198886	0.00198886	0.00193914	k__Bacteria;p__Actinobacteria;c__Actinobacteria;o__Actinomycetales;f__ACK-M1;g__;s__
OTU_491	3.0734e-08	0.933055	0	0	0	0.000745823	0.00119332	0.000994431	9.94431e-05	0	0	0.000248608	9.94431e-05	0	4.97216e-05	0.000198886	0	9.94431e-05	9.94431e-05	0	4.97216e-05	0	9.94431e-05	4.97216e-05	4.97216e-05	9.94431e-05	k__Bacteria;p__Proteobacteria;c__Gammaproteobacteria;o__Thiotrichales;f__Piscirickettsiaceae;g__;s__
OTU_834	2.77446e-08	0.933922	0.000149165	0.000298329	9.94431e-05	0.0013922	0.00149165	0.000994431	0.000149165	0.000149165	9.94431e-05	0.000198886	0.000447494	0.000497216	4.97216e-05	0.000149165	0.000149165	0.000397772	0.000149165	0.000149165	0.000149165	9.94431e-05	0	9.94431e-05	4.97216e-05	9.94431e-05	k__Bacteria;p__Acidobacteria;c__AT-s54;o__;f__;g__;s__
OTU_223	2.72095e-08	0.934086	9.94431e-05	9.94431e-05	4.97216e-05	0.000298329	0.000248608	9.94431e-05	4.97216e-05	0	4.97216e-05	0.000149165	4.97216e-05	0.000198886	4.97216e-05	0.000149165	9.94431e-05	0.0013922	0.00218775	0.0025358	0.000149165	0.000248608	0.000149165	0	4.97216e-05	0	k__Bacteria;p__Proteobacteria;c__Alphaproteobacteria
OTU_297	2.17192e-08	0.935952	0.000298329	9.94431e-05	9.94431e-05	0.000149165	4.97216e-05	0	4.97216e-05	9.94431e-05	9.94431e-05	4.97216e-05	4.97216e-05	0.000149165	4.97216e-05	4.97216e-05	0	0.000198886	0.000546937	0.000497216	0.00124304	0.000994431	0.00094471	9.94431e-05	4.97216e-05	0	k__Bacteria;p__Bacteroidetes;c__Sphingobacteriia;o__Sphingobacteriales;f__;g__;s__
OTU_114	1.99426e-08	0.936645	0.000397772	0.000447494	0.000298329	0.00268496	0.00203858	0.00263524	0.000546937	0.000298329	0.000894988	0.0013922	0.00198886	0.00119332	9.94431e-05	0.000348051	0.000497216	0.00109387	0.00154137	0.00193914	0.000298329	0.000447494	0.000348051	4.97216e-05	9.94431e-05	9.94431e-05	k__Bacteria;p__Proteobacteria;c__Betaproteobacteria;o__Burkholderiales;f__Alcaligenaceae;g__;s__
OTU_137	1.70746e-08	0.937885	0.000248608	0.000845267	0.000248608	0.000397772	0.000248608	0.000397772	0.000198886	0.000248608	0.000298329	0.000198886	0.000198886	9.94431e-05	0.000248608	0.000298329	0.000348051	0.000198886	0.000298329	0.000348051	0.00372912	0.00233691	0.00308274	0.000198886	0.000298329	0.000248608	k__Bacteria;p__Chloroflexi;c__Chloroflexi;o__[Roseiflexales];f__;g__;s__
OTU_278	1.69321e-08	0.937952	0.000497216	0.000248608	0.000248608	0.00208831	0.00293357	0.00293357	0.000497216	0.000397772	0.000298329	0.000745823	0.0011436	0.00188942	0.000149165	9.94431e-05	0.000298329	0.000348051	0.000298329	0.000447494	0.000198886	0.000248608	0.000248608	0.000198886	0.000198886	4.97216e-05	k__Bacteria;p__Proteobacteria;c__Betaproteobacteria;o__MND1;f__;g__;s__
OTU_11	1.68769e-08	0.937977	0.00298329	0.00273469	0.00377884	0.00447494	0.00626492	0.00561854	0.00919849	0.00835322	0.00770684	0.00198886	0.00198886	0.00233691	0.0125796	0.00566826	0.00581742	0.00174025	0.00422633	0.00313246	0.00939737	0.00954654	0.00994431	0.0200378	0.0185959	0.0184467	k__Bacteria;p__Firmicutes;c__Bacilli;o__Bacillales;f__Bacillaceae;g__Bacillus;s__
OTU_107	1.66101e-08	0.938103	0.00278441	0.0018397	0.0018397	0.000397772	0.000397772	0.000348051	0.000397772	0.00094471	0.000845267	0.000447494	0.000447494	0.000198886	0.000348051	0.000596659	0.000795545	0.000546937	0.000596659	0.00064638	0.00372912	0.00298329	0.00442522	0.000149165	9.94431e-05	0.000248608	k__Bacteria;p__Bacteroidetes;c__[Saprospirae];o__[Saprospirales];f__Chitinophagaceae
OTU_264	1.61991e-08	0.9383	0.000745823	0.000397772	0.000298329	0.00283413	0.00333134	0.00348051	0.000497216	0.000348051	0.000596659	0.00268496	0.00094471	0.0013922	0.000149165	0.000348051	0.000298329	0.00104415	0.000894988	0.000795545	0.000348051	0.000397772	0.000298329	0.000149165	0.000298329	0	k__Bacteria;p__Proteobacteria;c__Betaproteobacteria;o__SC-I-84;f__;g__;s__
OTU_1060	1.35892e-08	0.939665	4.97216e-05	0.000248608	0	0.00094471	0.000845267	0.00104415	9.94431e-05	0.000149165	0.000149165	9.94431e-05	4.97216e-05	0.000447494	0.000149165	9.94431e-05	0.000149165	0.000198886	0.000198886	0.000149165	9.94431e-05	0.000149165	0.000149165	0	0.000149165	9.94431e-05	k__Bacteria;p__Acidobacteria;c__Acidobacteria-6;o__iii1-15;f__;g__;s__
OTU_377	1.02907e-08	0.941761	0.000198886	0.000348051	0.000149165	0.00218775	0.00144193	0.00193914	0.000348051	0.000198886	0.000348051	0.00064638	0.000497216	0.000696102	9.94431e-05	0.000248608	0.000198886	0.000596659	0.000298329	0.000546937	0.000149165	0.000248608	0.000149165	0.000149165	0.000149165	9.94431e-05	k__Bacteria;p__Acidobacteria;c__Acidobacteria-6;o__CCU21;f__;g__;s__
OTU_60	1.02254e-08	0.941808	0.00064638	0.00109387	0.00064638	0.000546937	0.000845267	0.000596659	0.000696102	0.000397772	0.000348051	0.000894988	0.000894988	0.000994431	0.000298329	0.000248608	0.000546937	0.000497216	0.000447494	0.00064638	0.00676213	0.00407717	0.00556881	0.000198886	0.000397772	0.000348051	k__Bacteria;p__Proteobacteria;c__Betaproteobacteria;o__Burkholderiales
OTU_9	9.80308e-09	0.94212	0.02143	0.0198389	0.0153142	0.00457438	0.00422633	0.00492243	0.0121818	0.0116846	0.0131762	0.00775656	0.00711018	0.00840294	0.00711018	0.00929793	0.0112371	0.00313246	0.00357995	0.00527049	0.0294352	0.0208333	0.0272971	0.00134248	0.00164081	0.00159109	k__Bacteria;p__Proteobacteria;c__Betaproteobacteria;o__MWH-UniP1;f__;g__;s__
OTU_168	9.60844e-09	0.942267	0.000149165	0.000348051	0.000149165	0.000348051	0.000248608	0.000397772	0.00104415	0.0011436	0.00124304	0.000397772	0.000397772	0.000149165	0.0011436	0.00124304	0.00129276	0.000248608	0.000298329	0.000298329	0.000198886	4.97216e-05	0.000248608	0.000248608	0.000149165	0.000298329	k__Bacteria;p__Proteobacteria;c__Gammaproteobacteria
OTU_1051	9.45712e-09	0.942383	0.000497216	0.000447494	0.000248608	0.00372912	0.00303302	0.00268496	0.000348051	0.00064638	0.000696102	0.00238663	0.00174025	0.0013922	0.000198886	0.000248608	0.000248608	0.00203858	0.00174025	0.00263524	0.000497216	0.000546937	0.000198886	0.000348051	0.000198886	0.000397772	k__Bacteria;p__Proteobacteria;c__Gammaproteobacteria;o__Xanthomonadales;f__Sinobacteraceae;g__Steroidobacter;s__
OTU_284	6.8672e-09	0.94468	0.000298329	0.000298329	9.94431e-05	0.000397772	0.000546937	0.000546937	0.000248608	0.000298329	0.000198886	0.00129276	0.00104415	0.00178998	4.97216e-05	0.000149165	0.000348051	0.00188942	0.00178998	0.00218775	0.000348051	9.94431e-05	0.000298329	9.94431e-05	9.94431e-05	0	k__Bacteria;p__Proteobacteria;c__Betaproteobacteria;o__Burkholderiales;f__Alcaligenaceae;g__;s__
OTU_217	6.83736e-09	0.94471	0.000348051	0.000348051	0.000198886	0.000845267	0.000696102	0.000894988	0.000149165	0.000298329	0.000298329	0.00104415	0.00104415	0.000596659	0.000198886	0.000149165	0.000149165	0.00164081	0.00263524	0.00203858	0.000198886	0.000248608	9.94431e-05	4.97216e-05	0.000149165	0.000198886	k__Bacteria;p__Bacteroidetes;c__[Saprospirae];o__[Saprospirales];f__Chitinophagaceae;g__;s__
OTU_4172	6.81083e-09	0.944738	9.94431e-05	0.000149165	0.000149165	0.000397772	0.000546937	0.000447494	0.000198886	0.000149165	4.97216e-05	0.000497216	0.000894988	0.000795545	9.94431e-05	9.94431e-05	0.000198886	0.00119332	0.00193914	0.0013922	4.97216e-05	4.97216e-05	4.97216e-05	0.000149165	0.000149165	4.97216e-05	k__Bacteria;p__Proteobacteria;c__Alphaproteobacteria;o__Rhodospirillales;f__Acetobacteraceae;g__;s__
OTU_443	6.75661e-09	0.944794	4.97216e-05	4.97216e-05	4.97216e-05	0.000795545	0.00134248	0.00124304	9.94431e-05	0.000248608	0.000198886	9.94431e-05	0.000348051	0.000298329	4.97216e-05	9.94431e-05	9.94431e-05	0.000198886	9.94431e-05	0.000149165	9.94431e-05	0.000198886	9.94431e-05	0	4.97216e-05	0	k__Bacteria;p__Proteobacteria;c__Gammaproteobacteria
OTU_151	6.07414e-09	0.945536	0.000447494	0.000497216	0.000497216	0.00188942	0.00124304	0.00109387	0.00283413	0.00273469	0.00308274	0.00169053	0.00223747	0.00154137	0.000994431	0.00129276	0.00134248	0.000198886	0.000298329	0.000497216	0.000397772	0.000348051	0.000348051	4.97216e-05	0.000149165	0.000198886	k__Bacteria;p__Proteobacteria;c__Betaproteobacteria
OTU_4391	5.89104e-09	0.945747	0.00109387	0.00134248	0.000894988	0.000994431	0.000845267	0.000894988	0.00402745	0.00407717	0.0043755	0.00134248	0.00164081	0.0013922	0.00402745	0.00467383	0.00606603	0.000546937	0.000845267	0.000994431	0.00203858	0.00218775	0.00283413	0.000497216	0.000348051	0.000397772	k__Bacteria;p__Proteobacteria;c__Betaproteobacteria;o__Methylophilales;f__Methylophilaceae;g__;s__
OTU_5515	4.72643e-09	0.947243	0.00149165	0.000745823	0.000696102	0.00492243	0.00427605	0.00353023	0.0011436	0.000894988	0.0011436	0.00362967	0.00328162	0.00213803	0.000348051	0.000546937	0.000497216	0.00174025	0.0018397	0.00178998	0.00064638	0.000447494	0.000447494	0.000248608	0.000298329	0.000348051	k__Bacteria;p__Proteobacteria;c__Betaproteobacteria;o__Burkholderiales;f__Alcaligenaceae;g__;s__
OTU_299	3.69355e-09	0.948869	4.97216e-05	9.94431e-05	0.000149165	0.0011436	0.00104415	0.00134248	0	9.94431e-05	0	0.000198886	0.000198886	0.000596659	4.97216e-05	9.94431e-05	4.97216e-05	9.94431e-05	9.94431e-05	0.000198886	0.000149165	9.94431e-05	0.000198886	0.000149165	0.000198886	0	k__Bacteria;p__Chloroflexi;c__Anaerolineae;o__Caldilineales;f__Caldilineaceae;g__;s__
OTU_369	3.68789e-09	0.948879	9.94431e-05	0.000198886	0	0.000696102	0.000845267	0.00104415	9.94431e-05	0	0.000248608	0.000596659	0.000198886	0.000497216	9.94431e-05	0.000149165	9.94431e-05	0.000894988	0.0011436	0.000994431	4.97216e-05	4.97216e-05	9.94431e-05	4.97216e-05	9.94431e-05	9.94431e-05	k__Bacteria;p__Proteobacteria;c__Deltaproteobacteria;o__Myxococcales;f__Nannocystaceae;g__Nannocystis;s__exedens
OTU_160	3.63116e-09	0.948979	0.000248608	0.000397772	0.000149165	0.00144193	0.00203858	0.00174025	9.94431e-05	0.000149165	0.000298329	0.000546937	0.000348051	0.00109387	0.000149165	0.000149165	0.000198886	0.00308274	0.00318218	0.00432578	0.000248608	0.000298329	0.000198886	0.000447494	0.000348051	9.94431e-05	k__Bacteria;p__Proteobacteria;c__Alphaproteobacteria;o__;f__;g__;s__
OTU_145	3.45338e-09	0.949303	0.000298329	0.000149165	0.000348051	0.000596659	0.000447494	0.000198886	0.000397772	0.000149165	0.000149165	0.000596659	0.000546937	0.000546937	0.000248608	0.000149165	9.94431e-05	0.00283413	0.00318218	0.00417661	0.000497216	0.000248608	0.000248608	9.94431e-05	4.97216e-05	0.000198886	k__Bacteria;p__Proteobacteria;c__Betaproteobacteria
OTU_406	2.89945e-09	0.950415	0.000198886	9.94431e-05	9.94431e-05	0.00104415	0.00159109	0.00159109	9.94431e-05	0	9.94431e-05	9.94431e-05	9.94431e-05	9.94431e-05	4.97216e-05	9.94431e-05	9.94431e-05	4.97216e-05	0	9.94431e-05	4.97216e-05	9.94431e-05	4.97216e-05	0	9.94431e-05	0.000198886	k__Bacteria;p__Gemmatimonadetes;c__Gemm-1;o__;f__;g__;s__
OTU_340	2.7425e-09	0.950764	0	0.000149165	9.94431e-05	0.000795545	0.00109387	0.00129276	4.97216e-05	4.97216e-05	0.000149165	0	4.97216e-05	0.000149165	0.000198886	0.000149165	4.97216e-05	4.97216e-05	9.94431e-05	0.000149165	4.97216e-05	4.97216e-05	4.97216e-05	4.97216e-05	9.94431e-05	0.000149165	k__Bacteria;p__Chloroflexi;c__TK17;o__;f__;g__;s__
OTU_270	2.7226e-09	0.950809	9.94431e-05	9.94431e-05	4.97216e-05	0.00144193	0.00134248	0.00188942	4.97216e-05	0.000149165	4.97216e-05	0.000348051	0.000745823	0.000298329	9.94431e-05	4.97216e-05	0.000198886	0.000198886	0.000348051	0.000149165	0.000149165	4.97216e-05	9.94431e-05	0	4.97216e-05	4.97216e-05	k__Bacteria;p__Proteobacteria;c__Deltaproteobacteria;o__Myxococcales
OTU_558	2.57278e-09	0.951161	9.94431e-05	9.94431e-05	0	0.00104415	0.000845267	0.000696102	9.94431e-05	4.97216e-05	0	0.000149165	0.000198886	9.94431e-05	0	4.97216e-05	4.97216e-05	9.94431e-05	9.94431e-05	0.000149165	0	0	4.97216e-05	4.97216e-05	4.97216e-05	0.000198886	k__Bacteria;p__Acidobacteria;c__iii1-8;o__DS-18;f__;g__;s__
OTU_1921	2.45289e-09	0.951456	9.94431e-05	9.94431e-05	9.94431e-05	0.000845267	0.00104415	0.00129276	0.000149165	4.97216e-05	0	9.94431e-05	9.94431e-05	0.000248608	0.000149165	0	0	0	9.94431e-05	4.97216e-05	9.94431e-05	4.97216e-05	9.94431e-05	0	0	4.97216e-05	k__Bacteria;p__Proteobacteria;c__Betaproteobacteria;o__MND1;f__;g__;s__
OTU_424	2.19806e-09	0.952126	0	0	4.97216e-05	9.94431e-05	0.000149165	9.94431e-05	0.000198886	9.94431e-05	4.97216e-05	0	0.000248608	9.94431e-05	4.97216e-05	0	4.97216e-05	0.000696102	0.00109387	0.000894988	4.97216e-05	4.97216e-05	0	0	4.97216e-05	0	k__Bacteria;p__Proteobacteria;c__Alphaproteobacteria;o__Sphingomonadales;f__Sphingomonadaceae;g__Sphingopyxis
OTU_442	1.88886e-09	0.953037	9.94431e-05	4.97216e-05	4.97216e-05	0.000198886	4.97216e-05	0.000198886	0	4.97216e-05	9.94431e-05	0.000149165	0.000248608	9.94431e-05	0.000149165	0.000149165	0	0.000994431	0.000994431	0.00129276	0.000149165	9.94431e-05	9.94431e-05	0.000198886	9.94431e-05	9.94431e-05	k__Bacteria;p__Proteobacteria;c__Alphaproteobacteria;o__Sphingomonadales;f__Sphingomonadaceae;g__Sphingopyxis;s__
OTU_280	1.78393e-09	0.953376	4.97216e-05	0	4.97216e-05	9.94431e-05	9.94431e-05	4.97216e-05	9.94431e-05	4.97216e-05	0.000149165	0.000198886	0.000298329	0.000149165	4.97216e-05	0	0.000149165	0.000994431	0.00159109	0.0013922	0.000248608	0.000149165	0.000248608	0	0	9.94431e-05	k__Bacteria;p__Proteobacteria;c__Betaproteobacteria
OTU_316	1.77308e-09	0.953412	9.94431e-05	0.000198886	9.94431e-05	0.000149165	9.94431e-05	0.000298329	4.97216e-05	0.000198886	4.97216e-05	9.94431e-05	9.94431e-05	0.000198886	4.97216e-05	4.97216e-05	0.000149165	0.00129276	0.000994431	0.00134248	9.94431e-05	0	4.97216e-05	9.94431e-05	9.94431e-05	0.000149165	k__Bacteria;p__Bacteroidetes;c__[Saprospirae];o__[Saprospirales];f__Saprospiraceae;g__;s__
OTU_132	1.7579e-09	0.953463	0.000298329	0.000198886	0.000397772	0.000397772	0.000248608	0.000248608	9.94431e-05	0.000298329	0.000397772	0.000397772	0.000298329	9.94431e-05	0.000198886	0.000397772	0.000149165	0.00293357	0.00298329	0.00407717	0.000248608	0.000298329	0.000248608	4.97216e-05	0.000248608	0.000348051	k__Bacteria;p__Proteobacteria;c__Gammaproteobacteria;o__Xanthomonadales;f__Xanthomonadaceae
OTU_4	1.50657e-09	0.954363	0.0238166	0.020535	0.0215294	0.00711018	0.00631464	0.0069113	0.0225736	0.0200875	0.0255569	0.0112868	0.010541	0.0116348	0.0137232	0.0189439	0.0193417	0.00402745	0.00467383	0.00616547	0.0255072	0.0198886	0.0251094	0.0032319	0.0043755	0.00357995	k__Bacteria;p__Proteobacteria;c__Betaproteobacteria;o__Burkholderiales;f__Oxalobacteraceae;g__Polynucleobacter;s__
OTU_3961	1.31226e-09	0.955155	0.000348051	0.000397772	0.000447494	0.000348051	0.000198886	0.000298329	0.000447494	0.000198886	0.000298329	0	9.94431e-05	4.97216e-05	0	0	9.94431e-05	9.94431e-05	4.97216e-05	9.94431e-05	0.00124304	0.00119332	0.00094471	0.000149165	4.97216e-05	4.97216e-05	k__Bacteria;p__Cyanobacteria;c__Synechococcophycideae;o__Synechococcales;f__Synechococcaceae;g__Synechococcus;s__
OTU_17	1.21335e-09	0.955597	0.00223747	0.00338107	0.00362967	0.00228719	0.00233691	0.0025358	0.00338107	0.00442522	0.00447494	0.00193914	0.00134248	0.00169053	0.00417661	0.00596659	0.00621519	0.00134248	0.0013922	0.00263524	0.0263524	0.017502	0.0252088	0.00149165	0.00164081	0.0011436	k__Bacteria;p__Actinobacteria;c__Actinobacteria;o__Actinomycetales;f__Microbacteriaceae;g__Candidatus Aquiluna;s__rubra
OTU_78	1.20944e-09	0.955616	0.00109387	0.000894988	0.00129276	0.00681185	0.00860183	0.00880072	0.00119332	0.0011436	0.00144193	0.00581742	0.00218775	0.00333134	0.000546937	0.000845267	0.000696102	0.00094471	0.00154137	0.00149165	0.000795545	0.000845267	0.000745823	0.000198886	0.000397772	0.000149165	k__Bacteria;p__Proteobacteria;c__Betaproteobacteria;o__SC-I-84;f__;g__;s__
OTU_125	1.1251e-09	0.95602	0.00109387	0.000546937	0.000745823	0.00064638	0.000248608	0.000745823	0.000845267	0.000149165	0.000248608	0.000298329	0.000348051	0.000298329	0.000248608	0.000497216	0.000397772	0.000745823	0.000348051	0.000198886	0.00353023	0.00417661	0.00462411	0.000248608	0.000149165	0.000149165	k__Bacteria;p__Cyanobacteria;c__Synechococcophycideae;o__Synechococcales;f__Synechococcaceae;g__Synechococcus;s__
OTU_392	1.11015e-09	0.956094	0.000397772	0.000198886	0.000198886	0.00198886	0.00303302	0.0025358	9.94431e-05	0.000248608	0.000397772	0.000795545	0.00104415	0.00134248	0.000198886	4.97216e-05	0.000198886	0.000198886	0.000447494	0.000397772	0.000348051	0.000298329	0.000149165	0.000149165	4.97216e-05	0	k__Bacteria;p__Proteobacteria;c__Betaproteobacteria;o__Ellin6067;f__;g__;s__
OTU_42	9.47144e-10	0.956968	0.00129276	0.000894988	0.000596659	0.000894988	0.00119332	0.00094471	0.000447494	0.00064638	0.000596659	0.0025358	0.00174025	0.00149165	0.00064638	0.000397772	0.000397772	0.00686158	0.00855211	0.0103421	0.00154137	0.00144193	0.00178998	0.000894988	0.000845267	0.000497216	k__Bacteria;p__Proteobacteria;c__Alphaproteobacteria;o__Rhodobacterales;f__Hyphomonadaceae
OTU_527	8.85379e-10	0.957334	0.00094471	0.000795545	0.00149165	0.000447494	0.000397772	0.000149165	0.000546937	0.000546937	0.000497216	0.000348051	0.000298329	0.000497216	0.000248608	0.000298329	0.000397772	0.000348051	0.000198886	0.000397772	0.00278441	0.00243636	0.0032319	4.97216e-05	0.000149165	4.97216e-05	k__Bacteria;p__Proteobacteria;c__Betaproteobacteria
OTU_100	8.0954e-10	0.957815	0.000248608	0.000447494	9.94431e-05	0.000397772	0.000397772	0.000447494	0.000149165	0.000298329	4.97216e-05	0.000397772	0.000348051	0.000198886	0.000348051	4.97216e-05	0.000149165	0.0050716	0.00745823	0.00477327	0.000248608	0.000198886	0.000149165	9.94431e-05	0.000198886	9.94431e-05	k__Bacteria;p__Proteobacteria;c__Deltaproteobacteria;o__Myxococcales;f__Polyangiaceae;g__Sorangium;s__
OTU_356	6.58351e-10	0.958904	4.97216e-05	4.97216e-05	4.97216e-05	9.94431e-05	0.000298329	0.000149165	9.94431e-05	4.97216e-05	0	9.94431e-05	0.000149165	4.97216e-05	4.97216e-05	9.94431e-05	4.97216e-05	0.000894988	0.00119332	0.00134248	4.97216e-05	4.97216e-05	0	4.97216e-05	0	0	k__Bacteria;p__Gemmatimonadetes;c__Gemmatimonadetes;o__;f__;g__;s__
OTU_313	6.07183e-10	0.959322	0.00860183	0.00671241	0.00725935	0.00288385	0.0032319	0.00308274	0.0043755	0.00397772	0.00502188	0.00929793	0.00989459	0.0103918	0.00218775	0.00228719	0.00283413	0.00472355	0.00566826	0.00745823	0.00268496	0.00238663	0.00213803	0.00064638	0.000596659	0.000546937	k__Bacteria;p__Proteobacteria;c__Betaproteobacteria;o__Burkholderiales;f__Comamonadaceae
OTU_133	5.29931e-10	0.960016	9.94431e-05	9.94431e-05	0.000248608	0.000397772	0.000497216	0.000198886	0.000149165	0.000298329	0.000248608	0.00273469	0.00387828	0.003928	4.97216e-05	0.000248608	0.000149165	0.000298329	0.000447494	0.000298329	0.000149165	9.94431e-05	0.000149165	0.000149165	0.000149165	9.94431e-05	k__Bacteria;p__Proteobacteria;c__Deltaproteobacteria;o__Myxococcales;f__Polyangiaceae
OTU_585	5.09158e-10	0.960218	9.94431e-05	4.97216e-05	0.000149165	0.00104415	0.00154137	0.00124304	0.000149165	4.97216e-05	4.97216e-05	0.000497216	0.000397772	0.000546937	0.000198886	0.000149165	4.97216e-05	0.000298329	0.000298329	0.000248608	0.000149165	0.000149165	4.97216e-05	4.97216e-05	4.97216e-05	0	k__Bacteria;p__Proteobacteria;c__Betaproteobacteria
OTU_62	4.98065e-10	0.960329	0.000546937	0.000546937	0.000596659	0.00064638	0.000298329	0.000397772	0.000447494	0.000696102	0.000845267	0.000248608	0.000497216	0.000348051	0.000298329	0.000546937	0.000298329	0.000497216	0.000348051	0.000546937	0.000447494	0.000447494	0.000447494	0.00402745	0.00561854	0.00581742	k__Bacteria;p__Bacteroidetes;c__[Saprospirae];o__[Saprospirales];f__Chitinophagaceae;g__;s__
OTU_487	4.53598e-10	0.960795	0	9.94431e-05	0	0.000845267	0.00094471	0.00109387	4.97216e-05	4.97216e-05	4.97216e-05	9.94431e-05	0.000198886	0.000447494	0	4.97216e-05	9.94431e-05	9.94431e-05	0.000149165	0	0	4.97216e-05	4.97216e-05	0	4.97216e-05	0	k__Bacteria;p__WS3;c__PRR-12;o__Sediment-1;f__PRR-10;g__;s__
OTU_63	4.04149e-10	0.961363	0.000845267	0.000845267	0.000497216	0.00765712	0.00626492	0.00571798	0.00119332	0.000745823	0.0013922	0.00353023	0.00372912	0.00233691	0.000447494	0.000596659	0.000447494	0.00188942	0.00188942	0.00258552	0.00064638	0.000696102	0.000546937	0.000497216	0.000348051	0.000248608	k__Bacteria;p__Proteobacteria;c__Gammaproteobacteria;o__Xanthomonadales;f__Sinobacteraceae;g__;s__
OTU_480	3.80375e-10	0.961658	9.94431e-05	4.97216e-05	0	4.97216e-05	0	0	0	0.000248608	9.94431e-05	9.94431e-05	4.97216e-05	9.94431e-05	4.97216e-05	9.94431e-05	0.000149165	9.94431e-05	9.94431e-05	0.000198886	0.00144193	0.000994431	0.0013922	0	4.97216e-05	0	k__Bacteria;p__Bacteroidetes;c__[Saprospirae];o__[Saprospirales];f__Saprospiraceae;g__Saprospira;s__
OTU_4992	3.71089e-10	0.961777	0.0158115	0.0155131	0.0192422	0.00298329	0.00238663	0.00536993	0.0134745	0.0125796	0.0147176	0.00159109	0.00164081	0.00198886	0.0217283	0.0237669	0.0184467	0.00159109	0.00164081	0.00198886	0.0165076	0.0245127	0.0213803	0.00208831	0.00188942	0.00188942	k__Bacteria;p__Actinobacteria;c__Actinobacteria;o__Actinomycetales;f__ACK-M1;g__;s__
OTU_64	3.71021e-10	0.961778	0.000497216	0.000348051	0.00064638	0.000546937	0.000696102	0.000696102	0.000497216	0.000397772	0.000198886	0.000596659	0.000546937	0.00144193	0.000298329	0.000198886	0.000447494	0.00477327	0.00735879	0.00636436	0.000348051	0.000397772	0.000248608	0.000149165	0.000248608	0.000198886	k__Bacteria;p__Proteobacteria;c__Gammaproteobacteria
OTU_595	3.51775e-10	0.962035	9.94431e-05	0.000198886	0	0.0013922	0.00169053	0.00124304	9.94431e-05	4.97216e-05	9.94431e-05	0.000198886	0.000198886	0.000298329	0.000149165	4.97216e-05	4.97216e-05	0.000248608	0	0	9.94431e-05	0.000149165	0.000149165	4.97216e-05	0.000248608	9.94431e-05	k__Bacteria;p__Chloroflexi;c__TK17;o__;f__;g__;s__
OTU_153	2.91016e-10	0.962934	0.000198886	0.000149165	0	0.000298329	0.000397772	0.000348051	9.94431e-05	9.94431e-05	0.000198886	0.000795545	0.000348051	0.00104415	0.000149165	9.94431e-05	9.94431e-05	0.00308274	0.00273469	0.00362967	4.97216e-05	9.94431e-05	0.000348051	0.000198886	9.94431e-05	0.000298329	k__Bacteria;p__Proteobacteria;c__Alphaproteobacteria;o__Rhodobacterales;f__Hyphomonadaceae;g__;s__
OTU_924	2.87822e-10	0.962985	9.94431e-05	9.94431e-05	0.000198886	0.000795545	0.000994431	0.00119332	9.94431e-05	0.000149165	4.97216e-05	0.000149165	9.94431e-05	0.000198886	4.97216e-05	0.000149165	4.97216e-05	0	4.97216e-05	4.97216e-05	4.97216e-05	9.94431e-05	4.97216e-05	4.97216e-05	9.94431e-05	9.94431e-05	k__Bacteria;p__Proteobacteria;c__Betaproteobacteria;o__;f__;g__;s__
OTU_81	2.82228e-10	0.963077	0.000298329	0.000546937	0.000248608	0.000994431	0.00124304	0.00144193	0.000149165	0.000248608	0.000546937	0.000348051	0.000447494	0.000795545	9.94431e-05	0.000198886	9.94431e-05	0.0050716	0.00591687	0.00740851	0.000149165	0.000397772	0.000248608	0.000198886	0.000149165	0.000248608	k__Bacteria;p__Proteobacteria;c__Deltaproteobacteria;o__Myxococcales;f__Polyangiaceae;g__;s__
OTU_210	2.6015e-10	0.963455	0.000149165	0.000198886	0.000348051	0.000198886	0.000198886	0	4.97216e-05	0.000198886	0	0	4.97216e-05	9.94431e-05	0.000149165	0.000198886	0.000149165	0.000298329	9.94431e-05	9.94431e-05	0.00203858	0.0018397	0.00149165	4.97216e-05	9.94431e-05	0.000149165	k__Bacteria;p__Cyanobacteria;c__Synechococcophycideae;o__Pseudanabaenales;f__Pseudanabaenaceae;g__;s__
OTU_4418	2.60025e-10	0.963457	0.000546937	0.00119332	0.000546937	0.00124304	0.00159109	0.0011436	0.000795545	0.000596659	0.000596659	0.00656325	0.00840294	0.00914877	0.000348051	0.000497216	0.000497216	0.00109387	0.000745823	0.00169053	0.000447494	0.000497216	0.000546937	0.000248608	0.000149165	0.000348051	k__Bacteria;p__Proteobacteria;c__Betaproteobacteria;o__Burkholderiales;f__Comamonadaceae
OTU_250	2.33578e-10	0.963949	0.000348051	9.94431e-05	0.000248608	0.00164081	0.00159109	0.00193914	0.000149165	0.000298329	0.000546937	0.000795545	0.00119332	0.000845267	0.000149165	4.97216e-05	9.94431e-05	0.000198886	0.000298329	0.000596659	0.000248608	0.000198886	0.000248608	0	9.94431e-05	0	k__Bacteria;p__Proteobacteria;c__Betaproteobacteria;o__;f__;g__;s__
OTU_511	2.01385e-10	0.964618	0.000198886	0	9.94431e-05	0.00134248	0.00154137	0.00129276	9.94431e-05	9.94431e-05	0.000198886	0.000198886	0.000149165	0.00064638	4.97216e-05	0.000149165	9.94431e-05	4.97216e-05	0	4.97216e-05	9.94431e-05	4.97216e-05	0.000149165	9.94431e-05	4.97216e-05	0	k__Bacteria;p__Chloroflexi;c__Ellin6529;o__;f__;g__;s__
OTU_58	1.7195e-10	0.965317	0.00064638	0.00064638	0.000298329	0.000447494	0.000497216	0.000397772	0.000447494	0.000596659	0.000745823	0.000198886	0.000397772	0.000348051	0.000298329	0.000397772	0.000447494	0.000497216	0.000198886	0.000745823	0.000497216	0.000298329	0.000298329	0.00497216	0.00686158	0.00532021	k__Bacteria;p__Bacteroidetes;c__Cytophagia;o__Cytophagales;f__Cytophagaceae
OTU_21	1.42814e-10	0.96612	0.00169053	0.00188942	0.00203858	0.00178998	0.00178998	0.00159109	0.0127287	0.00835322	0.0107896	0.00338107	0.00283413	0.00407717	0.00954654	0.0105907	0.0104415	0.00109387	0.00129276	0.00203858	0.00263524	0.00149165	0.00198886	0.000497216	0.000596659	0.000546937	k__Bacteria;p__Proteobacteria;c__Betaproteobacteria;o__Burkholderiales;f__Oxalobacteraceae;g__Polynucleobacter;s__cosmopolitanus
OTU_423	1.22282e-10	0.966777	9.94431e-05	0	0	4.97216e-05	0	0	4.97216e-05	0	4.97216e-05	0.00134248	0.00094471	0.00119332	0	0.000149165	4.97216e-05	0	0	9.94431e-05	4.97216e-05	4.97216e-05	0	0	0	0	k__Bacteria;p__Proteobacteria;c__Betaproteobacteria;o__Burkholderiales;f__Comamonadaceae
OTU_315	1.16861e-10	0.966967	9.94431e-05	4.97216e-05	9.94431e-05	0.000248608	0.000348051	0.000298329	9.94431e-05	0.000149165	0.000149165	9.94431e-05	9.94431e-05	0.000348051	4.97216e-05	9.94431e-05	0	0.00094471	0.000994431	0.00109387	9.94431e-05	4.97216e-05	0	4.97216e-05	9.94431e-05	0	k__Bacteria;p__Proteobacteria;c__Deltaproteobacteria;o__Syntrophobacterales;f__Syntrophobacteraceae;g__;s__
OTU_229	6.67867e-11	0.969218	0.000298329	0.000298329	0.000397772	0.00223747	0.00178998	0.0025358	0.000348051	0.000298329	0.000348051	0.00119332	0.00104415	0.00119332	0.000149165	0.000248608	0.000198886	0.000397772	0.000596659	0.000596659	0.000149165	0.000546937	0.000298329	4.97216e-05	9.94431e-05	4.97216e-05	k__Bacteria;p__Proteobacteria;c__Betaproteobacteria;o__SC-I-84;f__;g__;s__
OTU_344	6.66316e-11	0.969227	0.000198886	0.000198886	0.000149165	0.000447494	0.000497216	0.000298329	0.000248608	0.000149165	9.94431e-05	0.00134248	0.000845267	0.0011436	0.000149165	0	0.000248608	0.00178998	0.00198886	0.00223747	9.94431e-05	0.000198886	0.000198886	4.97216e-05	0.000298329	0.000248608	k__Bacteria;p__Proteobacteria;c__Alphaproteobacteria;o__Sphingomonadales;f__;g__;s__
OTU_136	6.41866e-11	0.969372	0.000397772	0.000348051	9.94431e-05	0.000248608	0.000546937	0.000348051	0.000298329	0.000298329	0.000198886	0.000198886	4.97216e-05	0.000447494	4.97216e-05	0.000298329	9.94431e-05	0.00273469	0.00387828	0.00333134	0.000248608	0.000248608	0.000248608	0.000198886	0.000248608	9.94431e-05	k__Bacteria;p__[Thermi];c__Deinococci;o__Thermales;f__Thermaceae;g__Meiothermus;s__
OTU_61	4.12248e-11	0.971035	0.00064638	0.000546937	0.000795545	0.000447494	9.94431e-05	0.000397772	0.000447494	0.000298329	0.000497216	9.94431e-05	0.000298329	0.000149165	0.000198886	0.000845267	0.00064638	0.000795545	0.000348051	0.000248608	0.000298329	0.000546937	0.000198886	0.00616547	0.00462411	0.00591687	k__Bacteria;p__Cyanobacteria;c__Chloroplast
OTU_276	2.41211e-11	0.972926	0.000149165	4.97216e-05	4.97216e-05	9.94431e-05	0.000149165	0.000198886	9.94431e-05	4.97216e-05	0	0.000348051	0.000198886	0.000397772	0	4.97216e-05	9.94431e-05	0.00198886	0.00174025	0.00154137	9.94431e-05	4.97216e-05	4.97216e-05	0.000248608	0	9.94431e-05	k__Bacteria;p__Proteobacteria;c__Alphaproteobacteria;o__Rhodobacterales;f__Rhodobacteraceae
OTU_180	1.65367e-11	0.974183	0.000994431	0.00124304	0.000397772	0.000348051	0.000198886	0.000298329	0.000248608	0.000149165	0.000397772	0.000298329	0.000348051	0.000298329	9.94431e-05	0.000348051	0.000198886	0.000497216	0.000298329	0.000546937	0.00318218	0.00333134	0.0032319	0.000248608	9.94431e-05	9.94431e-05	k__Bacteria;p__Planctomycetes;c__Phycisphaerae;o__Phycisphaerales;f__;g__;s__
OTU_5461	1.57007e-11	0.974351	0.000248608	0.000198886	9.94431e-05	0.00159109	0.00159109	0.00134248	0.000149165	4.97216e-05	0.000298329	0.000795545	0.00064638	0.000696102	4.97216e-05	4.97216e-05	0.000149165	0.000198886	0.000298329	0.000298329	9.94431e-05	0.000198886	9.94431e-05	0	4.97216e-05	0.000149165	k__Bacteria;p__Proteobacteria;c__Betaproteobacteria
OTU_466	1.22006e-11	0.975153	0.000348051	0.000149165	0.000198886	0.00198886	0.00233691	0.00258552	0.000248608	9.94431e-05	4.97216e-05	0.00064638	0.000447494	0.000795545	4.97216e-05	9.94431e-05	0.000298329	0.000198886	0.000447494	0.000546937	0.000298329	0.000149165	0.000149165	4.97216e-05	9.94431e-05	0.000149165	k__Bacteria;p__Proteobacteria;c__Gammaproteobacteria
OTU_498	8.26116e-12	0.976343	0.000198886	4.97216e-05	0.000198886	0.00213803	0.00174025	0.00174025	0.000149165	4.97216e-05	0.000149165	9.94431e-05	0.000348051	0.000298329	4.97216e-05	4.97216e-05	0.000149165	9.94431e-05	9.94431e-05	0.000149165	0.000198886	0.000198886	0.000149165	0.000198886	9.94431e-05	9.94431e-05	k__Bacteria;p__Acidobacteria;c__Acidobacteria-6;o__iii1-15;f__;g__;s__
OTU_104	5.17976e-12	0.977692	0.000248608	0.000348051	0	0.000447494	0.000447494	0.000546937	0.000447494	0.000248608	0.000198886	0.000397772	0.000348051	0.000198886	0.000149165	0.000149165	0.000397772	0.00064638	0.000596659	0.000348051	0.00452466	0.00343079	0.00397772	0.000149165	0.000348051	0.000198886	k__Bacteria;p__Planctomycetes;c__Planctomycetia;o__Gemmatales;f__Gemmataceae;g__;s__
OTU_339	5.11261e-12	0.977729	0.000497216	0.000198886	0.000198886	0.00228719	0.00228719	0.00203858	0.000348051	0.000248608	0.000348051	0.000745823	0.000994431	0.000546937	9.94431e-05	0.000298329	0.000198886	0.000248608	0.000198886	0.000397772	0.000248608	0.000149165	0.000149165	4.97216e-05	4.97216e-05	9.94431e-05	k__Bacteria;p__Proteobacteria;c__Betaproteobacteria;o__Ellin6067;f__;g__;s__
OTU_130	4.92108e-12	0.977836	0.000397772	0.000894988	0.000348051	0.003928	0.00387828	0.00353023	0.000397772	0.000596659	0.000596659	0.00238663	0.00288385	0.00248608	0.000497216	0.000397772	0.000348051	0.00338107	0.00357995	0.00447494	0.000497216	0.000397772	0.000248608	9.94431e-05	0.000248608	0.000149165	k__Bacteria;p__Proteobacteria;c__Gammaproteobacteria;o__Xanthomonadales;f__Sinobacteraceae;g__;s__
OTU_257	4.11498e-12	0.978329	0.000149165	4.97216e-05	0.000198886	0.000248608	0.000248608	0.000397772	9.94431e-05	0.000198886	4.97216e-05	0.000198886	0	0.000198886	4.97216e-05	0.000198886	9.94431e-05	0.00223747	0.00298329	0.00248608	0.000149165	0.000198886	9.94431e-05	9.94431e-05	9.94431e-05	9.94431e-05	k__Bacteria;p__Proteobacteria;c__Gammaproteobacteria
OTU_616	3.35781e-12	0.978876	9.94431e-05	0.000397772	0.000149165	0.00208831	0.0025358	0.00243636	0.000348051	0.000447494	0.000198886	0.000248608	0.000198886	0.000745823	0	0.000149165	9.94431e-05	0.000198886	9.94431e-05	0.000198886	9.94431e-05	0.000248608	0.000149165	0.000248608	0.000198886	0.000149165	k__Bacteria;p__Chloroflexi;c__Ellin6529;o__;f__;g__;s__
OTU_326	2.85391e-12	0.979304	0.000149165	9.94431e-05	9.94431e-05	9.94431e-05	0.000198886	9.94431e-05	4.97216e-05	0.000149165	0	0.0011436	0.00119332	0.00119332	0	0	0.000198886	9.94431e-05	4.97216e-05	9.94431e-05	0	4.97216e-05	9.94431e-05	9.94431e-05	0	0	k__Bacteria;p__Proteobacteria;c__Gammaproteobacteria;o__Xanthomonadales;f__Sinobacteraceae;g__;s__
OTU_183	2.04659e-12	0.980151	0.000447494	0.000198886	9.94431e-05	0.00109387	0.00119332	0.00134248	0.000298329	0.000298329	0.000397772	0.00094471	0.000994431	0.00094471	0.000149165	9.94431e-05	0.000348051	0.00129276	0.00149165	0.00159109	0.000248608	0.000149165	9.94431e-05	4.97216e-05	9.94431e-05	0.000149165	k__Bacteria;p__Proteobacteria;c__Betaproteobacteria
OTU_4807	1.6023e-12	0.980752	0.0018397	0.00164081	0.00064638	0.00159109	0.00149165	0.00109387	0.00238663	0.00218775	0.0018397	0.0155628	0.0121818	0.0128282	0.000596659	0.00064638	0.0011436	0.00109387	0.00169053	0.00223747	0.00124304	0.00119332	0.00119332	0.00064638	0.000596659	0.000397772	k__Bacteria;p__Proteobacteria;c__Betaproteobacteria;o__Burkholderiales;f__Comamonadaceae
OTU_2214	1.58574e-12	0.980777	0.000795545	0.000894988	0.000795545	0.000546937	0.00064638	0.00064638	0.00357995	0.00278441	0.00348051	0.00109387	0.00104415	0.00119332	0.00298329	0.00298329	0.00318218	0.000596659	0.000696102	0.000994431	0.000596659	0.000397772	0.000348051	0.000198886	0.000149165	0.000198886	k__Bacteria;p__Proteobacteria;c__Betaproteobacteria;o__Burkholderiales;f__Comamonadaceae
OTU_95	1.09602e-12	0.981649	0.00064638	0.00064638	0.000198886	0.000497216	0.000497216	0.000546937	0.0013922	0.00188942	0.00109387	0.000497216	0.000497216	0.000596659	0.00482299	0.00457438	0.00536993	0.000497216	0.000397772	0.000497216	0.000447494	0.00064638	0.000348051	0.000248608	0.000298329	0.000248608	k__Bacteria;p__Proteobacteria;c__Alphaproteobacteria;o__Rickettsiales;f__;g__;s__
OTU_430	7.14207e-13	0.98261	0.000248608	0.000298329	9.94431e-05	0.00188942	0.00228719	0.00208831	0.000149165	4.97216e-05	0.000298329	0.000397772	0.00064638	0.000745823	4.97216e-05	0.000198886	0.000149165	0.000198886	0	0.000248608	0.000149165	0.000149165	0.000149165	9.94431e-05	4.97216e-05	4.97216e-05	k__Bacteria;p__Proteobacteria;c__Betaproteobacteria;o__MND1;f__;g__;s__
OTU_25	5.4263e-13	0.9832	0.00397772	0.00144193	0.00228719	0.00178998	0.00169053	0.00109387	0.00188942	0.000795545	0.00159109	0.000298329	0.000447494	0.000894988	0.000994431	0.0013922	0.000745823	0.00203858	0.000894988	0.00109387	0.0176014	0.0179495	0.0152148	0.00064638	0.000546937	0.000696102	k__Bacteria;p__Cyanobacteria;c__Synechococcophycideae;o__Synechococcales;f__Synechococcaceae;g__Synechococcus;s__
OTU_258	3.94303e-13	0.983861	0.000149165	0.000149165	9.94431e-05	0.000198886	0.000298329	0.000149165	0.000198886	4.97216e-05	0.000149165	0.000497216	0.000497216	0.000348051	0	0	4.97216e-05	0.0018397	0.00228719	0.00208831	0.000248608	9.94431e-05	0.000198886	0	4.97216e-05	0.000149165	k__Bacteria;p__Proteobacteria;c__Alphaproteobacteria;o__Rhodospirillales;f__Acetobacteraceae;g__;s__
OTU_216	3.07499e-13	0.984357	9.94431e-05	4.97216e-05	0	0.000149165	0.000248608	0.000298329	0	4.97216e-05	9.94431e-05	9.94431e-05	9.94431e-05	9.94431e-05	4.97216e-05	0.000149165	0	0.000198886	0.000298329	0.000298329	0.000149165	4.97216e-05	4.97216e-05	0.00149165	0.00169053	0.00169053	k__Bacteria;p__Proteobacteria;c__Alphaproteobacteria
OTU_109	1.74455e-13	0.985431	0.000248608	0.000298329	0.000497216	0.0043755	0.00402745	0.00467383	0.000546937	0.000248608	0.000546937	0.00149165	0.000845267	0.00149165	0.000248608	0.000497216	0.000397772	0.000298329	0.000696102	0.000447494	0.000298329	0.000348051	0.000447494	9.94431e-05	0.000248608	0	k__Bacteria;p__Proteobacteria;c__Betaproteobacteria;o__SC-I-84;f__;g__;s__
OTU_5290	7.15002e-14	0.986974	0.00094471	0.000745823	0.000795545	0.0011436	0.00124304	0.0011436	0.00094471	0.00104415	0.00109387	0.00845267	0.0103918	0.00875099	0.000546937	0.000845267	0.000696102	0.00467383	0.00631464	0.00556881	0.000795545	0.000596659	0.000795545	0.000248608	0.000546937	0.000248608	k__Bacteria;p__Proteobacteria;c__Betaproteobacteria
OTU_3669	1.0899e-14	0.989711	0.00094471	0.000994431	0.00064638	0.00626492	0.00561854	0.00656325	0.000845267	0.000596659	0.000795545	0.00258552	0.00263524	0.00258552	0.000348051	0.000596659	0.000348051	0.000497216	0.000696102	0.00124304	0.000546937	0.000348051	0.000546937	0.000149165	9.94431e-05	0.000348051	k__Bacteria;p__Proteobacteria;c__Betaproteobacteria;o__Ellin6067;f__;g__;s__
OTU_321	2.38443e-15	0.991495	9.94431e-05	4.97216e-05	0.000198886	0.00134248	0.00124304	0.00129276	9.94431e-05	9.94431e-05	9.94431e-05	0.000149165	0.000198886	9.94431e-05	9.94431e-05	4.97216e-05	0.000149165	9.94431e-05	9.94431e-05	9.94431e-05	4.97216e-05	9.94431e-05	0.000149165	0	4.97216e-05	0	k__Bacteria;p__Acidobacteria;c__Holophagae;o__Holophagales;f__Holophagaceae
OTU_121	8.86944e-16	0.992486	0.000348051	0.000397772	0.000447494	0.000198886	0.000149165	9.94431e-05	0.000298329	0.000348051	0.000198886	0.000298329	9.94431e-05	0.000149165	0.000248608	0.000348051	0.000397772	0.000198886	0.000198886	9.94431e-05	0.000348051	0.000298329	0.000248608	0.00343079	0.00303302	0.00313246	k__Bacteria;p__Actinobacteria;c__Actinobacteria;o__Actinomycetales;f__;g__;s__
