# Supplementary material for: Water Treatment Effect, Microbial Community Structure, and Metabolic Characteristics in a Field-Scale Aquaculture Wastewater Treatment System
Source: Front Microbiol. 2020 Jun 5;11:930. doi: 10.3389/fmicb.2020.00930 (PMC7325950; doi:10.3389/fmicb.2020.00930)
Supplement: Supplementary file 3 [file Table_3.xlsx]

## Sheet: Sheet1
Table S3 The microbiota genes that participate in P metabolism
KO_ID	WCP1	WCP2	WCP3	WASFP1	WASFP2	WASFP3	WAFBFP1	WAFBFP2	WAFBFP3	WBrFP1	WBrFP2	WBrFP3	WWSP1	WWSP2	WWSP3	BAS1	BAS2	BAS3	BAFB1	BAFB2	BAFB3	BBr1	BBr2	BBr3
K01841	8.13075e-06	8.27936e-06	6.05808e-06	6.33552e-06	8.90191e-06	7.35254e-06	6.63213e-06	6.39258e-06	7.00471e-06	3.76409e-06	5.40271e-06	4.05322e-06	8.58266e-06	9.38954e-06	7.55894e-06	1.72307e-05	1.74936e-05	1.9139e-05	1.25069e-05	9.38462e-06	1.2788e-05	8.34554e-06	9.18492e-06	1.12263e-05
K00968	3.79942e-08	4.59964e-08	0	0	2.29727e-07	0	0	0	0	4.82576e-08	0	0	8.02118e-08	0	0	0	0	6.42249e-08	0	0	0	0	0	0
K03430	3.50306e-05	4.57204e-05	3.2782e-05	8.46407e-05	7.87963e-05	7.84054e-05	0.000106935	5.16201e-05	5.98845e-05	8.88423e-05	7.08479e-05	8.08441e-05	0.000180156	0.000159086	0.00014407	4.15759e-05	5.56123e-05	5.11873e-05	3.32157e-05	3.31334e-05	3.32487e-05	3.88125e-05	4.7486e-05	5.11056e-05
K03823	0.000273254	0.00038637	0.000279062	0.000383413	0.000385884	0.000402568	0.000380747	0.000328952	0.000334561	0.000423123	0.000366382	0.000422196	0.00047357	0.000455191	0.000547303	0.000290531	0.000324387	0.000346879	0.000415264	0.000391137	0.000321029	0.000327019	0.000410382	0.000411381
K05306	2.74698e-05	3.8499e-05	2.29132e-05	6.60444e-05	6.00735e-05	5.81046e-05	9.09549e-05	3.73433e-05	4.1856e-05	7.83704e-05	6.48325e-05	7.19446e-05	0.000182081	0.00016653	0.000146949	4.23541e-05	5.48024e-05	5.34994e-05	6.57517e-05	6.25801e-05	5.10495e-05	4.08131e-05	5.04252e-05	4.5469e-05
K05780	6.86175e-05	0.000104964	0.000107677	5.81136e-05	5.81783e-05	6.0512e-05	4.00454e-05	4.20845e-05	4.38081e-05	9.07726e-05	6.41641e-05	8.15931e-05	4.70041e-05	4.68136e-05	3.73447e-05	7.17018e-05	7.74253e-05	9.48602e-05	0.00015475	0.000123005	0.00010435	5.62466e-05	9.62579e-05	9.5917e-05
K06162	8.41571e-05	0.000117981	0.000115543	7.5069e-05	7.59821e-05	7.72992e-05	5.46992e-05	5.73202e-05	5.83343e-05	0.000104767	7.6362e-05	9.64842e-05	6.6656e-05	7.4781e-05	5.7052e-05	9.45464e-05	0.000106203	0.000120743	0.000189733	0.000151351	0.000130744	8.82569e-05	0.000152194	0.000136454
K06163	7.00993e-05	0.000106436	0.000108313	5.98e-05	6.07053e-05	6.29195e-05	4.22561e-05	4.43752e-05	4.60473e-05	9.22203e-05	6.51667e-05	8.28707e-05	5.10949e-05	5.29838e-05	4.17541e-05	7.46477e-05	8.10428e-05	9.80072e-05	0.000157423	0.0001254	0.000107879	5.89332e-05	9.90134e-05	0.000100004
K06164	6.97953e-05	0.000106206	0.000108019	5.87972e-05	5.92121e-05	6.1423e-05	4.05507e-05	4.26705e-05	4.42674e-05	9.18342e-05	6.49439e-05	8.25623e-05	5.05334e-05	5.27155e-05	4.13942e-05	7.39251e-05	8.01249e-05	9.73008e-05	0.000155973	0.000124203	0.000105731	5.84188e-05	9.85542e-05	9.95338e-05
K06165	6.97953e-05	0.00010616	0.000108019	5.87517e-05	5.92121e-05	6.13579e-05	4.04875e-05	4.26172e-05	4.42674e-05	9.18342e-05	6.49439e-05	8.25623e-05	5.06136e-05	5.27155e-05	4.13042e-05	7.39251e-05	8.01249e-05	9.73008e-05	0.000155973	0.000124203	0.00010568	5.83616e-05	9.85542e-05	9.95338e-05
K06166	6.97953e-05	0.00010616	0.000108019	5.87517e-05	5.91546e-05	6.12928e-05	4.04875e-05	4.26705e-05	4.42674e-05	9.18342e-05	6.49439e-05	8.26064e-05	5.06136e-05	5.27155e-05	4.13942e-05	7.39251e-05	8.01249e-05	9.73008e-05	0.000155973	0.000124203	0.000105731	5.83616e-05	9.8646e-05	9.95338e-05
K06167	0.000186627	0.00023518	0.000182231	0.000158206	0.00019165	0.000182057	0.000123926	0.000137441	0.000144573	0.000178264	0.000163529	0.000188034	0.000181359	0.0002004	0.000240176	0.000236338	0.000244478	0.000248165	0.000269668	0.000257646	0.00024159	0.000269058	0.00032184	0.000299635
K09459	5.92709e-06	5.65756e-06	3.56645e-06	3.05381e-06	4.02022e-06	2.5376e-06	2.08438e-06	2.07759e-06	2.52629e-06	1.64076e-06	3.67607e-06	2.11472e-06	2.7272e-06	2.07911e-06	1.79975e-06	1.1728e-05	1.09065e-05	1.31661e-05	2.67357e-06	3.20801e-06	5.11518e-06	4.34425e-06	5.0517e-06	5.54271e-06
